# Supplementary material for: Emergence of oscillations in a simple epidemic model with demographic data
Source: R Soc Open Sci. 2020 Jan 29;7(1):191187. doi: 10.1098/rsos.191187 (PMC7029885; doi:10.1098/rsos.191187)
Supplement: wav_spectra2D_BritishIndia.dat [file rsos191187supp49.dat]

0.000000000000000000e+00 1.301276270401772628e+00 -1.673927068067581070e+00
1.000000000000000000e+00 1.301276270401772628e+00 -2.463993546007726021e+00
2.000000000000000000e+00 1.301276270401772628e+00 -5.443694195526106228e+00
3.000000000000000000e+00 1.301276270401772628e+00 -5.019313041388254959e+00
4.000000000000000000e+00 1.301276270401772628e+00 -4.752182623659110483e+00
5.000000000000000000e+00 1.301276270401772628e+00 -5.632336026212648505e+00
6.000000000000000000e+00 1.301276270401772628e+00 -5.143155142326253149e+00
7.000000000000000000e+00 1.301276270401772628e+00 -1.582178740369258207e+00
8.000000000000000000e+00 1.301276270401772628e+00 -2.531803283996722609e+00
9.000000000000000000e+00 1.301276270401772628e+00 3.722388598273940752e-01
1.000000000000000000e+01 1.301276270401772628e+00 -8.267835526872218566e+00
1.100000000000000000e+01 1.301276270401772628e+00 -8.987382020071638111e-01
1.200000000000000000e+01 1.301276270401772628e+00 -4.576527181297232794e+00
1.300000000000000000e+01 1.301276270401772628e+00 -8.430442425025910236e-01
1.400000000000000000e+01 1.301276270401772628e+00 5.195658652384059772e-01
1.500000000000000000e+01 1.301276270401772628e+00 2.265536494808266799e+00
1.600000000000000000e+01 1.301276270401772628e+00 1.759821661936770143e+00
1.700000000000000000e+01 1.301276270401772628e+00 -3.144003815448989769e+00
1.800000000000000000e+01 1.301276270401772628e+00 -3.145949940796447741e+00
1.900000000000000000e+01 1.301276270401772628e+00 -3.052233755274948557e+00
2.000000000000000000e+01 1.301276270401772628e+00 -3.518747501842348857e+00
2.100000000000000000e+01 1.301276270401772628e+00 -1.339999318825633345e+01
2.200000000000000000e+01 1.301276270401772628e+00 -3.641130603185696035e+00
2.300000000000000000e+01 1.301276270401772628e+00 -3.443441474174221639e+00
2.400000000000000000e+01 1.301276270401772628e+00 -6.934281445291591517e+00
2.500000000000000000e+01 1.301276270401772628e+00 -1.553189934911235692e+00
2.600000000000000000e+01 1.301276270401772628e+00 -1.813411234533157002e+00
2.700000000000000000e+01 1.301276270401772628e+00 -2.600115290206348018e+00
2.800000000000000000e+01 1.301276270401772628e+00 -1.149592303424462392e+00
2.900000000000000000e+01 1.301276270401772628e+00 -2.156878388494507970e+00
3.000000000000000000e+01 1.301276270401772628e+00 -5.381007815745178391e+00
3.100000000000000000e+01 1.301276270401772628e+00 -5.474379083361639253e+00
3.200000000000000000e+01 1.301276270401772628e+00 -5.245641530734910241e+00
3.300000000000000000e+01 1.301276270401772628e+00 -1.476588514138334141e+01
3.400000000000000000e+01 1.301276270401772628e+00 -4.115830988718026440e+00
3.500000000000000000e+01 1.301276270401772628e+00 -5.251698341830572936e+00
3.600000000000000000e+01 1.301276270401772628e+00 -7.580010521997446737e+00
3.700000000000000000e+01 1.301276270401772628e+00 -4.512672225513135515e+00
3.800000000000000000e+01 1.301276270401772628e+00 -1.476063167073343507e+00
3.900000000000000000e+01 1.301276270401772628e+00 -9.219464994422006399e-01
4.000000000000000000e+01 1.301276270401772628e+00 -6.574073774465968967e+00
4.100000000000000000e+01 1.301276270401772628e+00 -2.031851861567516959e+00
4.200000000000000000e+01 1.301276270401772628e+00 -3.541499236984062993e+00
4.300000000000000000e+01 1.301276270401772628e+00 -5.358163445801008784e+00
4.400000000000000000e+01 1.301276270401772628e+00 -4.227876636476215921e+00
4.500000000000000000e+01 1.301276270401772628e+00 -1.164784867690177705e+01
4.600000000000000000e+01 1.301276270401772628e+00 -5.294301706930585105e+00
4.700000000000000000e+01 1.301276270401772628e+00 -1.315112255440712907e+01
4.800000000000000000e+01 1.301276270401772628e+00 -4.602170354149970777e+00
4.900000000000000000e+01 1.301276270401772628e+00 -5.464107395164204739e+00
5.000000000000000000e+01 1.301276270401772628e+00 -1.023394947487772377e+00
0.000000000000000000e+00 1.384609603735105887e+00 -1.636579790831152348e+00
1.000000000000000000e+00 1.384609603735105887e+00 -2.576872448619415668e+00
2.000000000000000000e+00 1.384609603735105887e+00 -5.863307685241492706e+00
3.000000000000000000e+00 1.384609603735105887e+00 -4.227015367898384390e+00
4.000000000000000000e+00 1.384609603735105887e+00 -4.107621827973897410e+00
5.000000000000000000e+00 1.384609603735105887e+00 -4.375872287500060409e+00
6.000000000000000000e+00 1.384609603735105887e+00 -5.161478249464543033e+00
7.000000000000000000e+00 1.384609603735105887e+00 -7.470893291065886510e-01
8.000000000000000000e+00 1.384609603735105887e+00 -2.496880300480274428e+00
9.000000000000000000e+00 1.384609603735105887e+00 8.397208688862571879e-01
1.000000000000000000e+01 1.384609603735105887e+00 -5.204383617561585851e+00
1.100000000000000000e+01 1.384609603735105887e+00 -3.089861121835333832e-02
1.200000000000000000e+01 1.384609603735105887e+00 -5.145676243449997855e+00
1.300000000000000000e+01 1.384609603735105887e+00 -1.289210596516877638e+00
1.400000000000000000e+01 1.384609603735105887e+00 -5.310329132800290647e-02
1.500000000000000000e+01 1.384609603735105887e+00 2.272295496268772919e+00
1.600000000000000000e+01 1.384609603735105887e+00 1.759800917502540640e+00
1.700000000000000000e+01 1.384609603735105887e+00 -5.874698442472289450e+00
1.800000000000000000e+01 1.384609603735105887e+00 -2.119849050382702771e+00
1.900000000000000000e+01 1.384609603735105887e+00 -2.787042115416653143e+00
2.000000000000000000e+01 1.384609603735105887e+00 -3.185561763450840633e+00
2.100000000000000000e+01 1.384609603735105887e+00 -1.203485169889083650e+01
2.200000000000000000e+01 1.384609603735105887e+00 -3.328424373103418876e+00
2.300000000000000000e+01 1.384609603735105887e+00 -2.934682996160764112e+00
2.400000000000000000e+01 1.384609603735105887e+00 -8.205611356775310838e+00
2.500000000000000000e+01 1.384609603735105887e+00 -1.411831011477817865e+00
2.600000000000000000e+01 1.384609603735105887e+00 -2.054578614161727934e+00
2.700000000000000000e+01 1.384609603735105887e+00 -3.458333109870586064e+00
2.800000000000000000e+01 1.384609603735105887e+00 -1.122637891128760890e+00
2.900000000000000000e+01 1.384609603735105887e+00 -2.071183139541723062e+00
3.000000000000000000e+01 1.384609603735105887e+00 -3.915895334539863715e+00
3.100000000000000000e+01 1.384609603735105887e+00 -4.659805093784905594e+00
3.200000000000000000e+01 1.384609603735105887e+00 -4.329718026596993674e+00
3.300000000000000000e+01 1.384609603735105887e+00 -1.256113855531059365e+01
3.400000000000000000e+01 1.384609603735105887e+00 -3.862247466550050579e+00
3.500000000000000000e+01 1.384609603735105887e+00 -5.694830349895348753e+00
3.600000000000000000e+01 1.384609603735105887e+00 -1.378619467476140237e+01
3.700000000000000000e+01 1.384609603735105887e+00 -5.762774743357800489e+00
3.800000000000000000e+01 1.384609603735105887e+00 -1.515844715757959094e+00
3.900000000000000000e+01 1.384609603735105887e+00 -6.963044617848181961e-01
4.000000000000000000e+01 1.384609603735105887e+00 -7.400930416606995799e+00
4.100000000000000000e+01 1.384609603735105887e+00 -1.455623177104342636e+00
4.200000000000000000e+01 1.384609603735105887e+00 -3.229551392859491443e+00
4.300000000000000000e+01 1.384609603735105887e+00 -4.592181829129604154e+00
4.400000000000000000e+01 1.384609603735105887e+00 -3.806745152026862034e+00
4.500000000000000000e+01 1.384609603735105887e+00 -1.289639823603031310e+01
4.600000000000000000e+01 1.384609603735105887e+00 -4.654916201153648458e+00
4.700000000000000000e+01 1.384609603735105887e+00 -1.363836428356845865e+01
4.800000000000000000e+01 1.384609603735105887e+00 -3.543625331956983260e+00
4.900000000000000000e+01 1.384609603735105887e+00 -6.713562312332614468e+00
5.000000000000000000e+01 1.384609603735105887e+00 -8.221767725078445999e-01
0.000000000000000000e+00 1.467942937068439369e+00 -1.669417551301848768e+00
1.000000000000000000e+00 1.467942937068439369e+00 -2.823885907333513856e+00
2.000000000000000000e+00 1.467942937068439369e+00 -6.308873544866458793e+00
3.000000000000000000e+00 1.467942937068439369e+00 -3.654660911410963831e+00
4.000000000000000000e+00 1.467942937068439369e+00 -3.543478035739589860e+00
5.000000000000000000e+00 1.467942937068439369e+00 -3.221352899536958247e+00
6.000000000000000000e+00 1.467942937068439369e+00 -5.746925308390958165e+00
7.000000000000000000e+00 1.467942937068439369e+00 -1.378740022076718925e-02
8.000000000000000000e+00 1.467942937068439369e+00 -2.533893766040970608e+00
9.000000000000000000e+00 1.467942937068439369e+00 1.306909212823393673e+00
1.000000000000000000e+01 1.467942937068439369e+00 -3.646815710696832191e+00
1.100000000000000000e+01 1.467942937068439369e+00 6.587060751953901505e-01
1.200000000000000000e+01 1.467942937068439369e+00 -4.931808431484883570e+00
1.300000000000000000e+01 1.467942937068439369e+00 -1.877496255946502934e+00
1.400000000000000000e+01 1.467942937068439369e+00 -1.114908226110619571e+00
1.500000000000000000e+01 1.467942937068439369e+00 2.214883134454160185e+00
1.600000000000000000e+01 1.467942937068439369e+00 1.702382068675516669e+00
1.700000000000000000e+01 1.467942937068439369e+00 -6.198179805178413382e+00
1.800000000000000000e+01 1.467942937068439369e+00 -1.453406280223860536e+00
1.900000000000000000e+01 1.467942937068439369e+00 -2.860163930837708257e+00
2.000000000000000000e+01 1.467942937068439369e+00 -3.015355146098518180e+00
2.100000000000000000e+01 1.467942937068439369e+00 -1.145468541690843800e+01
2.200000000000000000e+01 1.467942937068439369e+00 -3.128071989355920124e+00
2.300000000000000000e+01 1.467942937068439369e+00 -2.544549339579400549e+00
2.400000000000000000e+01 1.467942937068439369e+00 -1.135153122361831457e+01
2.500000000000000000e+01 1.467942937068439369e+00 -1.287918640189372521e+00
2.600000000000000000e+01 1.467942937068439369e+00 -2.465169006510610661e+00
2.700000000000000000e+01 1.467942937068439369e+00 -5.349494313378136745e+00
2.800000000000000000e+01 1.467942937068439369e+00 -1.139680686254493258e+00
2.900000000000000000e+01 1.467942937068439369e+00 -1.979163009258331662e+00
3.000000000000000000e+01 1.467942937068439369e+00 -2.821228221216620646e+00
3.100000000000000000e+01 1.467942937068439369e+00 -4.018954926024113306e+00
3.200000000000000000e+01 1.467942937068439369e+00 -3.473972107677619547e+00
3.300000000000000000e+01 1.467942937068439369e+00 -9.996341640916496019e+00
3.400000000000000000e+01 1.467942937068439369e+00 -3.575131616283794056e+00
3.500000000000000000e+01 1.467942937068439369e+00 -6.313866888172451119e+00
3.600000000000000000e+01 1.467942937068439369e+00 -8.104016186268157895e+00
3.700000000000000000e+01 1.467942937068439369e+00 -8.971337825661205301e+00
3.800000000000000000e+01 1.467942937068439369e+00 -1.670484280002841881e+00
3.900000000000000000e+01 1.467942937068439369e+00 -5.044724962463238427e-01
4.000000000000000000e+01 1.467942937068439369e+00 -8.641447828766070316e+00
4.100000000000000000e+01 1.467942937068439369e+00 -9.758775191351927170e-01
4.200000000000000000e+01 1.467942937068439369e+00 -3.062849712111256117e+00
4.300000000000000000e+01 1.467942937068439369e+00 -3.885103035534002380e+00
4.400000000000000000e+01 1.467942937068439369e+00 -3.480702714352170268e+00
4.500000000000000000e+01 1.467942937068439369e+00 -1.781224391756208902e+01
4.600000000000000000e+01 1.467942937068439369e+00 -4.056137310632176529e+00
4.700000000000000000e+01 1.467942937068439369e+00 -1.202343275673428025e+01
4.800000000000000000e+01 1.467942937068439369e+00 -2.707010022953757034e+00
4.900000000000000000e+01 1.467942937068439369e+00 -1.011315617440578940e+01
5.000000000000000000e+01 1.467942937068439369e+00 -6.606687234746962956e-01
0.000000000000000000e+00 1.551276270401772628e+00 -1.768088822696545659e+00
1.000000000000000000e+00 1.551276270401772628e+00 -3.248334332504972721e+00
2.000000000000000000e+00 1.551276270401772628e+00 -6.621246224739705255e+00
3.000000000000000000e+00 1.551276270401772628e+00 -3.275101362386261261e+00
4.000000000000000000e+00 1.551276270401772628e+00 -3.007016834697050722e+00
5.000000000000000000e+00 1.551276270401772628e+00 -2.209938454520902873e+00
6.000000000000000000e+00 1.551276270401772628e+00 -7.789679225354318781e+00
7.000000000000000000e+00 1.551276270401772628e+00 6.344845750165517551e-01
8.000000000000000000e+00 1.551276270401772628e+00 -2.677332100640927859e+00
9.000000000000000000e+00 1.551276270401772628e+00 1.764540946054790727e+00
1.000000000000000000e+01 1.551276270401772628e+00 -2.583192165785130445e+00
1.100000000000000000e+01 1.551276270401772628e+00 1.210189219544603789e+00
1.200000000000000000e+01 1.551276270401772628e+00 -3.767706125900441183e+00
1.300000000000000000e+01 1.551276270401772628e+00 -2.567350743794359680e+00
1.400000000000000000e+01 1.551276270401772628e+00 -3.496325595056699598e+00
1.500000000000000000e+01 1.551276270401772628e+00 2.108737710729984727e+00
1.600000000000000000e+01 1.551276270401772628e+00 1.603821877597971124e+00
1.700000000000000000e+01 1.551276270401772628e+00 -2.687455678750092058e+00
1.800000000000000000e+01 1.551276270401772628e+00 -1.071222524070705173e+00
1.900000000000000000e+01 1.551276270401772628e+00 -3.408203068420644133e+00
2.000000000000000000e+01 1.551276270401772628e+00 -2.981522281532044794e+00
2.100000000000000000e+01 1.551276270401772628e+00 -1.117128752129792701e+01
2.200000000000000000e+01 1.551276270401772628e+00 -3.068812070541536041e+00
2.300000000000000000e+01 1.551276270401772628e+00 -2.283192527195033072e+00
2.400000000000000000e+01 1.551276270401772628e+00 -1.078940392234853185e+01
2.500000000000000000e+01 1.551276270401772628e+00 -1.159108103433167392e+00
2.600000000000000000e+01 1.551276270401772628e+00 -3.069489617842972251e+00
2.700000000000000000e+01 1.551276270401772628e+00 -1.069723871748313293e+01
2.800000000000000000e+01 1.551276270401772628e+00 -1.173220155167395751e+00
2.900000000000000000e+01 1.551276270401772628e+00 -1.843795716561339670e+00
3.000000000000000000e+01 1.551276270401772628e+00 -1.960612025832221716e+00
3.100000000000000000e+01 1.551276270401772628e+00 -3.532670601695393486e+00
3.200000000000000000e+01 1.551276270401772628e+00 -2.685819600621684344e+00
3.300000000000000000e+01 1.551276270401772628e+00 -8.927165829872139469e+00
3.400000000000000000e+01 1.551276270401772628e+00 -3.249863100801627436e+00
3.500000000000000000e+01 1.551276270401772628e+00 -7.155414983594483580e+00
3.600000000000000000e+01 1.551276270401772628e+00 -6.010024493168440785e+00
3.700000000000000000e+01 1.551276270401772628e+00 -8.282423112395328246e+00
3.800000000000000000e+01 1.551276270401772628e+00 -1.962352759983919226e+00
3.900000000000000000e+01 1.551276270401772628e+00 -3.417915724948239475e-01
4.000000000000000000e+01 1.551276270401772628e+00 -1.059133749873947572e+01
4.100000000000000000e+01 1.551276270401772628e+00 -5.892603617742780964e-01
4.200000000000000000e+01 1.551276270401772628e+00 -3.064603934732916368e+00
4.300000000000000000e+01 1.551276270401772628e+00 -3.259621177716500728e+00
4.400000000000000000e+01 1.551276270401772628e+00 -3.274039598866451239e+00
4.500000000000000000e+01 1.551276270401772628e+00 -1.350850961607545742e+01
4.600000000000000000e+01 1.551276270401772628e+00 -3.525103094725134500e+00
4.700000000000000000e+01 1.551276270401772628e+00 -9.731700963785200997e+00
4.800000000000000000e+01 1.551276270401772628e+00 -2.047965028680492239e+00
4.900000000000000000e+01 1.551276270401772628e+00 -8.752235674566861690e+00
5.000000000000000000e+01 1.551276270401772628e+00 -5.293741128587776679e-01
0.000000000000000000e+00 1.634609603735106109e+00 -1.924175035114263688e+00
1.000000000000000000e+00 1.634609603735106109e+00 -3.943735609096068462e+00
2.000000000000000000e+00 1.634609603735106109e+00 -6.583597333775001559e+00
3.000000000000000000e+00 1.634609603735106109e+00 -3.086175164518659031e+00
4.000000000000000000e+00 1.634609603735106109e+00 -2.451493719813547134e+00
5.000000000000000000e+00 1.634609603735106109e+00 -1.356188740480912314e+00
6.000000000000000000e+00 1.634609603735106109e+00 -8.770296773136546875e+00
7.000000000000000000e+00 1.634609603735106109e+00 1.208185301902544140e+00
8.000000000000000000e+00 1.634609603735106109e+00 -2.991296865961326823e+00
9.000000000000000000e+00 1.634609603735106109e+00 2.201580371117506818e+00
1.000000000000000000e+01 1.634609603735106109e+00 -1.760343680681131895e+00
1.100000000000000000e+01 1.634609603735106109e+00 1.654234850616661312e+00
1.200000000000000000e+01 1.634609603735106109e+00 -2.238649524498854682e+00
1.300000000000000000e+01 1.634609603735106109e+00 -3.256413541327106920e+00
1.400000000000000000e+01 1.634609603735106109e+00 -5.444920450887804186e+00
1.500000000000000000e+01 1.634609603735106109e+00 1.978086761906193480e+00
1.600000000000000000e+01 1.634609603735106109e+00 1.485278023467776709e+00
1.700000000000000000e+01 1.634609603735106109e+00 -1.072966078756268038e+00
1.800000000000000000e+01 1.634609603735106109e+00 -9.528219405217847049e-01
1.900000000000000000e+01 1.634609603735106109e+00 -4.888475816071990110e+00
2.000000000000000000e+01 1.634609603735106109e+00 -3.030564397865273207e+00
2.100000000000000000e+01 1.634609603735106109e+00 -1.097530137174018172e+01
2.200000000000000000e+01 1.634609603735106109e+00 -3.185403543599393039e+00
2.300000000000000000e+01 1.634609603735106109e+00 -2.160684936270697687e+00
2.400000000000000000e+01 1.634609603735106109e+00 -7.607990749226499538e+00
2.500000000000000000e+01 1.634609603735106109e+00 -1.006539082554642972e+00
2.600000000000000000e+01 1.634609603735106109e+00 -3.891787046973264719e+00
2.700000000000000000e+01 1.634609603735106109e+00 -4.191397225303374441e+00
2.800000000000000000e+01 1.634609603735106109e+00 -1.190198132549980414e+00
2.900000000000000000e+01 1.634609603735106109e+00 -1.637010859983009103e+00
3.000000000000000000e+01 1.634609603735106109e+00 -1.266393688421818764e+00
3.100000000000000000e+01 1.634609603735106109e+00 -3.188385359222061677e+00
3.200000000000000000e+01 1.634609603735106109e+00 -1.972333261888759459e+00
3.300000000000000000e+01 1.634609603735106109e+00 -8.646089494745355708e+00
3.400000000000000000e+01 1.634609603735106109e+00 -2.899243223781841738e+00
3.500000000000000000e+01 1.634609603735106109e+00 -8.390104262870094587e+00
3.600000000000000000e+01 1.634609603735106109e+00 -5.049296955621940697e+00
3.700000000000000000e+01 1.634609603735106109e+00 -5.316331820426690058e+00
3.800000000000000000e+01 1.634609603735106109e+00 -2.433459344228956045e+00
3.900000000000000000e+01 1.634609603735106109e+00 -2.053019946735945567e-01
4.000000000000000000e+01 1.634609603735106109e+00 -1.456481073477340082e+01
4.100000000000000000e+01 1.634609603735106109e+00 -2.911973673864415857e-01
4.200000000000000000e+01 1.634609603735106109e+00 -3.273500007313498994e+00
4.300000000000000000e+01 1.634609603735106109e+00 -2.734580565051977441e+00
4.400000000000000000e+01 1.634609603735106109e+00 -3.220620452165303682e+00
4.500000000000000000e+01 1.634609603735106109e+00 -1.131520255546161025e+01
4.600000000000000000e+01 1.634609603735106109e+00 -3.091405843856431357e+00
4.700000000000000000e+01 1.634609603735106109e+00 -7.743525964132440542e+00
4.800000000000000000e+01 1.634609603735106109e+00 -1.541220683330198460e+00
4.900000000000000000e+01 1.634609603735106109e+00 -5.852104150222247725e+00
5.000000000000000000e+01 1.634609603735106109e+00 -4.187786724318260934e-01
0.000000000000000000e+00 1.717942937068439369e+00 -2.122503869944770027e+00
1.000000000000000000e+00 1.717942937068439369e+00 -5.162287541791140910e+00
2.000000000000000000e+00 1.717942937068439369e+00 -6.093902993969256165e+00
3.000000000000000000e+00 1.717942937068439369e+00 -3.114219843056723391e+00
4.000000000000000000e+00 1.717942937068439369e+00 -1.848286620491895738e+00
5.000000000000000000e+00 1.717942937068439369e+00 -6.638215774325900709e-01
6.000000000000000000e+00 1.717942937068439369e+00 -4.452100560428021048e+00
7.000000000000000000e+00 1.717942937068439369e+00 1.712515335172295705e+00
8.000000000000000000e+00 1.717942937068439369e+00 -3.601551253461955593e+00
9.000000000000000000e+00 1.717942937068439369e+00 2.607818467715758981e+00
1.000000000000000000e+01 1.717942937068439369e+00 -1.069833509149846096e+00
1.100000000000000000e+01 1.717942937068439369e+00 2.017509200832085181e+00
1.200000000000000000e+01 1.717942937068439369e+00 -7.897705055701503829e-01
1.300000000000000000e+01 1.717942937068439369e+00 -3.771561322556399531e+00
1.400000000000000000e+01 1.717942937068439369e+00 -1.230356491010482278e+00
1.500000000000000000e+01 1.717942937068439369e+00 1.856491662303616508e+00
1.600000000000000000e+01 1.717942937068439369e+00 1.369628803671650630e+00
1.700000000000000000e+01 1.717942937068439369e+00 -1.875403919853014384e-02
1.800000000000000000e+01 1.717942937068439369e+00 -1.117054412803522467e+00
1.900000000000000000e+01 1.717942937068439369e+00 -1.411634957304158888e+01
2.000000000000000000e+01 1.717942937068439369e+00 -3.065661905158661327e+00
2.100000000000000000e+01 1.717942937068439369e+00 -1.091795203967195249e+01
2.200000000000000000e+01 1.717942937068439369e+00 -3.524484258584938079e+00
2.300000000000000000e+01 1.717942937068439369e+00 -2.189290847568770459e+00
2.400000000000000000e+01 1.717942937068439369e+00 -5.966618693109410287e+00
2.500000000000000000e+01 1.717942937068439369e+00 -8.214185465442622736e-01
2.600000000000000000e+01 1.717942937068439369e+00 -4.936548711673371947e+00
2.700000000000000000e+01 1.717942937068439369e+00 -2.230804685562088441e+00
2.800000000000000000e+01 1.717942937068439369e+00 -1.160627048588412036e+00
2.900000000000000000e+01 1.717942937068439369e+00 -1.353213738867566907e+00
3.000000000000000000e+01 1.717942937068439369e+00 -6.967171853275899718e-01
3.100000000000000000e+01 1.717942937068439369e+00 -2.977843684343410402e+00
3.200000000000000000e+01 1.717942937068439369e+00 -1.339460599486828052e+00
3.300000000000000000e+01 1.717942937068439369e+00 -9.320220830736523965e+00
3.400000000000000000e+01 1.717942937068439369e+00 -2.551131903817156488e+00
3.500000000000000000e+01 1.717942937068439369e+00 -1.092676821552596067e+01
3.600000000000000000e+01 1.717942937068439369e+00 -4.679027277253502426e+00
3.700000000000000000e+01 1.717942937068439369e+00 -4.004846503685764780e+00
3.800000000000000000e+01 1.717942937068439369e+00 -3.173568345192336437e+00
3.900000000000000000e+01 1.717942937068439369e+00 -9.421979821890184847e-02
4.000000000000000000e+01 1.717942937068439369e+00 -1.526880008948650769e+01
4.100000000000000000e+01 1.717942937068439369e+00 -7.547870415770426000e-02
4.200000000000000000e+01 1.717942937068439369e+00 -3.764334376931052883e+00
4.300000000000000000e+01 1.717942937068439369e+00 -2.325251803461674704e+00
4.400000000000000000e+01 1.717942937068439369e+00 -3.373462454860897353e+00
4.500000000000000000e+01 1.717942937068439369e+00 -1.063248577381985882e+01
4.600000000000000000e+01 1.717942937068439369e+00 -2.786343940368202432e+00
4.700000000000000000e+01 1.717942937068439369e+00 -6.140975516174434823e+00
4.800000000000000000e+01 1.717942937068439369e+00 -1.170536535568395875e+00
4.900000000000000000e+01 1.717942937068439369e+00 -4.443533107467626309e+00
5.000000000000000000e+01 1.717942937068439369e+00 -3.212784584276977551e-01
0.000000000000000000e+00 1.801276270401772628e+00 -2.336937656745053715e+00
1.000000000000000000e+00 1.801276270401772628e+00 -8.097503457432342344e+00
2.000000000000000000e+00 1.801276270401772628e+00 -5.287690617812210725e+00
3.000000000000000000e+00 1.801276270401772628e+00 -3.438014808967754909e+00
4.000000000000000000e+00 1.801276270401772628e+00 -1.196942437211844013e+00
5.000000000000000000e+00 1.801276270401772628e+00 -1.334982607974989910e-01
6.000000000000000000e+00 1.801276270401772628e+00 -2.418804530304152323e+00
7.000000000000000000e+00 1.801276270401772628e+00 2.148309180913635430e+00
8.000000000000000000e+00 1.801276270401772628e+00 -4.828659815411713296e+00
9.000000000000000000e+00 1.801276270401772628e+00 2.975649751701031853e+00
1.000000000000000000e+01 1.801276270401772628e+00 -4.600057390881328589e-01
1.100000000000000000e+01 1.801276270401772628e+00 2.323652597079878479e+00
1.200000000000000000e+01 1.801276270401772628e+00 4.484274880512618688e-01
1.300000000000000000e+01 1.801276270401772628e+00 -3.958607047449000937e+00
1.400000000000000000e+01 1.801276270401772628e+00 5.008096529853026668e-01
1.500000000000000000e+01 1.801276270401772628e+00 1.783775602521041614e+00
1.600000000000000000e+01 1.801276270401772628e+00 1.275567798226150851e+00
1.700000000000000000e+01 1.801276270401772628e+00 7.589276478934302572e-01
1.800000000000000000e+01 1.801276270401772628e+00 -1.643267785764892519e+00
1.900000000000000000e+01 1.801276270401772628e+00 -4.570493634810939731e+00
2.000000000000000000e+01 1.801276270401772628e+00 -2.952867236990988520e+00
2.100000000000000000e+01 1.801276270401772628e+00 -1.159366231090204558e+01
2.200000000000000000e+01 1.801276270401772628e+00 -4.161394441410610767e+00
2.300000000000000000e+01 1.801276270401772628e+00 -2.389781742799230724e+00
2.400000000000000000e+01 1.801276270401772628e+00 -4.731513876368100391e+00
2.500000000000000000e+01 1.801276270401772628e+00 -6.083774344895999109e-01
2.600000000000000000e+01 1.801276270401772628e+00 -6.106836837726214995e+00
2.700000000000000000e+01 1.801276270401772628e+00 -1.042878789251051375e+00
2.800000000000000000e+01 1.801276270401772628e+00 -1.068936900318515626e+00
2.900000000000000000e+01 1.801276270401772628e+00 -1.012997462407636107e+00
3.000000000000000000e+01 1.801276270401772628e+00 -2.221428970432397787e-01
3.100000000000000000e+01 1.801276270401772628e+00 -2.897854339944608171e+00
3.200000000000000000e+01 1.801276270401772628e+00 -7.914669746592385424e-01
3.300000000000000000e+01 1.801276270401772628e+00 -1.378549703721202313e+01
3.400000000000000000e+01 1.801276270401772628e+00 -2.240837818543623516e+00
3.500000000000000000e+01 1.801276270401772628e+00 -1.171085550920394169e+01
3.600000000000000000e+01 1.801276270401772628e+00 -4.827420551568970986e+00
3.700000000000000000e+01 1.801276270401772628e+00 -3.291528640294066221e+00
3.800000000000000000e+01 1.801276270401772628e+00 -4.418910350038454560e+00
3.900000000000000000e+01 1.801276270401772628e+00 -9.403782788902905962e-03
4.000000000000000000e+01 1.801276270401772628e+00 -1.372647436941969445e+01
4.100000000000000000e+01 1.801276270401772628e+00 6.598195799499045888e-02
4.200000000000000000e+01 1.801276270401772628e+00 -4.716184610046429526e+00
4.300000000000000000e+01 1.801276270401772628e+00 -2.043894200246406889e+00
4.400000000000000000e+01 1.801276270401772628e+00 -3.830765456197274155e+00
4.500000000000000000e+01 1.801276270401772628e+00 -1.135828810788971843e+01
4.600000000000000000e+01 1.801276270401772628e+00 -2.644208787610272893e+00
4.700000000000000000e+01 1.801276270401772628e+00 -4.852717477163847271e+00
4.800000000000000000e+01 1.801276270401772628e+00 -9.242966999834062447e-01
4.900000000000000000e+01 1.801276270401772628e+00 -3.557082182317281127e+00
5.000000000000000000e+01 1.801276270401772628e+00 -2.328007762327449215e-01
0.000000000000000000e+00 1.884609603735106109e+00 -2.525497653679086962e+00
1.000000000000000000e+00 1.884609603735106109e+00 -7.849438175783310712e+00
2.000000000000000000e+00 1.884609603735106109e+00 -4.393509052201782339e+00
3.000000000000000000e+00 1.884609603735106109e+00 -4.279744016067282608e+00
4.000000000000000000e+00 1.884609603735106109e+00 -5.232501461747672833e-01
5.000000000000000000e+00 1.884609603735106109e+00 2.330764061409937027e-01
6.000000000000000000e+00 1.884609603735106109e+00 -1.019533729392570365e+00
7.000000000000000000e+00 1.884609603735106109e+00 2.513221744960931314e+00
8.000000000000000000e+00 1.884609603735106109e+00 -8.417431187073484367e+00
9.000000000000000000e+00 1.884609603735106109e+00 3.300494131795154384e+00
1.000000000000000000e+01 1.884609603735106109e+00 8.715254599982043271e-02
1.100000000000000000e+01 1.884609603735106109e+00 2.591751462156014263e+00
1.200000000000000000e+01 1.884609603735106109e+00 1.468108623710280947e+00
1.300000000000000000e+01 1.884609603735106109e+00 -3.838453359918574392e+00
1.400000000000000000e+01 1.884609603735106109e+00 1.604283026657038258e+00
1.500000000000000000e+01 1.884609603735106109e+00 1.797143225709764591e+00
1.600000000000000000e+01 1.884609603735106109e+00 1.210578827497694521e+00
1.700000000000000000e+01 1.884609603735106109e+00 1.374344044217437499e+00
1.800000000000000000e+01 1.884609603735106109e+00 -2.784608665815011097e+00
1.900000000000000000e+01 1.884609603735106109e+00 -2.442145983075216353e+00
2.000000000000000000e+01 1.884609603735106109e+00 -2.585167065798480657e+00
2.100000000000000000e+01 1.884609603735106109e+00 -1.892701683878539143e+01
2.200000000000000000e+01 1.884609603735106109e+00 -5.257303833831777240e+00
2.300000000000000000e+01 1.884609603735106109e+00 -2.807959472069192497e+00
2.400000000000000000e+01 1.884609603735106109e+00 -3.651320366567887721e+00
2.500000000000000000e+01 1.884609603735106109e+00 -3.831369303106315627e-01
2.600000000000000000e+01 1.884609603735106109e+00 -6.983795033077662140e+00
2.700000000000000000e+01 1.884609603735106109e+00 -2.115881366998882407e-01
2.800000000000000000e+01 1.884609603735106109e+00 -9.205967589390685601e-01
2.900000000000000000e+01 1.884609603735106109e+00 -6.535509782361208497e-01
3.000000000000000000e+01 1.884609603735106109e+00 1.785035469129293839e-01
3.100000000000000000e+01 1.884609603735106109e+00 -2.954019513269679820e+00
3.200000000000000000e+01 1.884609603735106109e+00 -3.306929436055066063e-01
3.300000000000000000e+01 1.884609603735106109e+00 -8.741099707997502577e+00
3.400000000000000000e+01 1.884609603735106109e+00 -2.003152227924615669e+00
3.500000000000000000e+01 1.884609603735106109e+00 -7.552853786262392788e+00
3.600000000000000000e+01 1.884609603735106109e+00 -5.687405547178451926e+00
3.700000000000000000e+01 1.884609603735106109e+00 -2.947417512524810768e+00
3.800000000000000000e+01 1.884609603735106109e+00 -7.212999182709769919e+00
3.900000000000000000e+01 1.884609603735106109e+00 4.826067463754568632e-02
4.000000000000000000e+01 1.884609603735106109e+00 -1.494947171308791134e+01
4.100000000000000000e+01 1.884609603735106109e+00 1.432115006062109619e-01
4.200000000000000000e+01 1.884609603735106109e+00 -6.777454200299205311e+00
4.300000000000000000e+01 1.884609603735106109e+00 -1.900299061212590512e+00
4.400000000000000000e+01 1.884609603735106109e+00 -4.828133142312505122e+00
4.500000000000000000e+01 1.884609603735106109e+00 -1.732352622404296483e+01
4.600000000000000000e+01 1.884609603735106109e+00 -2.706815782663087866e+00
4.700000000000000000e+01 1.884609603735106109e+00 -3.809893322728869158e+00
4.800000000000000000e+01 1.884609603735106109e+00 -7.933011825896559843e-01
4.900000000000000000e+01 1.884609603735106109e+00 -2.952527989369207351e+00
5.000000000000000000e+01 1.884609603735106109e+00 -1.533126380146967727e-01
0.000000000000000000e+00 1.967942937068439369e+00 -2.629167808775224824e+00
1.000000000000000000e+00 1.967942937068439369e+00 -4.475299227461547957e+00
2.000000000000000000e+00 1.967942937068439369e+00 -3.576147447088446896e+00
3.000000000000000000e+00 1.967942937068439369e+00 -6.594525643806869120e+00
4.000000000000000000e+00 1.967942937068439369e+00 1.336104178842448531e-01
5.000000000000000000e+00 1.967942937068439369e+00 4.302310344861035030e-01
6.000000000000000000e+00 1.967942937068439369e+00 4.874944042206238309e-02
7.000000000000000000e+00 1.967942937068439369e+00 2.803097618561727344e+00
8.000000000000000000e+00 1.967942937068439369e+00 -6.307490016606507766e+00
9.000000000000000000e+00 1.967942937068439369e+00 3.579894985118130979e+00
1.000000000000000000e+01 1.967942937068439369e+00 5.677314272914923965e-01
1.100000000000000000e+01 1.967942937068439369e+00 2.833934001313121342e+00
1.200000000000000000e+01 1.967942937068439369e+00 2.290880818040152533e+00
1.300000000000000000e+01 1.967942937068439369e+00 -3.595259066377186397e+00
1.400000000000000000e+01 1.967942937068439369e+00 2.397716585922498922e+00
1.500000000000000000e+01 1.967942937068439369e+00 1.917970330565820003e+00
1.600000000000000000e+01 1.967942937068439369e+00 1.166119899546044225e+00
1.700000000000000000e+01 1.967942937068439369e+00 1.884936124557757386e+00
1.800000000000000000e+01 1.967942937068439369e+00 -5.880504862112138298e+00
1.900000000000000000e+01 1.967942937068439369e+00 -1.313041966018369200e+00
2.000000000000000000e+01 1.967942937068439369e+00 -1.967555888970857536e+00
2.100000000000000000e+01 1.967942937068439369e+00 -8.628465347694950438e+00
2.200000000000000000e+01 1.967942937068439369e+00 -7.353113960421041817e+00
2.300000000000000000e+01 1.967942937068439369e+00 -3.562067787285170262e+00
2.400000000000000000e+01 1.967942937068439369e+00 -2.654291104798238266e+00
2.500000000000000000e+01 1.967942937068439369e+00 -1.662101093102012761e-01
2.600000000000000000e+01 1.967942937068439369e+00 -6.854929552995188580e+00
2.700000000000000000e+01 1.967942937068439369e+00 4.052247407593853046e-01
2.800000000000000000e+01 1.967942937068439369e+00 -7.383898323581964407e-01
2.900000000000000000e+01 1.967942937068439369e+00 -3.141706360234733930e-01
3.000000000000000000e+01 1.967942937068439369e+00 5.190069076638484935e-01
3.100000000000000000e+01 1.967942937068439369e+00 -3.168279001963258068e+00
3.200000000000000000e+01 1.967942937068439369e+00 4.231613328368741961e-02
3.300000000000000000e+01 1.967942937068439369e+00 -5.803284918921253421e+00
3.400000000000000000e+01 1.967942937068439369e+00 -1.867426655663019019e+00
3.500000000000000000e+01 1.967942937068439369e+00 -5.424419665995098505e+00
3.600000000000000000e+01 1.967942937068439369e+00 -8.532087253199136967e+00
3.700000000000000000e+01 1.967942937068439369e+00 -2.897049384457221155e+00
3.800000000000000000e+01 1.967942937068439369e+00 -7.798575662669980701e+00
3.900000000000000000e+01 1.967942937068439369e+00 8.011102561040885084e-02
4.000000000000000000e+01 1.967942937068439369e+00 -1.922061618044073228e+01
4.100000000000000000e+01 1.967942937068439369e+00 1.680549387227625036e-01
4.200000000000000000e+01 1.967942937068439369e+00 -1.088396105648117818e+01
4.300000000000000000e+01 1.967942937068439369e+00 -1.902231167601618811e+00
4.400000000000000000e+01 1.967942937068439369e+00 -7.335019114517137062e+00
4.500000000000000000e+01 1.967942937068439369e+00 -8.975090805002034600e+00
4.600000000000000000e+01 1.967942937068439369e+00 -3.034905320314840615e+00
4.700000000000000000e+01 1.967942937068439369e+00 -2.960581237327450488e+00
4.800000000000000000e+01 1.967942937068439369e+00 -7.693507599578374156e-01
4.900000000000000000e+01 1.967942937068439369e+00 -2.525280818237253033e+00
5.000000000000000000e+01 1.967942937068439369e+00 -8.588842877373301099e-02
0.000000000000000000e+00 2.051276270401772628e+00 -2.583346466244506257e+00
1.000000000000000000e+00 2.051276270401772628e+00 -2.815785381553987055e+00
2.000000000000000000e+00 2.051276270401772628e+00 -2.924337182122832335e+00
3.000000000000000000e+00 2.051276270401772628e+00 -7.400359022406834519e+00
4.000000000000000000e+00 2.051276270401772628e+00 7.347251423688671013e-01
5.000000000000000000e+00 2.051276270401772628e+00 4.450480740635180954e-01
6.000000000000000000e+00 2.051276270401772628e+00 8.958760619473112863e-01
7.000000000000000000e+00 2.051276270401772628e+00 3.013101292052095204e+00
8.000000000000000000e+00 2.051276270401772628e+00 -3.402555154287430828e+00
9.000000000000000000e+00 2.051276270401772628e+00 3.811772471327965039e+00
1.000000000000000000e+01 2.051276270401772628e+00 9.658874135439626807e-01
1.100000000000000000e+01 2.051276270401772628e+00 3.053904946870197978e+00
1.200000000000000000e+01 2.051276270401772628e+00 2.941013886563327073e+00
1.300000000000000000e+01 2.051276270401772628e+00 -3.419456198426297444e+00
1.400000000000000000e+01 2.051276270401772628e+00 2.994146577619201111e+00
1.500000000000000000e+01 2.051276270401772628e+00 2.141826349443402666e+00
1.600000000000000000e+01 2.051276270401772628e+00 1.117525885500584071e+00
1.700000000000000000e+01 2.051276270401772628e+00 2.320271107143286216e+00
1.800000000000000000e+01 2.051276270401772628e+00 -4.961239996803709751e+00
1.900000000000000000e+01 2.051276270401772628e+00 -6.699502702608067795e-01
2.000000000000000000e+01 2.051276270401772628e+00 -1.208574568320349041e+00
2.100000000000000000e+01 2.051276270401772628e+00 -5.545057227748039885e+00
2.200000000000000000e+01 2.051276270401772628e+00 -1.425463815178360250e+01
2.300000000000000000e+01 2.051276270401772628e+00 -5.035263652692083092e+00
2.400000000000000000e+01 2.051276270401772628e+00 -1.732952524749171275e+00
2.500000000000000000e+01 2.051276270401772628e+00 2.333931792314184947e-02
2.600000000000000000e+01 2.051276270401772628e+00 -5.768480028214826305e+00
2.700000000000000000e+01 2.051276270401772628e+00 8.742918931279464179e-01
2.800000000000000000e+01 2.051276270401772628e+00 -5.513290591048596312e-01
2.900000000000000000e+01 2.051276270401772628e+00 -2.658645713605243752e-02
3.000000000000000000e+01 2.051276270401772628e+00 8.060142630755984250e-01
3.100000000000000000e+01 2.051276270401772628e+00 -3.593668192496030311e+00
3.200000000000000000e+01 2.051276270401772628e+00 3.282833248285551009e-01
3.300000000000000000e+01 2.051276270401772628e+00 -4.022046023269449933e+00
3.400000000000000000e+01 2.051276270401772628e+00 -1.855973663514081107e+00
3.500000000000000000e+01 2.051276270401772628e+00 -3.869621341813714199e+00
3.600000000000000000e+01 2.051276270401772628e+00 -7.653978961609880116e+00
3.700000000000000000e+01 2.051276270401772628e+00 -3.123596650896836024e+00
3.800000000000000000e+01 2.051276270401772628e+00 -4.268522837224843158e+00
3.900000000000000000e+01 2.051276270401772628e+00 9.171832043712650762e-02
4.000000000000000000e+01 2.051276270401772628e+00 -1.359035740264132208e+01
4.100000000000000000e+01 2.051276270401772628e+00 1.537596013051998334e-01
4.200000000000000000e+01 2.051276270401772628e+00 -5.386460979071512334e+00
4.300000000000000000e+01 2.051276270401772628e+00 -2.055919332858199056e+00
4.400000000000000000e+01 2.051276270401772628e+00 -8.298299624377660777e+00
4.500000000000000000e+01 2.051276270401772628e+00 -6.448977755739662143e+00
4.600000000000000000e+01 2.051276270401772628e+00 -3.739802284084767336e+00
4.700000000000000000e+01 2.051276270401772628e+00 -2.267401588150208980e+00
4.800000000000000000e+01 2.051276270401772628e+00 -8.439366231976264121e-01
4.900000000000000000e+01 2.051276270401772628e+00 -2.215898502521572944e+00
5.000000000000000000e+01 2.051276270401772628e+00 -3.477630032622658351e-02
0.000000000000000000e+00 2.134609603735106109e+00 -2.346817447905745535e+00
1.000000000000000000e+00 2.134609603735106109e+00 -1.694989744047416869e+00
2.000000000000000000e+00 2.134609603735106109e+00 -2.489674925280873197e+00
3.000000000000000000e+00 2.134609603735106109e+00 -3.387640842403481400e+00
4.000000000000000000e+00 2.134609603735106109e+00 1.248818454428155977e+00
5.000000000000000000e+00 2.134609603735106109e+00 2.519784379809940633e-01
6.000000000000000000e+00 2.134609603735106109e+00 1.571286440912720517e+00
7.000000000000000000e+00 2.134609603735106109e+00 3.138201056567062608e+00
8.000000000000000000e+00 2.134609603735106109e+00 -1.860911824780202783e+00
9.000000000000000000e+00 2.134609603735106109e+00 3.992560881376741477e+00
1.000000000000000000e+01 2.134609603735106109e+00 1.261703143574221420e+00
1.100000000000000000e+01 2.134609603735106109e+00 3.247616396979723596e+00
1.200000000000000000e+01 2.134609603735106109e+00 3.439003469741778840e+00
1.300000000000000000e+01 2.134609603735106109e+00 -3.434357756690515018e+00
1.400000000000000000e+01 2.134609603735106109e+00 3.444507291113090730e+00
1.500000000000000000e+01 2.134609603735106109e+00 2.439726114766719522e+00
1.600000000000000000e+01 2.134609603735106109e+00 1.027799226664155574e+00
1.700000000000000000e+01 2.134609603735106109e+00 2.692892174322718546e+00
1.800000000000000000e+01 2.134609603735106109e+00 -1.775043545973363779e+00
1.900000000000000000e+01 2.134609603735106109e+00 -3.665348682089686894e-01
2.000000000000000000e+01 2.134609603735106109e+00 -4.317630423613628698e-01
2.100000000000000000e+01 2.134609603735106109e+00 -3.418376505585400071e+00
2.200000000000000000e+01 2.134609603735106109e+00 -6.918237184255762173e+00
2.300000000000000000e+01 2.134609603735106109e+00 -1.045242420705086062e+01
2.400000000000000000e+01 2.134609603735106109e+00 -8.991496443789085413e-01
2.500000000000000000e+01 2.134609603735106109e+00 1.716044739296631316e-01
2.600000000000000000e+01 2.134609603735106109e+00 -4.444588224698232892e+00
2.700000000000000000e+01 2.134609603735106109e+00 1.231962469446261199e+00
2.800000000000000000e+01 2.134609603735106109e+00 -3.840723284014982974e-01
2.900000000000000000e+01 2.134609603735106109e+00 1.874746897759521913e-01
3.000000000000000000e+01 2.134609603735106109e+00 1.039924520696535515e+00
3.100000000000000000e+01 2.134609603735106109e+00 -4.351497073041694641e+00
3.200000000000000000e+01 2.134609603735106109e+00 5.282862970094078792e-01
3.300000000000000000e+01 2.134609603735106109e+00 -2.739817158752514192e+00
3.400000000000000000e+01 2.134609603735106109e+00 -1.984385057747836356e+00
3.500000000000000000e+01 2.134609603735106109e+00 -2.647401833024570994e+00
3.600000000000000000e+01 2.134609603735106109e+00 -4.366065381916900634e+00
3.700000000000000000e+01 2.134609603735106109e+00 -3.650186892913459324e+00
3.800000000000000000e+01 2.134609603735106109e+00 -2.676779829321608073e+00
3.900000000000000000e+01 2.134609603735106109e+00 9.357929141793538963e-02
4.000000000000000000e+01 2.134609603735106109e+00 -1.221543303011484483e+01
4.100000000000000000e+01 2.134609603735106109e+00 1.139336070796096168e-01
4.200000000000000000e+01 2.134609603735106109e+00 -3.546049452794559187e+00
4.300000000000000000e+01 2.134609603735106109e+00 -2.367162794482442045e+00
4.400000000000000000e+01 2.134609603735106109e+00 -4.542580767822498977e+00
4.500000000000000000e+01 2.134609603735106109e+00 -4.864319182971502897e+00
4.600000000000000000e+01 2.134609603735106109e+00 -5.102188355323271196e+00
4.700000000000000000e+01 2.134609603735106109e+00 -1.705222987207100083e+00
4.800000000000000000e+01 2.134609603735106109e+00 -1.006834410802168289e+00
4.900000000000000000e+01 2.134609603735106109e+00 -1.986325707576183097e+00
5.000000000000000000e+01 2.134609603735106109e+00 -3.398101836264995779e-03
0.000000000000000000e+00 2.217942937068439146e+00 -1.930794894414125995e+00
1.000000000000000000e+00 2.217942937068439146e+00 -8.725920697848374985e-01
2.000000000000000000e+00 2.217942937068439146e+00 -2.319421503120580930e+00
3.000000000000000000e+00 2.217942937068439146e+00 -1.538601416392695542e+00
4.000000000000000000e+00 2.217942937068439146e+00 1.653511179616183879e+00
5.000000000000000000e+00 2.217942937068439146e+00 -1.986603539628846449e-01
6.000000000000000000e+00 2.217942937068439146e+00 2.098708262625756049e+00
7.000000000000000000e+00 2.217942937068439146e+00 3.172870138678095753e+00
8.000000000000000000e+00 2.217942937068439146e+00 -8.117795764177173634e-01
9.000000000000000000e+00 2.217942937068439146e+00 4.115906473770820639e+00
1.000000000000000000e+01 2.217942937068439146e+00 1.435370199102282696e+00
1.100000000000000000e+01 2.217942937068439146e+00 3.405854321615772395e+00
1.200000000000000000e+01 2.217942937068439146e+00 3.800412319946017359e+00
1.300000000000000000e+01 2.217942937068439146e+00 -3.713258631480879757e+00
1.400000000000000000e+01 2.217942937068439146e+00 3.774280542926294668e+00
1.500000000000000000e+01 2.217942937068439146e+00 2.769588292687871434e+00
1.600000000000000000e+01 2.217942937068439146e+00 8.517975016047103498e-01
1.700000000000000000e+01 2.217942937068439146e+00 3.004386939741233942e+00
1.800000000000000000e+01 2.217942937068439146e+00 -1.601678450232933704e-01
1.900000000000000000e+01 2.217942937068439146e+00 -3.598697339802342521e-01
2.000000000000000000e+01 2.217942937068439146e+00 2.789466279466999987e-01
2.100000000000000000e+01 2.217942937068439146e+00 -1.791347306296371400e+00
2.200000000000000000e+01 2.217942937068439146e+00 -5.036667171161701262e+00
2.300000000000000000e+01 2.217942937068439146e+00 -5.416607739118123988e+00
2.400000000000000000e+01 2.217942937068439146e+00 -1.647710141884637658e-01
2.500000000000000000e+01 2.217942937068439146e+00 2.712312721871273924e-01
2.600000000000000000e+01 2.217942937068439146e+00 -3.268770515204887595e+00
2.700000000000000000e+01 2.217942937068439146e+00 1.499310782978700463e+00
2.800000000000000000e+01 2.217942937068439146e+00 -2.514182613315425474e-01
2.900000000000000000e+01 2.217942937068439146e+00 3.140913205168411326e-01
3.000000000000000000e+01 2.217942937068439146e+00 1.216512120011531195e+00
3.100000000000000000e+01 2.217942937068439146e+00 -5.776667506101595961e+00
3.200000000000000000e+01 2.217942937068439146e+00 6.424934782215309115e-01
3.300000000000000000e+01 2.217942937068439146e+00 -1.775193263573658475e+00
3.400000000000000000e+01 2.217942937068439146e+00 -2.262048366511092645e+00
3.500000000000000000e+01 2.217942937068439146e+00 -1.680337771118495471e+00
3.600000000000000000e+01 2.217942937068439146e+00 -2.745875715021353525e+00
3.700000000000000000e+01 2.217942937068439146e+00 -4.552698329954104395e+00
3.800000000000000000e+01 2.217942937068439146e+00 -1.654296620666240836e+00
3.900000000000000000e+01 2.217942937068439146e+00 9.948411015867583695e-02
4.000000000000000000e+01 2.217942937068439146e+00 -1.211181962759442321e+01
4.100000000000000000e+01 2.217942937068439146e+00 6.035372388883158273e-02
4.200000000000000000e+01 2.217942937068439146e+00 -2.439967221945790854e+00
4.300000000000000000e+01 2.217942937068439146e+00 -2.844615368225790419e+00
4.400000000000000000e+01 2.217942937068439146e+00 -2.956997380598151093e+00
4.500000000000000000e+01 2.217942937068439146e+00 -3.771639242242480705e+00
4.600000000000000000e+01 2.217942937068439146e+00 -8.504057742696730315e+00
4.700000000000000000e+01 2.217942937068439146e+00 -1.259822442828301581e+00
4.800000000000000000e+01 2.217942937068439146e+00 -1.245048998693926157e+00
4.900000000000000000e+01 2.217942937068439146e+00 -1.812795579869266316e+00
5.000000000000000000e+01 2.217942937068439146e+00 6.830880550851772294e-03
0.000000000000000000e+00 2.301276270401772628e+00 -1.397723214820718596e+00
1.000000000000000000e+00 2.301276270401772628e+00 -2.685022033399569463e-01
2.000000000000000000e+00 2.301276270401772628e+00 -2.485931242124498564e+00
3.000000000000000000e+00 2.301276270401772628e+00 -3.311181663744132697e-01
4.000000000000000000e+00 2.301276270401772628e+00 1.933620012172380331e+00
5.000000000000000000e+00 2.301276270401772628e+00 -1.011674780250869432e+00
6.000000000000000000e+00 2.301276270401772628e+00 2.488747540093714683e+00
7.000000000000000000e+00 2.301276270401772628e+00 3.110209399413732090e+00
8.000000000000000000e+00 2.301276270401772628e+00 -4.335505993985035167e-02
9.000000000000000000e+00 2.301276270401772628e+00 4.172213685960461937e+00
1.000000000000000000e+01 2.301276270401772628e+00 1.467578313823690195e+00
1.100000000000000000e+01 2.301276270401772628e+00 3.517408374082426459e+00
1.200000000000000000e+01 2.301276270401772628e+00 4.035958979843315753e+00
1.300000000000000000e+01 2.301276270401772628e+00 -4.307813490146835456e+00
1.400000000000000000e+01 2.301276270401772628e+00 3.997081266476266492e+00
1.500000000000000000e+01 2.301276270401772628e+00 3.089101627071918266e+00
1.600000000000000000e+01 2.301276270401772628e+00 5.372092245667692278e-01
1.700000000000000000e+01 2.301276270401772628e+00 3.249847071979269586e+00
1.800000000000000000e+01 2.301276270401772628e+00 9.362196799014581572e-01
1.900000000000000000e+01 2.301276270401772628e+00 -6.697773627392666906e-01
2.000000000000000000e+01 2.301276270401772628e+00 8.794078899201990263e-01
2.100000000000000000e+01 2.301276270401772628e+00 -5.119712728303584814e-01
2.200000000000000000e+01 2.301276270401772628e+00 -3.848315084237837524e+00
2.300000000000000000e+01 2.301276270401772628e+00 -2.957507774323241634e+00
2.400000000000000000e+01 2.301276270401772628e+00 4.630416946564125391e-01
2.500000000000000000e+01 2.301276270401772628e+00 3.218430824537155122e-01
2.600000000000000000e+01 2.301276270401772628e+00 -2.328422130096901022e+00
2.700000000000000000e+01 2.301276270401772628e+00 1.688472944377345186e+00
2.800000000000000000e+01 2.301276270401772628e+00 -1.575621463495580077e-01
2.900000000000000000e+01 2.301276270401772628e+00 3.431506020410593494e-01
3.000000000000000000e+01 2.301276270401772628e+00 1.328568825447357549e+00
3.100000000000000000e+01 2.301276270401772628e+00 -9.841614486759441505e+00
3.200000000000000000e+01 2.301276270401772628e+00 6.685869450187856833e-01
3.300000000000000000e+01 2.301276270401772628e+00 -1.057218682162832879e+00
3.400000000000000000e+01 2.301276270401772628e+00 -2.690747552828143707e+00
3.500000000000000000e+01 2.301276270401772628e+00 -9.328347541224198958e-01
3.600000000000000000e+01 2.301276270401772628e+00 -1.702699260604217280e+00
3.700000000000000000e+01 2.301276270401772628e+00 -6.035744348799413572e+00
3.800000000000000000e+01 2.301276270401772628e+00 -9.309996342239379441e-01
3.900000000000000000e+01 2.301276270401772628e+00 1.222188958128321568e-01
4.000000000000000000e+01 2.301276270401772628e+00 -1.389223823201076335e+01
4.100000000000000000e+01 2.301276270401772628e+00 -6.341826356109392685e-04
4.200000000000000000e+01 2.301276270401772628e+00 -1.692097092044213547e+00
4.300000000000000000e+01 2.301276270401772628e+00 -3.509432601834511889e+00
4.400000000000000000e+01 2.301276270401772628e+00 -2.034439751197825164e+00
4.500000000000000000e+01 2.301276270401772628e+00 -3.021977501721271775e+00
4.600000000000000000e+01 2.301276270401772628e+00 -7.854871825830707976e+00
4.700000000000000000e+01 2.301276270401772628e+00 -9.264766550237329978e-01
4.800000000000000000e+01 2.301276270401772628e+00 -1.543392640094098711e+00
4.900000000000000000e+01 2.301276270401772628e+00 -1.683390556269484861e+00
5.000000000000000000e+01 2.301276270401772628e+00 -3.599227170346230159e-03
0.000000000000000000e+00 2.384609603735106109e+00 -8.305630289180930825e-01
1.000000000000000000e+00 2.384609603735106109e+00 1.457219895264589282e-01
2.000000000000000000e+00 2.384609603735106109e+00 -3.145049370545601963e+00
3.000000000000000000e+00 2.384609603735106109e+00 5.162277785873847780e-01
4.000000000000000000e+00 2.384609603735106109e+00 2.078964515857237849e+00
5.000000000000000000e+00 2.384609603735106109e+00 -2.461919894616123372e+00
6.000000000000000000e+00 2.384609603735106109e+00 2.744203820032153018e+00
7.000000000000000000e+00 2.384609603735106109e+00 2.940909276900004254e+00
8.000000000000000000e+00 2.384609603735106109e+00 5.214449660718294410e-01
9.000000000000000000e+00 2.384609603735106109e+00 4.148795108877637361e+00
1.000000000000000000e+01 2.384609603735106109e+00 1.336692182971158216e+00
1.100000000000000000e+01 2.384609603735106109e+00 3.571504383921427550e+00
1.200000000000000000e+01 2.384609603735106109e+00 4.151837605263666298e+00
1.300000000000000000e+01 2.384609603735106109e+00 -5.247492801110273497e+00
1.400000000000000000e+01 2.384609603735106109e+00 4.120966720551127338e+00
1.500000000000000000e+01 2.384609603735106109e+00 3.363351273892766446e+00
1.600000000000000000e+01 2.384609603735106109e+00 1.901276934154549902e-02
1.700000000000000000e+01 2.384609603735106109e+00 3.421263858328298824e+00
1.800000000000000000e+01 2.384609603735106109e+00 1.746438959235782296e+00
1.900000000000000000e+01 2.384609603735106109e+00 -1.403905828950715362e+00
2.000000000000000000e+01 2.384609603735106109e+00 1.348277305914377777e+00
2.100000000000000000e+01 2.384609603735106109e+00 4.918123905582189037e-01
2.200000000000000000e+01 2.384609603735106109e+00 -2.911759364072806555e+00
2.300000000000000000e+01 2.384609603735106109e+00 -1.594784935817469496e+00
2.400000000000000000e+01 2.384609603735106109e+00 9.801832160383441295e-01
2.500000000000000000e+01 2.384609603735106109e+00 3.300933721902204465e-01
2.600000000000000000e+01 2.384609603735106109e+00 -1.623974307390513294e+00
2.700000000000000000e+01 2.384609603735106109e+00 1.805639215552679033e+00
2.800000000000000000e+01 2.384609603735106109e+00 -9.814219992048089924e-02
2.900000000000000000e+01 2.384609603735106109e+00 2.638226121521998757e-01
3.000000000000000000e+01 2.384609603735106109e+00 1.366734463865607818e+00
3.100000000000000000e+01 2.384609603735106109e+00 -7.393495036755589389e+00
3.200000000000000000e+01 2.384609603735106109e+00 5.998506404786349000e-01
3.300000000000000000e+01 2.384609603735106109e+00 -5.568669181838811211e-01
3.400000000000000000e+01 2.384609603735106109e+00 -3.257379288012760554e+00
3.500000000000000000e+01 2.384609603735106109e+00 -3.832023802089213893e-01
3.600000000000000000e+01 2.384609603735106109e+00 -9.922208552603094533e-01
3.700000000000000000e+01 2.384609603735106109e+00 -8.923832768828519946e+00
3.800000000000000000e+01 2.384609603735106109e+00 -4.092167297237755963e-01
3.900000000000000000e+01 2.384609603735106109e+00 1.678493678927121813e-01
4.000000000000000000e+01 2.384609603735106109e+00 -1.369507591831272109e+01
4.100000000000000000e+01 2.384609603735106109e+00 -7.236580058980066066e-02
4.200000000000000000e+01 2.384609603735106109e+00 -1.177138914979275031e+00
4.300000000000000000e+01 2.384609603735106109e+00 -4.423701827873736114e+00
4.400000000000000000e+01 2.384609603735106109e+00 -1.497482478195888644e+00
4.500000000000000000e+01 2.384609603735106109e+00 -2.550531073124317594e+00
4.600000000000000000e+01 2.384609603735106109e+00 -5.122293436129664812e+00
4.700000000000000000e+01 2.384609603735106109e+00 -7.079984371884915362e-01
4.800000000000000000e+01 2.384609603735106109e+00 -1.888567310739447835e+00
4.900000000000000000e+01 2.384609603735106109e+00 -1.595548660171398625e+00
5.000000000000000000e+01 2.384609603735106109e+00 -3.356493172856060692e-02
0.000000000000000000e+00 2.467942937068439146e+00 -3.032557311494671892e-01
1.000000000000000000e+00 2.467942937068439146e+00 3.774014671695102852e-01
2.000000000000000000e+00 2.467942937068439146e+00 -4.790593219855583840e+00
3.000000000000000000e+00 2.467942937068439146e+00 1.102987864805058615e+00
4.000000000000000000e+00 2.467942937068439146e+00 2.082866503573368888e+00
5.000000000000000000e+00 2.467942937068439146e+00 -5.867955597600436057e+00
6.000000000000000000e+00 2.467942937068439146e+00 2.862343913356139247e+00
7.000000000000000000e+00 2.467942937068439146e+00 2.652444924767422219e+00
8.000000000000000000e+00 2.467942937068439146e+00 9.108538712460308995e-01
9.000000000000000000e+00 2.467942937068439146e+00 4.030009966576884928e+00
1.000000000000000000e+01 2.467942937068439146e+00 1.012386877240270655e+00
1.100000000000000000e+01 2.467942937068439146e+00 3.558963939675765520e+00
1.200000000000000000e+01 2.467942937068439146e+00 4.149989531871672632e+00
1.300000000000000000e+01 2.467942937068439146e+00 -6.437218055495721458e+00
1.400000000000000000e+01 2.467942937068439146e+00 4.151835863065628018e+00
1.500000000000000000e+01 2.467942937068439146e+00 3.566781318236805554e+00
1.600000000000000000e+01 2.467942937068439146e+00 -8.000737144554787017e-01
1.700000000000000000e+01 2.467942937068439146e+00 3.509911642500953555e+00
1.800000000000000000e+01 2.467942937068439146e+00 2.352905930216610209e+00
1.900000000000000000e+01 2.467942937068439146e+00 -2.931234275455806504e+00
2.000000000000000000e+01 2.467942937068439146e+00 1.673222641284745738e+00
2.100000000000000000e+01 2.467942937068439146e+00 1.259798635610679618e+00
2.200000000000000000e+01 2.467942937068439146e+00 -2.106308825024254094e+00
2.300000000000000000e+01 2.467942937068439146e+00 -7.263321415938363002e-01
2.400000000000000000e+01 2.467942937068439146e+00 1.382442657111413897e+00
2.500000000000000000e+01 2.467942937068439146e+00 3.084388132729850573e-01
2.600000000000000000e+01 2.467942937068439146e+00 -1.143439108310823960e+00
2.700000000000000000e+01 2.467942937068439146e+00 1.852452745807795287e+00
2.800000000000000000e+01 2.467942937068439146e+00 -6.372621106765428978e-02
2.900000000000000000e+01 2.467942937068439146e+00 5.933277851704127359e-02
3.000000000000000000e+01 2.467942937068439146e+00 1.319124298310271781e+00
3.100000000000000000e+01 2.467942937068439146e+00 -4.873530823226463582e+00
3.200000000000000000e+01 2.467942937068439146e+00 4.227157610886257411e-01
3.300000000000000000e+01 2.467942937068439146e+00 -2.668127578457945570e-01
3.400000000000000000e+01 2.467942937068439146e+00 -3.912777204942801568e+00
3.500000000000000000e+01 2.467942937068439146e+00 -1.531229864962378208e-02
3.600000000000000000e+01 2.467942937068439146e+00 -5.229352345654710854e-01
3.700000000000000000e+01 2.467942937068439146e+00 -1.144384028334783210e+01
3.800000000000000000e+01 2.467942937068439146e+00 -4.496366480643815278e-02
3.900000000000000000e+01 2.467942937068439146e+00 2.316346268252255647e-01
4.000000000000000000e+01 2.467942937068439146e+00 -9.453668603128917880e+00
4.100000000000000000e+01 2.467942937068439146e+00 -1.709110948711299593e-01
4.200000000000000000e+01 2.467942937068439146e+00 -8.400723250788445506e-01
4.300000000000000000e+01 2.467942937068439146e+00 -5.788805881544965892e+00
4.400000000000000000e+01 2.467942937068439146e+00 -1.256718967541507581e+00
4.500000000000000000e+01 2.467942937068439146e+00 -2.330928000510975373e+00
4.600000000000000000e+01 2.467942937068439146e+00 -4.022859110433840257e+00
4.700000000000000000e+01 2.467942937068439146e+00 -6.125568933819516282e-01
4.800000000000000000e+01 2.467942937068439146e+00 -2.278046146017017382e+00
4.900000000000000000e+01 2.467942937068439146e+00 -1.551569157201422522e+00
5.000000000000000000e+01 2.467942937068439146e+00 -8.301417852516942975e-02
0.000000000000000000e+00 2.551276270401772628e+00 1.309556214394941021e-01
1.000000000000000000e+00 2.551276270401772628e+00 4.245469933459440903e-01
2.000000000000000000e+00 2.551276270401772628e+00 -2.185499453621980592e+01
3.000000000000000000e+00 2.551276270401772628e+00 1.473872497880581944e+00
4.000000000000000000e+00 2.551276270401772628e+00 1.941922466363083855e+00
5.000000000000000000e+00 2.551276270401772628e+00 -5.600562087697322333e+00
6.000000000000000000e+00 2.551276270401772628e+00 2.835700938278017169e+00
7.000000000000000000e+00 2.551276270401772628e+00 2.228695209010859823e+00
8.000000000000000000e+00 2.551276270401772628e+00 1.129814029125473462e+00
9.000000000000000000e+00 2.551276270401772628e+00 3.796669050910412846e+00
1.000000000000000000e+01 2.551276270401772628e+00 4.421801248609001367e-01
1.100000000000000000e+01 2.551276270401772628e+00 3.472292343526660829e+00
1.200000000000000000e+01 2.551276270401772628e+00 4.028165228283533850e+00
1.300000000000000000e+01 2.551276270401772628e+00 -7.264192207599213802e+00
1.400000000000000000e+01 2.551276270401772628e+00 4.095450352798547300e+00
1.500000000000000000e+01 2.551276270401772628e+00 3.682097505602801135e+00
1.600000000000000000e+01 2.551276270401772628e+00 -2.115875096935844635e+00
1.700000000000000000e+01 2.551276270401772628e+00 3.507854754676717590e+00
1.800000000000000000e+01 2.551276270401772628e+00 2.789148814759494499e+00
1.900000000000000000e+01 2.551276270401772628e+00 -8.216684661696719516e+00
2.000000000000000000e+01 2.551276270401772628e+00 1.842962506546190538e+00
2.100000000000000000e+01 2.551276270401772628e+00 1.814732466480708073e+00
2.200000000000000000e+01 2.551276270401772628e+00 -1.407529649590817167e+00
2.300000000000000000e+01 2.551276270401772628e+00 -1.986257410942454948e-01
2.400000000000000000e+01 2.551276270401772628e+00 1.663157828597912280e+00
2.500000000000000000e+01 2.551276270401772628e+00 2.708555059710380797e-01
2.600000000000000000e+01 2.551276270401772628e+00 -8.808925576669477397e-01
2.700000000000000000e+01 2.551276270401772628e+00 1.826553915666641714e+00
2.800000000000000000e+01 2.551276270401772628e+00 -4.406947608899494662e-02
2.900000000000000000e+01 2.551276270401772628e+00 -3.004982429405058109e-01
3.000000000000000000e+01 2.551276270401772628e+00 1.169830703070815714e+00
3.100000000000000000e+01 2.551276270401772628e+00 -3.691468854407756961e+00
3.200000000000000000e+01 2.551276270401772628e+00 1.130342660032482294e-01
3.300000000000000000e+01 2.551276270401772628e+00 -1.958523997957880014e-01
3.400000000000000000e+01 2.551276270401772628e+00 -4.528575177952573583e+00
3.500000000000000000e+01 2.551276270401772628e+00 1.848406505396658905e-01
3.600000000000000000e+01 2.551276270401772628e+00 -2.550112007851309537e-01
3.700000000000000000e+01 2.551276270401772628e+00 -7.838874152002471618e+00
3.800000000000000000e+01 2.551276270401772628e+00 1.846638608655384317e-01
3.900000000000000000e+01 2.551276270401772628e+00 2.985990424555334810e-01
4.000000000000000000e+01 2.551276270401772628e+00 -7.242328837800024566e+00
4.100000000000000000e+01 2.551276270401772628e+00 -3.253923447205111508e-01
4.200000000000000000e+01 2.551276270401772628e+00 -6.531025472863972725e-01
4.300000000000000000e+01 2.551276270401772628e+00 -8.552626049683292209e+00
4.400000000000000000e+01 2.551276270401772628e+00 -1.291163679338212189e+00
4.500000000000000000e+01 2.551276270401772628e+00 -2.365486836402907134e+00
4.600000000000000000e+01 2.551276270401772628e+00 -3.504221500844594051e+00
4.700000000000000000e+01 2.551276270401772628e+00 -6.520036083903040236e-01
4.800000000000000000e+01 2.551276270401772628e+00 -2.733164655015758893e+00
4.900000000000000000e+01 2.551276270401772628e+00 -1.552276275983951681e+00
5.000000000000000000e+01 2.551276270401772628e+00 -1.538823739759205833e-01
0.000000000000000000e+00 2.634609603735106109e+00 4.387814243374599243e-01
1.000000000000000000e+00 2.634609603735106109e+00 2.817216650785095422e-01
2.000000000000000000e+00 2.634609603735106109e+00 -4.531787157417739742e+00
3.000000000000000000e+00 2.634609603735106109e+00 1.652269899780235640e+00
4.000000000000000000e+00 2.634609603735106109e+00 1.657684832191141489e+00
5.000000000000000000e+00 2.634609603735106109e+00 -2.951830024179520784e+00
6.000000000000000000e+00 2.634609603735106109e+00 2.651968414454680900e+00
7.000000000000000000e+00 2.634609603735106109e+00 1.650032819036271192e+00
8.000000000000000000e+00 2.634609603735106109e+00 1.169187002513764506e+00
9.000000000000000000e+00 2.634609603735106109e+00 3.423887408549022293e+00
1.000000000000000000e+01 2.634609603735106109e+00 -4.840418708273927506e-01
1.100000000000000000e+01 2.634609603735106109e+00 3.305188396800990525e+00
1.200000000000000000e+01 2.634609603735106109e+00 3.779564041352778236e+00
1.300000000000000000e+01 2.634609603735106109e+00 -6.672665437565142632e+00
1.400000000000000000e+01 2.634609603735106109e+00 3.958707937795632681e+00
1.500000000000000000e+01 2.634609603735106109e+00 3.698458252602380369e+00
1.600000000000000000e+01 2.634609603735106109e+00 -4.573121171932189810e+00
1.700000000000000000e+01 2.634609603735106109e+00 3.408806091774674751e+00
1.800000000000000000e+01 2.634609603735106109e+00 3.069431891041889404e+00
1.900000000000000000e+01 2.634609603735106109e+00 -3.809724647186516933e+00
2.000000000000000000e+01 2.634609603735106109e+00 1.842830875962039094e+00
2.100000000000000000e+01 2.634609603735106109e+00 2.168398472063084892e+00
2.200000000000000000e+01 2.634609603735106109e+00 -8.257949040124711315e-01
2.300000000000000000e+01 2.634609603735106109e+00 3.869850463246093247e-02
2.400000000000000000e+01 2.634609603735106109e+00 1.812082786494976228e+00
2.500000000000000000e+01 2.634609603735106109e+00 2.248768986490687349e-01
2.600000000000000000e+01 2.634609603735106109e+00 -8.402086469933552904e-01
2.700000000000000000e+01 2.634609603735106109e+00 1.721850367681317717e+00
2.800000000000000000e+01 2.634609603735106109e+00 -3.238789033897588460e-02
2.900000000000000000e+01 2.634609603735106109e+00 -8.733896312301473452e-01
3.000000000000000000e+01 2.634609603735106109e+00 8.964274465771877587e-01
3.100000000000000000e+01 2.634609603735106109e+00 -3.045714647742153502e+00
3.200000000000000000e+01 2.634609603735106109e+00 -3.711516239688905094e-01
3.300000000000000000e+01 2.634609603735106109e+00 -3.720729976318656873e-01
3.400000000000000000e+01 2.634609603735106109e+00 -4.865837298152106527e+00
3.500000000000000000e+01 2.634609603735106109e+00 2.316124593913029828e-01
3.600000000000000000e+01 2.634609603735106109e+00 -1.718703546044092756e-01
3.700000000000000000e+01 2.634609603735106109e+00 -6.679313984665461668e+00
3.800000000000000000e+01 2.634609603735106109e+00 2.949488430456049248e-01
3.900000000000000000e+01 2.634609603735106109e+00 3.490841681737610891e-01
4.000000000000000000e+01 2.634609603735106109e+00 -5.664773535270985150e+00
4.100000000000000000e+01 2.634609603735106109e+00 -5.761947525911053081e-01
4.200000000000000000e+01 2.634609603735106109e+00 -6.007699248605835596e-01
4.300000000000000000e+01 2.634609603735106109e+00 -9.628296959773603447e+00
4.400000000000000000e+01 2.634609603735106109e+00 -1.629815813471834574e+00
4.500000000000000000e+01 2.634609603735106109e+00 -2.693972109638691048e+00
4.600000000000000000e+01 2.634609603735106109e+00 -3.307506364891899864e+00
4.700000000000000000e+01 2.634609603735106109e+00 -8.412888820846448068e-01
4.800000000000000000e+01 2.634609603735106109e+00 -3.316209594605191491e+00
4.900000000000000000e+01 2.634609603735106109e+00 -1.590410348056457090e+00
5.000000000000000000e+01 2.634609603735106109e+00 -2.490854745484746280e-01
0.000000000000000000e+00 2.717942937068439146e+00 6.029138125404792659e-01
1.000000000000000000e+00 2.717942937068439146e+00 -5.554581617919653047e-02
2.000000000000000000e+00 2.717942937068439146e+00 -2.655685643471493940e+00
3.000000000000000000e+00 2.717942937068439146e+00 1.653178077522145628e+00
4.000000000000000000e+00 2.717942937068439146e+00 1.241295045659280172e+00
5.000000000000000000e+00 2.717942937068439146e+00 -2.080468567585764816e+00
6.000000000000000000e+00 2.717942937068439146e+00 2.292934789518130234e+00
7.000000000000000000e+00 2.717942937068439146e+00 8.942455039314033405e-01
8.000000000000000000e+00 2.717942937068439146e+00 1.007134750626843323e+00
9.000000000000000000e+00 2.717942937068439146e+00 2.875883523370894146e+00
1.000000000000000000e+01 2.717942937068439146e+00 -2.069219637200052198e+00
1.100000000000000000e+01 2.717942937068439146e+00 3.051903180124884152e+00
1.200000000000000000e+01 2.717942937068439146e+00 3.391697541172139729e+00
1.300000000000000000e+01 2.717942937068439146e+00 -5.083217904151713817e+00
1.400000000000000000e+01 2.717942937068439146e+00 3.750463154316100667e+00
1.500000000000000000e+01 2.717942937068439146e+00 3.610210999423290268e+00
1.600000000000000000e+01 2.717942937068439146e+00 -9.554432289090788899e+00
1.700000000000000000e+01 2.717942937068439146e+00 3.208567409632860912e+00
1.800000000000000000e+01 2.717942937068439146e+00 3.200648442417977968e+00
1.900000000000000000e+01 2.717942937068439146e+00 -1.574707895251995282e+00
2.000000000000000000e+01 2.717942937068439146e+00 1.651061738219301578e+00
2.100000000000000000e+01 2.717942937068439146e+00 2.324249594742017866e+00
2.200000000000000000e+01 2.717942937068439146e+00 -3.818849900086137006e-01
2.300000000000000000e+01 2.717942937068439146e+00 -4.252198990390049921e-03
2.400000000000000000e+01 2.717942937068439146e+00 1.814999144616217697e+00
2.500000000000000000e+01 2.717942937068439146e+00 1.626026653594962457e-01
2.600000000000000000e+01 2.717942937068439146e+00 -1.034855730964830745e+00
2.700000000000000000e+01 2.717942937068439146e+00 1.529315150084866293e+00
2.800000000000000000e+01 2.717942937068439146e+00 -2.837249575245159167e-02
2.900000000000000000e+01 2.717942937068439146e+00 -1.781294618926153150e+00
3.000000000000000000e+01 2.717942937068439146e+00 4.659767352589667122e-01
3.100000000000000000e+01 2.717942937068439146e+00 -2.728601637213536879e+00
3.200000000000000000e+01 2.717942937068439146e+00 -1.107598044799329218e+00
3.300000000000000000e+01 2.717942937068439146e+00 -8.591487475670563922e-01
3.400000000000000000e+01 2.717942937068439146e+00 -4.695866841247561041e+00
3.500000000000000000e+01 2.717942937068439146e+00 1.425952108178541455e-01
3.600000000000000000e+01 2.717942937068439146e+00 -2.691853512127643788e-01
3.700000000000000000e+01 2.717942937068439146e+00 -6.011151583338540938e+00
3.800000000000000000e+01 2.717942937068439146e+00 3.014974362335270386e-01
3.900000000000000000e+01 2.717942937068439146e+00 3.666255598768866641e-01
4.000000000000000000e+01 2.717942937068439146e+00 -4.439939522215035517e+00
4.100000000000000000e+01 2.717942937068439146e+00 -9.742456851041693122e-01
4.200000000000000000e+01 2.717942937068439146e+00 -6.734082897055669870e-01
4.300000000000000000e+01 2.717942937068439146e+00 -5.897240448515020717e+00
4.400000000000000000e+01 2.717942937068439146e+00 -2.381166899658436531e+00
4.500000000000000000e+01 2.717942937068439146e+00 -3.435801469419172083e+00
4.600000000000000000e+01 2.717942937068439146e+00 -3.304907482996447765e+00
4.700000000000000000e+01 2.717942937068439146e+00 -1.199237655583256457e+00
4.800000000000000000e+01 2.717942937068439146e+00 -4.164516099733686083e+00
4.900000000000000000e+01 2.717942937068439146e+00 -1.646046457397663421e+00
5.000000000000000000e+01 2.717942937068439146e+00 -3.693350548065232331e-01
0.000000000000000000e+00 2.801276270401772628e+00 6.193952071297524897e-01
1.000000000000000000e+00 2.801276270401772628e+00 -5.847791242848525695e-01
2.000000000000000000e+00 2.801276270401772628e+00 -1.773134678664358699e+00
3.000000000000000000e+00 2.801276270401772628e+00 1.490523768284606199e+00
4.000000000000000000e+00 2.801276270401772628e+00 7.222610618754267131e-01
5.000000000000000000e+00 2.801276270401772628e+00 -1.960660677921903350e+00
6.000000000000000000e+00 2.801276270401772628e+00 1.731746324749576349e+00
7.000000000000000000e+00 2.801276270401772628e+00 -5.979586215545765887e-02
8.000000000000000000e+00 2.801276270401772628e+00 6.029688689341362595e-01
9.000000000000000000e+00 2.801276270401772628e+00 2.093465308758172938e+00
1.000000000000000000e+01 2.801276270401772628e+00 -6.000604743729348378e+00
1.100000000000000000e+01 2.801276270401772628e+00 2.706674602286351039e+00
1.200000000000000000e+01 2.801276270401772628e+00 2.843751708542203271e+00
1.300000000000000000e+01 2.801276270401772628e+00 -3.497029023851442098e+00
1.400000000000000000e+01 2.801276270401772628e+00 3.482064196967937342e+00
1.500000000000000000e+01 2.801276270401772628e+00 3.416694719892387599e+00
1.600000000000000000e+01 2.801276270401772628e+00 -4.364801871496313268e+00
1.700000000000000000e+01 2.801276270401772628e+00 2.905242187335676629e+00
1.800000000000000000e+01 2.801276270401772628e+00 3.188195601428452264e+00
1.900000000000000000e+01 2.801276270401772628e+00 -4.729475469600226134e-01
2.000000000000000000e+01 2.801276270401772628e+00 1.232305708016950829e+00
2.100000000000000000e+01 2.801276270401772628e+00 2.277981292547227365e+00
2.200000000000000000e+01 2.801276270401772628e+00 -9.854757041674513940e-02
2.300000000000000000e+01 2.801276270401772628e+00 -3.426525783019062632e-01
2.400000000000000000e+01 2.801276270401772628e+00 1.653295051445805575e+00
2.500000000000000000e+01 2.801276270401772628e+00 5.549707348056572009e-02
2.600000000000000000e+01 2.801276270401772628e+00 -1.484811830033051949e+00
2.700000000000000000e+01 2.801276270401772628e+00 1.239479415710150301e+00
2.800000000000000000e+01 2.801276270401772628e+00 -3.849772565875746178e-02
2.900000000000000000e+01 2.801276270401772628e+00 -3.353166096783088079e+00
3.000000000000000000e+01 2.801276270401772628e+00 -1.727266657020008478e-01
3.100000000000000000e+01 2.801276270401772628e+00 -2.651345878648581067e+00
3.200000000000000000e+01 2.801276270401772628e+00 -2.268168467322342785e+00
3.300000000000000000e+01 2.801276270401772628e+00 -1.812938120356766714e+00
3.400000000000000000e+01 2.801276270401772628e+00 -4.052337318572910796e+00
3.500000000000000000e+01 2.801276270401772628e+00 -5.750501596228263512e-02
3.600000000000000000e+01 2.801276270401772628e+00 -5.493507812357398823e-01
3.700000000000000000e+01 2.801276270401772628e+00 -5.423767824362070833e+00
3.800000000000000000e+01 2.801276270401772628e+00 2.262370114528401421e-01
3.900000000000000000e+01 2.801276270401772628e+00 3.449175716401801095e-01
4.000000000000000000e+01 2.801276270401772628e+00 -3.461291098680715272e+00
4.100000000000000000e+01 2.801276270401772628e+00 -1.586810870657950012e+00
4.200000000000000000e+01 2.801276270401772628e+00 -8.631729648750011696e-01
4.300000000000000000e+01 2.801276270401772628e+00 -4.233265138964317664e+00
4.400000000000000000e+01 2.801276270401772628e+00 -3.900264382805317176e+00
4.500000000000000000e+01 2.801276270401772628e+00 -4.984786906630013448e+00
4.600000000000000000e+01 2.801276270401772628e+00 -3.395850202324444567e+00
4.700000000000000000e+01 2.801276270401772628e+00 -1.750824695941343379e+00
4.800000000000000000e+01 2.801276270401772628e+00 -5.628393209873553182e+00
4.900000000000000000e+01 2.801276270401772628e+00 -1.687089782559487716e+00
5.000000000000000000e+01 2.801276270401772628e+00 -5.088464977153579483e-01
0.000000000000000000e+00 2.884609603735106109e+00 4.972982032843145661e-01
1.000000000000000000e+00 2.884609603735106109e+00 -1.285555064013565563e+00
2.000000000000000000e+00 2.884609603735106109e+00 -1.396780932163023570e+00
3.000000000000000000e+00 2.884609603735106109e+00 1.183503513365997462e+00
4.000000000000000000e+00 2.884609603735106109e+00 1.603531365711164114e-01
5.000000000000000000e+00 2.884609603735106109e+00 -2.482214084780741903e+00
6.000000000000000000e+00 2.884609603735106109e+00 9.265313999108290011e-01
7.000000000000000000e+00 2.884609603735106109e+00 -1.218705746582019245e+00
8.000000000000000000e+00 2.884609603735106109e+00 -1.239666961573719917e-01
9.000000000000000000e+00 2.884609603735106109e+00 9.586358911881751599e-01
1.000000000000000000e+01 2.884609603735106109e+00 -4.462432631219641621e+00
1.100000000000000000e+01 2.884609603735106109e+00 2.263278317027698883e+00
1.200000000000000000e+01 2.884609603735106109e+00 2.100578768331851531e+00
1.300000000000000000e+01 2.884609603735106109e+00 -2.212558245224494069e+00
1.400000000000000000e+01 2.884609603735106109e+00 3.167707557118930595e+00
1.500000000000000000e+01 2.884609603735106109e+00 3.123296352995547753e+00
1.600000000000000000e+01 2.884609603735106109e+00 -3.134938815152021441e+00
1.700000000000000000e+01 2.884609603735106109e+00 2.499360265410422333e+00
1.800000000000000000e+01 2.884609603735106109e+00 3.039545318481437608e+00
1.900000000000000000e+01 2.884609603735106109e+00 1.538074231620045196e-01
2.000000000000000000e+01 2.884609603735106109e+00 5.208156486891671877e-01
2.100000000000000000e+01 2.884609603735106109e+00 2.015664961307706005e+00
2.200000000000000000e+01 2.884609603735106109e+00 8.239606568401275550e-05
2.300000000000000000e+01 2.884609603735106109e+00 -1.019243462852499782e+00
2.400000000000000000e+01 2.884609603735106109e+00 1.302569849591471041e+00
2.500000000000000000e+01 2.884609603735106109e+00 -1.453024760849648822e-01
2.600000000000000000e+01 2.884609603735106109e+00 -2.204547458881851885e+00
2.700000000000000000e+01 2.884609603735106109e+00 8.482223476102133120e-01
2.800000000000000000e+01 2.884609603735106109e+00 -7.284266833093888671e-02
2.900000000000000000e+01 2.884609603735106109e+00 -7.477647935719218708e+00
3.000000000000000000e+01 2.884609603735106109e+00 -1.108241136146943306e+00
3.100000000000000000e+01 2.884609603735106109e+00 -2.761417949876085576e+00
3.200000000000000000e+01 2.884609603735106109e+00 -4.413901380721822143e+00
3.300000000000000000e+01 2.884609603735106109e+00 -3.762905223421056711e+00
3.400000000000000000e+01 2.884609603735106109e+00 -3.189401271299938667e+00
3.500000000000000000e+01 2.884609603735106109e+00 -3.323240624928306963e-01
3.600000000000000000e+01 2.884609603735106109e+00 -1.017611778173271864e+00
3.700000000000000000e+01 2.884609603735106109e+00 -4.779252471313122363e+00
3.800000000000000000e+01 2.884609603735106109e+00 1.014781018045995270e-01
3.900000000000000000e+01 2.884609603735106109e+00 2.917481862487039668e-01
4.000000000000000000e+01 2.884609603735106109e+00 -2.674031660130266719e+00
4.100000000000000000e+01 2.884609603735106109e+00 -2.522183191227139076e+00
4.200000000000000000e+01 2.884609603735106109e+00 -1.160348596486122208e+00
4.300000000000000000e+01 2.884609603735106109e+00 -3.150117802981957649e+00
4.400000000000000000e+01 2.884609603735106109e+00 -8.845977179024114179e+00
4.500000000000000000e+01 2.884609603735106109e+00 -1.094599971155266438e+01
4.600000000000000000e+01 2.884609603735106109e+00 -3.479798423953261999e+00
4.700000000000000000e+01 2.884609603735106109e+00 -2.531331835337438552e+00
4.800000000000000000e+01 2.884609603735106109e+00 -9.655784158418766694e+00
4.900000000000000000e+01 2.884609603735106109e+00 -1.678014164324996838e+00
5.000000000000000000e+01 2.884609603735106109e+00 -6.522933188718703645e-01
0.000000000000000000e+00 2.967942937068439146e+00 2.597360643439419747e-01
1.000000000000000000e+00 2.967942937068439146e+00 -2.100586043320963991e+00
2.000000000000000000e+00 2.967942937068439146e+00 -1.369086750806521868e+00
3.000000000000000000e+00 2.967942937068439146e+00 7.633882423283492313e-01
4.000000000000000000e+00 2.967942937068439146e+00 -3.497442555255086405e-01
5.000000000000000000e+00 2.967942937068439146e+00 -3.932430861579232495e+00
6.000000000000000000e+00 2.967942937068439146e+00 -1.954062553775546829e-01
7.000000000000000000e+00 2.967942937068439146e+00 -2.530119715533228675e+00
8.000000000000000000e+00 2.967942937068439146e+00 -1.367607551392099330e+00
9.000000000000000000e+00 2.967942937068439146e+00 -8.446126880189132047e-01
1.000000000000000000e+01 2.967942937068439146e+00 -2.004773152575000772e+00
1.100000000000000000e+01 2.967942937068439146e+00 1.714574324357757362e+00
1.200000000000000000e+01 2.967942937068439146e+00 1.097470865714726074e+00
1.300000000000000000e+01 2.967942937068439146e+00 -1.233881612060386157e+00
1.400000000000000000e+01 2.967942937068439146e+00 2.824573078214327904e+00
1.500000000000000000e+01 2.967942937068439146e+00 2.743699661223126363e+00
1.600000000000000000e+01 2.967942937068439146e+00 -2.683855461344285320e+00
1.700000000000000000e+01 2.967942937068439146e+00 1.993981691028687386e+00
1.800000000000000000e+01 2.967942937068439146e+00 2.766988551633349669e+00
1.900000000000000000e+01 2.967942937068439146e+00 5.034581382648191106e-01
2.000000000000000000e+01 2.967942937068439146e+00 -6.343499901515023964e-01
2.100000000000000000e+01 2.967942937068439146e+00 1.506942248777463744e+00
2.200000000000000000e+01 2.967942937068439146e+00 -1.156851407360058731e-01
2.300000000000000000e+01 2.967942937068439146e+00 -2.125136688530128382e+00
2.400000000000000000e+01 2.967942937068439146e+00 7.286481909333607510e-01
2.500000000000000000e+01 2.967942937068439146e+00 -5.085430621425670594e-01
2.600000000000000000e+01 2.967942937068439146e+00 -3.157674807133810990e+00
2.700000000000000000e+01 2.967942937068439146e+00 3.680044160394889130e-01
2.800000000000000000e+01 2.967942937068439146e+00 -1.389027526024920745e-01
2.900000000000000000e+01 2.967942937068439146e+00 -5.399321506308011109e+00
3.000000000000000000e+01 2.967942937068439146e+00 -2.527667033496728166e+00
3.100000000000000000e+01 2.967942937068439146e+00 -3.011643240179485925e+00
3.200000000000000000e+01 2.967942937068439146e+00 -1.137656334949786086e+01
3.300000000000000000e+01 2.967942937068439146e+00 -1.171403017292354853e+01
3.400000000000000000e+01 2.967942937068439146e+00 -2.326473213202759016e+00
3.500000000000000000e+01 2.967942937068439146e+00 -6.312119581009525415e-01
3.600000000000000000e+01 2.967942937068439146e+00 -1.677829655501387851e+00
3.700000000000000000e+01 2.967942937068439146e+00 -4.086893861105766135e+00
3.800000000000000000e+01 2.967942937068439146e+00 -3.058447329184925401e-02
3.900000000000000000e+01 2.967942937068439146e+00 2.283529830070432642e-01
4.000000000000000000e+01 2.967942937068439146e+00 -2.041921977246827780e+00
4.100000000000000000e+01 2.967942937068439146e+00 -4.026898792580547948e+00
4.200000000000000000e+01 2.967942937068439146e+00 -1.549277248449384192e+00
4.300000000000000000e+01 2.967942937068439146e+00 -2.376324678684690994e+00
4.400000000000000000e+01 2.967942937068439146e+00 -4.967504610811161569e+00
4.500000000000000000e+01 2.967942937068439146e+00 -5.467390652772429860e+00
4.600000000000000000e+01 2.967942937068439146e+00 -3.465139989432502787e+00
4.700000000000000000e+01 2.967942937068439146e+00 -3.593456186863412505e+00
4.800000000000000000e+01 2.967942937068439146e+00 -7.295034631000977932e+00
4.900000000000000000e+01 2.967942937068439146e+00 -1.596129338617840121e+00
5.000000000000000000e+01 2.967942937068439146e+00 -7.762450822345239310e-01
0.000000000000000000e+00 3.051276270401772628e+00 -5.671499430670893377e-02
1.000000000000000000e+00 3.051276270401772628e+00 -2.916519720154234552e+00
2.000000000000000000e+00 3.051276270401772628e+00 -1.606234014081199923e+00
3.000000000000000000e+00 3.051276270401772628e+00 2.792172745436981574e-01
4.000000000000000000e+00 3.051276270401772628e+00 -7.056343946310550397e-01
5.000000000000000000e+00 3.051276270401772628e+00 -9.155550367512645948e+00
6.000000000000000000e+00 3.051276270401772628e+00 -1.784658534807270991e+00
7.000000000000000000e+00 3.051276270401772628e+00 -3.770529802424529731e+00
8.000000000000000000e+00 3.051276270401772628e+00 -3.847250269760597696e+00
9.000000000000000000e+00 3.051276270401772628e+00 -5.106576213374559359e+00
1.000000000000000000e+01 3.051276270401772628e+00 -9.697546012966808959e-01
1.100000000000000000e+01 3.051276270401772628e+00 1.051631129626173555e+00
1.200000000000000000e+01 3.051276270401772628e+00 -3.073409404398550482e-01
1.300000000000000000e+01 3.051276270401772628e+00 -5.149880886409767822e-01
1.400000000000000000e+01 3.051276270401772628e+00 2.472404638134869881e+00
1.500000000000000000e+01 3.051276270401772628e+00 2.302666501257920384e+00
1.600000000000000000e+01 3.051276270401772628e+00 -2.571220577305147081e+00
1.700000000000000000e+01 3.051276270401772628e+00 1.394768801686092630e+00
1.800000000000000000e+01 3.051276270401772628e+00 2.390074654892171413e+00
1.900000000000000000e+01 3.051276270401772628e+00 6.757332840923896411e-01
2.000000000000000000e+01 3.051276270401772628e+00 -2.737130814374917787e+00
2.100000000000000000e+01 3.051276270401772628e+00 6.847427776020217349e-01
2.200000000000000000e+01 3.051276270401772628e+00 -4.917666004932987889e-01
2.300000000000000000e+01 3.051276270401772628e+00 -3.875439102404405922e+00
2.400000000000000000e+01 3.051276270401772628e+00 -1.232572219444045131e-01
2.500000000000000000e+01 3.051276270401772628e+00 -1.135243119598031036e+00
2.600000000000000000e+01 3.051276270401772628e+00 -4.115522748218593208e+00
2.700000000000000000e+01 3.051276270401772628e+00 -1.539644603836700931e-01
2.800000000000000000e+01 3.051276270401772628e+00 -2.341197204987637837e-01
2.900000000000000000e+01 3.051276270401772628e+00 -3.011475435279522994e+00
3.000000000000000000e+01 3.051276270401772628e+00 -5.027867880515955790e+00
3.100000000000000000e+01 3.051276270401772628e+00 -3.336066622657516412e+00
3.200000000000000000e+01 3.051276270401772628e+00 -4.158221727285492442e+00
3.300000000000000000e+01 3.051276270401772628e+00 -3.436764099382818127e+00
3.400000000000000000e+01 3.051276270401772628e+00 -1.570070596989679323e+00
3.500000000000000000e+01 3.051276270401772628e+00 -8.945968762612788172e-01
3.600000000000000000e+01 3.051276270401772628e+00 -2.525720622139092431e+00
3.700000000000000000e+01 3.051276270401772628e+00 -3.416087428370352175e+00
3.800000000000000000e+01 3.051276270401772628e+00 -1.267264560938708429e-01
3.900000000000000000e+01 3.051276270401772628e+00 1.825703569863551534e-01
4.000000000000000000e+01 3.051276270401772628e+00 -1.536484440136141272e+00
4.100000000000000000e+01 3.051276270401772628e+00 -7.154360381206304353e+00
4.200000000000000000e+01 3.051276270401772628e+00 -2.005051413988343523e+00
4.300000000000000000e+01 3.051276270401772628e+00 -1.813600991077071400e+00
4.400000000000000000e+01 3.051276270401772628e+00 -2.663968422016346427e+00
4.500000000000000000e+01 3.051276270401772628e+00 -3.220429490484900459e+00
4.600000000000000000e+01 3.051276270401772628e+00 -3.303429649745988517e+00
4.700000000000000000e+01 3.051276270401772628e+00 -5.018982778323112903e+00
4.800000000000000000e+01 3.051276270401772628e+00 -4.736911691385423673e+00
4.900000000000000000e+01 3.051276270401772628e+00 -1.446208243537574267e+00
5.000000000000000000e+01 3.051276270401772628e+00 -8.575620886791713859e-01
0.000000000000000000e+00 3.134609603735106109e+00 -4.089959563407381538e-01
1.000000000000000000e+00 3.134609603735106109e+00 -3.584846536746311152e+00
2.000000000000000000e+00 3.134609603735106109e+00 -2.035814430049756929e+00
3.000000000000000000e+00 3.134609603735106109e+00 -2.042111999185330096e-01
4.000000000000000000e+00 3.134609603735106109e+00 -8.630936028090686607e-01
5.000000000000000000e+00 3.134609603735106109e+00 -5.016266670209315492e+00
6.000000000000000000e+00 3.134609603735106109e+00 -4.274422552954541210e+00
7.000000000000000000e+00 3.134609603735106109e+00 -4.469838989267043594e+00
8.000000000000000000e+00 3.134609603735106109e+00 -7.327568504730890275e+00
9.000000000000000000e+00 3.134609603735106109e+00 -3.508571310449878133e+00
1.000000000000000000e+01 3.134609603735106109e+00 -4.712278361810257610e-01
1.100000000000000000e+01 3.134609603735106109e+00 2.611575577525533376e-01
1.200000000000000000e+01 3.134609603735106109e+00 -2.551388498141572647e+00
1.300000000000000000e+01 3.134609603735106109e+00 -9.940798879074399033e-03
1.400000000000000000e+01 3.134609603735106109e+00 2.131871464067792932e+00
1.500000000000000000e+01 3.134609603735106109e+00 1.837311614552605166e+00
1.600000000000000000e+01 3.134609603735106109e+00 -2.591516987439117070e+00
1.700000000000000000e+01 3.134609603735106109e+00 7.100469562797003809e-01
1.800000000000000000e+01 3.134609603735106109e+00 1.937523991219008535e+00
1.900000000000000000e+01 3.134609603735106109e+00 7.388109971880901794e-01
2.000000000000000000e+01 3.134609603735106109e+00 -1.256168915657979923e+01
2.100000000000000000e+01 3.134609603735106109e+00 -6.246416311788068887e-01
2.200000000000000000e+01 3.134609603735106109e+00 -1.218862265256695165e+00
2.300000000000000000e+01 3.134609603735106109e+00 -7.021135309435127425e+00
2.400000000000000000e+01 3.134609603735106109e+00 -1.361190794951300242e+00
2.500000000000000000e+01 3.134609603735106109e+00 -2.219048286135539616e+00
2.600000000000000000e+01 3.134609603735106109e+00 -4.487825472178554875e+00
2.700000000000000000e+01 3.134609603735106109e+00 -6.177006793759877157e-01
2.800000000000000000e+01 3.134609603735106109e+00 -3.401298735679508800e-01
2.900000000000000000e+01 3.134609603735106109e+00 -1.983447716753176548e+00
3.000000000000000000e+01 3.134609603735106109e+00 -1.157797117382731145e+01
3.100000000000000000e+01 3.134609603735106109e+00 -3.628423248061888096e+00
3.200000000000000000e+01 3.134609603735106109e+00 -2.476161569792567185e+00
3.300000000000000000e+01 3.134609603735106109e+00 -1.656567736838387539e+00
3.400000000000000000e+01 3.134609603735106109e+00 -9.557526699721630159e-01
3.500000000000000000e+01 3.134609603735106109e+00 -1.072799086862368689e+00
3.600000000000000000e+01 3.134609603735106109e+00 -3.536452191760484975e+00
3.700000000000000000e+01 3.134609603735106109e+00 -2.830288439882425955e+00
3.800000000000000000e+01 3.134609603735106109e+00 -1.593597176462482334e-01
3.900000000000000000e+01 3.134609603735106109e+00 1.761874770482068364e-01
4.000000000000000000e+01 3.134609603735106109e+00 -1.134555930685454683e+00
4.100000000000000000e+01 3.134609603735106109e+00 -8.044414100041445082e+00
4.200000000000000000e+01 3.134609603735106109e+00 -2.494577948100363152e+00
4.300000000000000000e+01 3.134609603735106109e+00 -1.413383710921346514e+00
4.400000000000000000e+01 3.134609603735106109e+00 -1.517887034411915748e+00
4.500000000000000000e+01 3.134609603735106109e+00 -2.027751008614212314e+00
4.600000000000000000e+01 3.134609603735106109e+00 -3.012827048214514303e+00
4.700000000000000000e+01 3.134609603735106109e+00 -6.928592429029117206e+00
4.800000000000000000e+01 3.134609603735106109e+00 -3.524756787454343954e+00
4.900000000000000000e+01 3.134609603735106109e+00 -1.261619448786630793e+00
5.000000000000000000e+01 3.134609603735106109e+00 -8.865761953339147405e-01
0.000000000000000000e+00 3.217942937068439146e+00 -7.638230386669558891e-01
1.000000000000000000e+00 3.217942937068439146e+00 -4.026484341471300965e+00
2.000000000000000000e+00 3.217942937068439146e+00 -2.570007541931713657e+00
3.000000000000000000e+00 3.217942937068439146e+00 -6.256250685966394665e-01
4.000000000000000000e+00 3.217942937068439146e+00 -8.773345879220698640e-01
5.000000000000000000e+00 3.217942937068439146e+00 -2.973153505345344172e+00
6.000000000000000000e+00 3.217942937068439146e+00 -1.163061894039983102e+01
7.000000000000000000e+00 3.217942937068439146e+00 -4.355112365989062262e+00
8.000000000000000000e+00 3.217942937068439146e+00 -2.871826473766085019e+00
9.000000000000000000e+00 3.217942937068439146e+00 -1.321484271119294895e+00
1.000000000000000000e+01 3.217942937068439146e+00 -2.946860744877792260e-01
1.100000000000000000e+01 3.217942937068439146e+00 -6.824794886001874783e-01
1.200000000000000000e+01 3.217942937068439146e+00 -1.081070403802889679e+01
1.300000000000000000e+01 3.217942937068439146e+00 3.215038887863344574e-01
1.400000000000000000e+01 3.217942937068439146e+00 1.821175948088188834e+00
1.500000000000000000e+01 3.217942937068439146e+00 1.393017933928866414e+00
1.600000000000000000e+01 3.217942937068439146e+00 -2.609257033210037768e+00
1.700000000000000000e+01 3.217942937068439146e+00 -4.868747115844131862e-02
1.800000000000000000e+01 3.217942937068439146e+00 1.447582677224201531e+00
1.900000000000000000e+01 3.217942937068439146e+00 7.462282030996200133e-01
2.000000000000000000e+01 3.217942937068439146e+00 -2.842619095948910157e+00
2.100000000000000000e+01 3.217942937068439146e+00 -3.085277145154558642e+00
2.200000000000000000e+01 3.217942937068439146e+00 -2.534208178855677840e+00
2.300000000000000000e+01 3.217942937068439146e+00 -1.168541003840456938e+01
2.400000000000000000e+01 3.217942937068439146e+00 -3.276230988306649383e+00
2.500000000000000000e+01 3.217942937068439146e+00 -4.379149299334607726e+00
2.600000000000000000e+01 3.217942937068439146e+00 -3.874611432126086275e+00
2.700000000000000000e+01 3.217942937068439146e+00 -8.853175748402636325e-01
2.800000000000000000e+01 3.217942937068439146e+00 -4.234112756964479307e-01
2.900000000000000000e+01 3.217942937068439146e+00 -1.477832332924822412e+00
3.000000000000000000e+01 3.217942937068439146e+00 -5.536791261473402948e+00
3.100000000000000000e+01 3.217942937068439146e+00 -3.751342849640293853e+00
3.200000000000000000e+01 3.217942937068439146e+00 -1.588344797573462364e+00
3.300000000000000000e+01 3.217942937068439146e+00 -7.257958611568364748e-01
3.400000000000000000e+01 3.217942937068439146e+00 -4.877926780774279325e-01
3.500000000000000000e+01 3.217942937068439146e+00 -1.150535607979061403e+00
3.600000000000000000e+01 3.217942937068439146e+00 -4.643966713714347883e+00
3.700000000000000000e+01 3.217942937068439146e+00 -2.365922927260491804e+00
3.800000000000000000e+01 3.217942937068439146e+00 -1.305780711032882568e-01
3.900000000000000000e+01 3.217942937068439146e+00 2.123180276393566990e-01
4.000000000000000000e+01 3.217942937068439146e+00 -8.193085443167252846e-01
4.100000000000000000e+01 3.217942937068439146e+00 -4.932171649872950425e+00
4.200000000000000000e+01 3.217942937068439146e+00 -2.986973448487386662e+00
4.300000000000000000e+01 3.217942937068439146e+00 -1.148119372637511404e+00
4.400000000000000000e+01 3.217942937068439146e+00 -8.431087978244645731e-01
4.500000000000000000e+01 3.217942937068439146e+00 -1.284986083038538007e+00
4.600000000000000000e+01 3.217942937068439146e+00 -2.658114617359397691e+00
4.700000000000000000e+01 3.217942937068439146e+00 -9.371031872052109080e+00
4.800000000000000000e+01 3.217942937068439146e+00 -2.856495346370659938e+00
4.900000000000000000e+01 3.217942937068439146e+00 -1.091519916494029019e+00
5.000000000000000000e+01 3.217942937068439146e+00 -8.762952885481767318e-01
0.000000000000000000e+00 3.301276270401772628e+00 -1.116282058909072283e+00
1.000000000000000000e+00 3.301276270401772628e+00 -4.323973971303420427e+00
2.000000000000000000e+00 3.301276270401772628e+00 -3.101913809012227130e+00
3.000000000000000000e+00 3.301276270401772628e+00 -9.609091552930172364e-01
4.000000000000000000e+00 3.301276270401772628e+00 -8.633602405512785793e-01
5.000000000000000000e+00 3.301276270401772628e+00 -2.160455866902092126e+00
6.000000000000000000e+00 3.301276270401772628e+00 -6.895062507021100018e+00
7.000000000000000000e+00 3.301276270401772628e+00 -3.790312203023086912e+00
8.000000000000000000e+00 3.301276270401772628e+00 -1.554800077378071022e+00
9.000000000000000000e+00 3.301276270401772628e+00 -5.269092744879284584e-01
1.000000000000000000e+01 3.301276270401772628e+00 -3.618099717089773293e-01
1.100000000000000000e+01 3.301276270401772628e+00 -1.842183387050765564e+00
1.200000000000000000e+01 3.301276270401772628e+00 -3.806974605118651045e+00
1.300000000000000000e+01 3.301276270401772628e+00 5.154498413492538678e-01
1.400000000000000000e+01 3.301276270401772628e+00 1.551493397436238375e+00
1.500000000000000000e+01 3.301276270401772628e+00 1.010709144054051878e+00
1.600000000000000000e+01 3.301276270401772628e+00 -2.556215555766398584e+00
1.700000000000000000e+01 3.301276270401772628e+00 -8.640745618645057080e-01
1.800000000000000000e+01 3.301276270401772628e+00 9.652442478276023197e-01
1.900000000000000000e+01 3.301276270401772628e+00 7.387018710070522021e-01
2.000000000000000000e+01 3.301276270401772628e+00 -1.102611044339247615e+00
2.100000000000000000e+01 3.301276270401772628e+00 -7.119722698914871195e+00
2.200000000000000000e+01 3.301276270401772628e+00 -5.518055708021951666e+00
2.300000000000000000e+01 3.301276270401772628e+00 -8.669467609043401524e+00
2.400000000000000000e+01 3.301276270401772628e+00 -7.462730928356893223e+00
2.500000000000000000e+01 3.301276270401772628e+00 -9.601068863100504558e+00
2.600000000000000000e+01 3.301276270401772628e+00 -2.760387771313855154e+00
2.700000000000000000e+01 3.301276270401772628e+00 -8.661886921429781117e-01
2.800000000000000000e+01 3.301276270401772628e+00 -4.470719645824740018e-01
2.900000000000000000e+01 3.301276270401772628e+00 -1.260099229419155087e+00
3.000000000000000000e+01 3.301276270401772628e+00 -4.529299195385064536e+00
3.100000000000000000e+01 3.301276270401772628e+00 -3.615304201071290358e+00
3.200000000000000000e+01 3.301276270401772628e+00 -1.043257751109379239e+00
3.300000000000000000e+01 3.301276270401772628e+00 -1.809955115348094168e-01
3.400000000000000000e+01 3.301276270401772628e+00 -1.578842720522929677e-01
3.500000000000000000e+01 3.301276270401772628e+00 -1.154349032013092469e+00
3.600000000000000000e+01 3.301276270401772628e+00 -5.719324263271444941e+00
3.700000000000000000e+01 3.301276270401772628e+00 -2.037158278541929324e+00
3.800000000000000000e+01 3.301276270401772628e+00 -7.089515575027083294e-02
3.900000000000000000e+01 3.301276270401772628e+00 2.717473883902514209e-01
4.000000000000000000e+01 3.301276270401772628e+00 -5.818023012329268662e-01
4.100000000000000000e+01 3.301276270401772628e+00 -3.743741500673914313e+00
4.200000000000000000e+01 3.301276270401772628e+00 -3.473699447220877534e+00
4.300000000000000000e+01 3.301276270401772628e+00 -1.003830290072068365e+00
4.400000000000000000e+01 3.301276270401772628e+00 -4.480759227089308738e-01
4.500000000000000000e+01 3.301276270401772628e+00 -8.157978256499752723e-01
4.600000000000000000e+01 3.301276270401772628e+00 -2.308935329802802805e+00
4.700000000000000000e+01 3.301276270401772628e+00 -1.116347537480175589e+01
4.800000000000000000e+01 3.301276270401772628e+00 -2.537600816186107444e+00
4.900000000000000000e+01 3.301276270401772628e+00 -9.854417729882029020e-01
5.000000000000000000e+01 3.301276270401772628e+00 -8.594895502105497354e-01
0.000000000000000000e+00 3.384609603735105665e+00 -1.494852421802647324e+00
1.000000000000000000e+00 3.384609603735105665e+00 -4.658303887039688007e+00
2.000000000000000000e+00 3.384609603735105665e+00 -3.540544073387515311e+00
3.000000000000000000e+00 3.384609603735105665e+00 -1.243229497357553726e+00
4.000000000000000000e+00 3.384609603735105665e+00 -9.313596803856616368e-01
5.000000000000000000e+00 3.384609603735105665e+00 -1.929939573010143850e+00
6.000000000000000000e+00 3.384609603735105665e+00 -6.164652222967139217e+00
7.000000000000000000e+00 3.384609603735105665e+00 -3.220702325974879265e+00
8.000000000000000000e+00 3.384609603735105665e+00 -9.954824972299923802e-01
9.000000000000000000e+00 3.384609603735105665e+00 -2.804990084311612120e-01
1.000000000000000000e+01 3.384609603735105665e+00 -6.507722981274105534e-01
1.100000000000000000e+01 3.384609603735105665e+00 -3.406990841818337223e+00
1.200000000000000000e+01 3.384609603735105665e+00 -2.166199377975867257e+00
1.300000000000000000e+01 3.384609603735105665e+00 6.052957616261401830e-01
1.400000000000000000e+01 3.384609603735105665e+00 1.323440155533090801e+00
1.500000000000000000e+01 3.384609603735105665e+00 7.092022712674626028e-01
1.600000000000000000e+01 3.384609603735105665e+00 -2.443564833789293900e+00
1.700000000000000000e+01 3.384609603735105665e+00 -1.704130567990224332e+00
1.800000000000000000e+01 3.384609603735105665e+00 5.354820674402219760e-01
1.900000000000000000e+01 3.384609603735105665e+00 7.414593697772832170e-01
2.000000000000000000e+01 3.384609603735105665e+00 -1.854153866563735542e-01
2.100000000000000000e+01 3.384609603735105665e+00 -2.250190171175869391e+00
2.200000000000000000e+01 3.384609603735105665e+00 -6.052378840019096984e+00
2.300000000000000000e+01 3.384609603735105665e+00 -1.131015168132209681e+01
2.400000000000000000e+01 3.384609603735105665e+00 -6.535594344080925211e+00
2.500000000000000000e+01 3.384609603735105665e+00 -3.696482836464952459e+00
2.600000000000000000e+01 3.384609603735105665e+00 -1.688695875168697347e+00
2.700000000000000000e+01 3.384609603735105665e+00 -6.027832647142492561e-01
2.800000000000000000e+01 3.384609603735105665e+00 -3.914435804594187385e-01
2.900000000000000000e+01 3.384609603735105665e+00 -1.206952842724001052e+00
3.000000000000000000e+01 3.384609603735105665e+00 -4.456282218564880715e+00
3.100000000000000000e+01 3.384609603735105665e+00 -3.266091515266882350e+00
3.200000000000000000e+01 3.384609603735105665e+00 -6.868631428442147913e-01
3.300000000000000000e+01 3.384609603735105665e+00 1.366027722343970685e-01
3.400000000000000000e+01 3.384609603735105665e+00 4.742872474697836654e-02
3.500000000000000000e+01 3.384609603735105665e+00 -1.133296474906431595e+00
3.600000000000000000e+01 3.384609603735105665e+00 -6.583306368297752620e+00
3.700000000000000000e+01 3.384609603735105665e+00 -1.846199728483176150e+00
3.800000000000000000e+01 3.384609603735105665e+00 -2.403238786031514779e-02
3.900000000000000000e+01 3.384609603735105665e+00 3.207754947306021287e-01
4.000000000000000000e+01 3.384609603735105665e+00 -4.210439582795890145e-01
4.100000000000000000e+01 3.384609603735105665e+00 -3.103797264979430981e+00
4.200000000000000000e+01 3.384609603735105665e+00 -3.988464834967412553e+00
4.300000000000000000e+01 3.384609603735105665e+00 -9.781062439532322017e-01
4.400000000000000000e+01 3.384609603735105665e+00 -2.533165034076267363e-01
4.500000000000000000e+01 3.384609603735105665e+00 -5.441635966957196757e-01
4.600000000000000000e+01 3.384609603735105665e+00 -2.014793011315888283e+00
4.700000000000000000e+01 3.384609603735105665e+00 -9.881443453042283664e+00
4.800000000000000000e+01 3.384609603735105665e+00 -2.502086263546937861e+00
4.900000000000000000e+01 3.384609603735105665e+00 -9.843188564653364558e-01
5.000000000000000000e+01 3.384609603735105665e+00 -8.759757429899640568e-01
0.000000000000000000e+00 3.467942937068439146e+00 -1.945261950506203430e+00
1.000000000000000000e+00 3.467942937068439146e+00 -5.189284551475513929e+00
2.000000000000000000e+00 3.467942937068439146e+00 -3.873674430793593082e+00
3.000000000000000000e+00 3.467942937068439146e+00 -1.548558786802699982e+00
4.000000000000000000e+00 3.467942937068439146e+00 -1.161600996888102255e+00
5.000000000000000000e+00 3.467942937068439146e+00 -2.118956292895585847e+00
6.000000000000000000e+00 3.467942937068439146e+00 -7.030252468899917062e+00
7.000000000000000000e+00 3.467942937068439146e+00 -2.839859237881892540e+00
8.000000000000000000e+00 3.467942937068439146e+00 -8.518304158149543337e-01
9.000000000000000000e+00 3.467942937068439146e+00 -3.881201028091532113e-01
1.000000000000000000e+01 3.467942937068439146e+00 -1.187029575864440911e+00
1.100000000000000000e+01 3.467942937068439146e+00 -6.221004591818167562e+00
1.200000000000000000e+01 3.467942937068439146e+00 -1.416507387697743869e+00
1.300000000000000000e+01 3.467942937068439146e+00 6.218027677299512446e-01
1.400000000000000000e+01 3.467942937068439146e+00 1.127001718891813109e+00
1.500000000000000000e+01 3.467942937068439146e+00 4.753671397311098890e-01
1.600000000000000000e+01 3.467942937068439146e+00 -2.338651269974622249e+00
1.700000000000000000e+01 3.467942937068439146e+00 -2.503102336908024306e+00
1.800000000000000000e+01 3.467942937068439146e+00 1.941734870327027351e-01
1.900000000000000000e+01 3.467942937068439146e+00 7.632795578293962713e-01
2.000000000000000000e+01 3.467942937068439146e+00 3.832698725503891346e-01
2.100000000000000000e+01 3.467942937068439146e+00 -7.611572974132913005e-01
2.200000000000000000e+01 3.467942937068439146e+00 -2.837928372523188525e+00
2.300000000000000000e+01 3.467942937068439146e+00 -8.569771656382174640e+00
2.400000000000000000e+01 3.467942937068439146e+00 -4.392434389743976375e+00
2.500000000000000000e+01 3.467942937068439146e+00 -2.088569721530145973e+00
2.600000000000000000e+01 3.467942937068439146e+00 -8.456306045119346138e-01
2.700000000000000000e+01 3.467942937068439146e+00 -2.310762029870455370e-01
2.800000000000000000e+01 3.467942937068439146e+00 -2.687875127827497046e-01
2.900000000000000000e+01 3.467942937068439146e+00 -1.230193968123815429e+00
3.000000000000000000e+01 3.467942937068439146e+00 -4.877215194716842284e+00
3.100000000000000000e+01 3.467942937068439146e+00 -2.851292629539603940e+00
3.200000000000000000e+01 3.467942937068439146e+00 -4.556917793561940933e-01
3.300000000000000000e+01 3.467942937068439146e+00 3.020147211401610354e-01
3.400000000000000000e+01 3.467942937068439146e+00 1.430699922315769035e-01
3.500000000000000000e+01 3.467942937068439146e+00 -1.131885968044220814e+00
3.600000000000000000e+01 3.467942937068439146e+00 -7.088503424273264741e+00
3.700000000000000000e+01 3.467942937068439146e+00 -1.792441215622980977e+00
3.800000000000000000e+01 3.467942937068439146e+00 -3.141521423377911099e-02
3.900000000000000000e+01 3.467942937068439146e+00 3.233875454591429999e-01
4.000000000000000000e+01 3.467942937068439146e+00 -3.419807366789296421e-01
4.100000000000000000e+01 3.467942937068439146e+00 -2.727310568281260394e+00
4.200000000000000000e+01 3.467942937068439146e+00 -4.616897848664606840e+00
4.300000000000000000e+01 3.467942937068439146e+00 -1.078669757424382203e+00
4.400000000000000000e+01 3.467942937068439146e+00 -2.223507656080220829e-01
4.500000000000000000e+01 3.467942937068439146e+00 -4.318944920640633844e-01
4.600000000000000000e+01 3.467942937068439146e+00 -1.803091769751663964e+00
4.700000000000000000e+01 3.467942937068439146e+00 -7.809318680698103421e+00
4.800000000000000000e+01 3.467942937068439146e+00 -2.736125660246819802e+00
4.900000000000000000e+01 3.467942937068439146e+00 -1.118363612402615725e+00
5.000000000000000000e+01 3.467942937068439146e+00 -9.597664749358255643e-01
0.000000000000000000e+00 3.551276270401772628e+00 -2.500805726967441966e+00
1.000000000000000000e+00 3.551276270401772628e+00 -5.993224487879159845e+00
2.000000000000000000e+00 3.551276270401772628e+00 -4.194676460390959427e+00
3.000000000000000000e+00 3.551276270401772628e+00 -1.967486359602951707e+00
4.000000000000000000e+00 3.551276270401772628e+00 -1.613840597776388996e+00
5.000000000000000000e+00 3.551276270401772628e+00 -2.691801973115841573e+00
6.000000000000000000e+00 3.551276270401772628e+00 -1.029892123684267524e+01
7.000000000000000000e+00 3.551276270401772628e+00 -2.703814309550141459e+00
8.000000000000000000e+00 3.551276270401772628e+00 -1.023544593501524602e+00
9.000000000000000000e+00 3.551276270401772628e+00 -8.065406617660281219e-01
1.000000000000000000e+01 3.551276270401772628e+00 -2.076422726050905165e+00
1.100000000000000000e+01 3.551276270401772628e+00 -8.174099200806386634e+00
1.200000000000000000e+01 3.551276270401772628e+00 -9.823022288684710723e-01
1.300000000000000000e+01 3.551276270401772628e+00 5.918698044784317380e-01
1.400000000000000000e+01 3.551276270401772628e+00 9.452197637647300477e-01
1.500000000000000000e+01 3.551276270401772628e+00 2.709754951958128766e-01
1.600000000000000000e+01 3.551276270401772628e+00 -2.324330243930107898e+00
1.700000000000000000e+01 3.551276270401772628e+00 -3.139865942775869723e+00
1.800000000000000000e+01 3.551276270401772628e+00 -3.923689488856094143e-02
1.900000000000000000e+01 3.551276270401772628e+00 7.998935853151706299e-01
2.000000000000000000e+01 3.551276270401772628e+00 7.538855171135311339e-01
2.100000000000000000e+01 3.551276270401772628e+00 3.059715768912611017e-02
2.200000000000000000e+01 3.551276270401772628e+00 -1.525308596873348632e+00
2.300000000000000000e+01 3.551276270401772628e+00 -5.632283707119240646e+00
2.400000000000000000e+01 3.551276270401772628e+00 -3.705870964013621371e+00
2.500000000000000000e+01 3.551276270401772628e+00 -1.282040268818763984e+00
2.600000000000000000e+01 3.551276270401772628e+00 -2.522395840558418478e-01
2.700000000000000000e+01 3.551276270401772628e+00 1.211727313411956747e-01
2.800000000000000000e+01 3.551276270401772628e+00 -1.184186221924013599e-01
2.900000000000000000e+01 3.551276270401772628e+00 -1.265738577725695091e+00
3.000000000000000000e+01 3.551276270401772628e+00 -5.546401697621671900e+00
3.100000000000000000e+01 3.551276270401772628e+00 -2.518244261721878097e+00
3.200000000000000000e+01 3.551276270401772628e+00 -3.327717596182461768e-01
3.300000000000000000e+01 3.551276270401772628e+00 3.512675585799960309e-01
3.400000000000000000e+01 3.551276270401772628e+00 1.420206424090487418e-01
3.500000000000000000e+01 3.551276270401772628e+00 -1.175940830252113045e+00
3.600000000000000000e+01 3.551276270401772628e+00 -7.198338048952740209e+00
3.700000000000000000e+01 3.551276270401772628e+00 -1.880047669876735217e+00
3.800000000000000000e+01 3.551276270401772628e+00 -1.255727689976064709e-01
3.900000000000000000e+01 3.551276270401772628e+00 2.494001389820753312e-01
4.000000000000000000e+01 3.551276270401772628e+00 -3.524985488604684969e-01
4.100000000000000000e+01 3.551276270401772628e+00 -2.509830014631583950e+00
4.200000000000000000e+01 3.551276270401772628e+00 -5.511317931922913083e+00
4.300000000000000000e+01 3.551276270401772628e+00 -1.321550785834066710e+00
4.400000000000000000e+01 3.551276270401772628e+00 -3.406924546413011012e-01
4.500000000000000000e+01 3.551276270401772628e+00 -4.599612044624878382e-01
4.600000000000000000e+01 3.551276270401772628e+00 -1.687771508812172527e+00
4.700000000000000000e+01 3.551276270401772628e+00 -6.253610783524717220e+00
4.800000000000000000e+01 3.551276270401772628e+00 -3.261288717665572268e+00
4.900000000000000000e+01 3.551276270401772628e+00 -1.407980709727666424e+00
5.000000000000000000e+01 3.551276270401772628e+00 -1.132125670158981245e+00
0.000000000000000000e+00 3.634609603735105665e+00 -3.143084575854542706e+00
1.000000000000000000e+00 3.634609603735105665e+00 -6.966415074131084850e+00
2.000000000000000000e+00 3.634609603735105665e+00 -4.676764398820703938e+00
3.000000000000000000e+00 3.634609603735105665e+00 -2.596996656203573561e+00
4.000000000000000000e+00 3.634609603735105665e+00 -2.350166535034733606e+00
5.000000000000000000e+00 3.634609603735105665e+00 -3.691280607255490231e+00
6.000000000000000000e+00 3.634609603735105665e+00 -9.764962840738588667e+00
7.000000000000000000e+00 3.634609603735105665e+00 -2.844105253741059602e+00
8.000000000000000000e+00 3.634609603735105665e+00 -1.506873923643113011e+00
9.000000000000000000e+00 3.634609603735105665e+00 -1.593943671441569343e+00
1.000000000000000000e+01 3.634609603735105665e+00 -3.673170212621867936e+00
1.100000000000000000e+01 3.634609603735105665e+00 -4.258042520196253733e+00
1.200000000000000000e+01 3.634609603735105665e+00 -6.771111553251888404e-01
1.300000000000000000e+01 3.634609603735105665e+00 5.366208295953115437e-01
1.400000000000000000e+01 3.634609603735105665e+00 7.594539361697096869e-01
1.500000000000000000e+01 3.634609603735105665e+00 4.937516326520950682e-02
1.600000000000000000e+01 3.634609603735105665e+00 -2.477592333439304184e+00
1.700000000000000000e+01 3.634609603735105665e+00 -3.460592185035562096e+00
1.800000000000000000e+01 3.634609603735105665e+00 -1.642612072983310745e-01
1.900000000000000000e+01 3.634609603735105665e+00 8.402211493771312156e-01
2.000000000000000000e+01 3.634609603735105665e+00 9.907420378219771173e-01
2.100000000000000000e+01 3.634609603735105665e+00 4.937013026383921255e-01
2.200000000000000000e+01 3.634609603735105665e+00 -7.956390036900734541e-01
2.300000000000000000e+01 3.634609603735105665e+00 -4.181365361565092087e+00
2.400000000000000000e+01 3.634609603735105665e+00 -3.572121485446554168e+00
2.500000000000000000e+01 3.634609603735105665e+00 -8.810866161607739944e-01
2.600000000000000000e+01 3.634609603735105665e+00 1.104235422445378478e-01
2.700000000000000000e+01 3.634609603735105665e+00 3.769333012606360112e-01
2.800000000000000000e+01 3.634609603735105665e+00 1.189519820116233771e-02
2.900000000000000000e+01 3.634609603735105665e+00 -1.279126765131273213e+00
3.000000000000000000e+01 3.634609603735105665e+00 -6.110771234302205812e+00
3.100000000000000000e+01 3.634609603735105665e+00 -2.369900233907904052e+00
3.200000000000000000e+01 3.634609603735105665e+00 -3.295991603926882174e-01
3.300000000000000000e+01 3.634609603735105665e+00 2.945630137340018995e-01
3.400000000000000000e+01 3.634609603735105665e+00 5.136084235247415086e-02
3.500000000000000000e+01 3.634609603735105665e+00 -1.274275773852170612e+00
3.600000000000000000e+01 3.634609603735105665e+00 -6.969653961059117719e+00
3.700000000000000000e+01 3.634609603735105665e+00 -2.124203111174707281e+00
3.800000000000000000e+01 3.634609603735105665e+00 -3.316918645968182089e-01
3.900000000000000000e+01 3.634609603735105665e+00 7.607585357478292842e-02
4.000000000000000000e+01 3.634609603735105665e+00 -4.612484575294798494e-01
4.100000000000000000e+01 3.634609603735105665e+00 -2.409828552250182110e+00
4.200000000000000000e+01 3.634609603735105665e+00 -6.991329765064392632e+00
4.300000000000000000e+01 3.634609603735105665e+00 -1.729890948926784189e+00
4.400000000000000000e+01 3.634609603735105665e+00 -6.071224550513741880e-01
4.500000000000000000e+01 3.634609603735105665e+00 -6.216366283263655701e-01
4.600000000000000000e+01 3.634609603735105665e+00 -1.679299897436542066e+00
4.700000000000000000e+01 3.634609603735105665e+00 -5.194814691307057863e+00
4.800000000000000000e+01 3.634609603735105665e+00 -4.138148143455028460e+00
4.900000000000000000e+01 3.634609603735105665e+00 -1.863722785905463919e+00
5.000000000000000000e+01 3.634609603735105665e+00 -1.399671773774796790e+00
0.000000000000000000e+00 3.717942937068439146e+00 -3.746292854447375920e+00
1.000000000000000000e+00 3.717942937068439146e+00 -7.556687701149270353e+00
2.000000000000000000e+00 3.717942937068439146e+00 -5.597447366116618639e+00
3.000000000000000000e+00 3.717942937068439146e+00 -3.571986718271962236e+00
4.000000000000000000e+00 3.717942937068439146e+00 -3.472013732189586754e+00
5.000000000000000000e+00 3.717942937068439146e+00 -5.271955574491136609e+00
6.000000000000000000e+00 3.717942937068439146e+00 -7.376152948393198017e+00
7.000000000000000000e+00 3.717942937068439146e+00 -3.337966945490308035e+00
8.000000000000000000e+00 3.717942937068439146e+00 -2.407119866590642143e+00
9.000000000000000000e+00 3.717942937068439146e+00 -3.016039832188798897e+00
1.000000000000000000e+01 3.717942937068439146e+00 -8.619029312645757557e+00
1.100000000000000000e+01 3.717942937068439146e+00 -2.639340933179445070e+00
1.200000000000000000e+01 3.717942937068439146e+00 -4.224880434879476065e-01
1.300000000000000000e+01 3.717942937068439146e+00 4.698564725561895083e-01
1.400000000000000000e+01 3.717942937068439146e+00 5.537998945551454444e-01
1.500000000000000000e+01 3.717942937068439146e+00 -2.308592456578460461e-01
1.600000000000000000e+01 3.717942937068439146e+00 -2.875063351498823749e+00
1.700000000000000000e+01 3.717942937068439146e+00 -3.392286899409619583e+00
1.800000000000000000e+01 3.717942937068439146e+00 -1.972498981016803099e-01
1.900000000000000000e+01 3.717942937068439146e+00 8.722336384219855354e-01
2.000000000000000000e+01 3.717942937068439146e+00 1.126299607774284839e+00
2.100000000000000000e+01 3.717942937068439146e+00 7.563102346526577868e-01
2.200000000000000000e+01 3.717942937068439146e+00 -3.692894631950709994e-01
2.300000000000000000e+01 3.717942937068439146e+00 -3.291201008596071009e+00
2.400000000000000000e+01 3.717942937068439146e+00 -3.822866116468817133e+00
2.500000000000000000e+01 3.717942937068439146e+00 -7.635404468097249930e-01
2.600000000000000000e+01 3.717942937068439146e+00 2.630561043501628560e-01
2.700000000000000000e+01 3.717942937068439146e+00 4.999045049483031300e-01
2.800000000000000000e+01 3.717942937068439146e+00 8.163151173827479234e-02
2.900000000000000000e+01 3.717942937068439146e+00 -1.267433752570928496e+00
3.000000000000000000e+01 3.717942937068439146e+00 -6.130525425283058993e+00
3.100000000000000000e+01 3.717942937068439146e+00 -2.479895757919030164e+00
3.200000000000000000e+01 3.717942937068439146e+00 -4.747796759658730603e-01
3.300000000000000000e+01 3.717942937068439146e+00 1.225824709763311676e-01
3.400000000000000000e+01 3.717942937068439146e+00 -1.315246223482235965e-01
3.500000000000000000e+01 3.717942937068439146e+00 -1.429482904416335520e+00
3.600000000000000000e+01 3.717942937068439146e+00 -6.515050196280477657e+00
3.700000000000000000e+01 3.717942937068439146e+00 -2.556157395355716400e+00
3.800000000000000000e+01 3.717942937068439146e+00 -6.727760627988145226e-01
3.900000000000000000e+01 3.717942937068439146e+00 -2.148137684679203019e-01
4.000000000000000000e+01 3.717942937068439146e+00 -6.775983823558383579e-01
4.100000000000000000e+01 3.717942937068439146e+00 -2.415606748163388051e+00
4.200000000000000000e+01 3.717942937068439146e+00 -1.044347841942232158e+01
4.300000000000000000e+01 3.717942937068439146e+00 -2.335441848024265354e+00
4.400000000000000000e+01 3.717942937068439146e+00 -1.029990764334873576e+00
4.500000000000000000e+01 3.717942937068439146e+00 -9.204286211977849019e-01
4.600000000000000000e+01 3.717942937068439146e+00 -1.793050148925945830e+00
4.700000000000000000e+01 3.717942937068439146e+00 -4.537783191127260807e+00
4.800000000000000000e+01 3.717942937068439146e+00 -5.490220728169437514e+00
4.900000000000000000e+01 3.717942937068439146e+00 -2.480948176329994315e+00
5.000000000000000000e+01 3.717942937068439146e+00 -1.753686943474249471e+00
0.000000000000000000e+00 3.801276270401772628e+00 -4.049159596364894753e+00
1.000000000000000000e+00 3.801276270401772628e+00 -6.998752142945303234e+00
2.000000000000000000e+00 3.801276270401772628e+00 -7.768899350206676324e+00
3.000000000000000000e+00 3.801276270401772628e+00 -5.202567830403715732e+00
4.000000000000000000e+00 3.801276270401772628e+00 -5.219790984403519296e+00
5.000000000000000000e+00 3.801276270401772628e+00 -7.894171454071116756e+00
6.000000000000000000e+00 3.801276270401772628e+00 -7.040164724210555391e+00
7.000000000000000000e+00 3.801276270401772628e+00 -4.436200322922386086e+00
8.000000000000000000e+00 3.801276270401772628e+00 -4.157307880811539569e+00
9.000000000000000000e+00 3.801276270401772628e+00 -6.645830878738611780e+00
1.000000000000000000e+01 3.801276270401772628e+00 -4.748583230197077398e+00
1.100000000000000000e+01 3.801276270401772628e+00 -1.591909793783958582e+00
1.200000000000000000e+01 3.801276270401772628e+00 -1.903769232237932096e-01
1.300000000000000000e+01 3.801276270401772628e+00 3.981495780432157683e-01
1.400000000000000000e+01 3.801276270401772628e+00 3.179826962303484716e-01
1.500000000000000000e+01 3.801276270401772628e+00 -5.998150177644674397e-01
1.600000000000000000e+01 3.801276270401772628e+00 -3.622975057383721165e+00
1.700000000000000000e+01 3.801276270401772628e+00 -3.029977866086087879e+00
1.800000000000000000e+01 3.801276270401772628e+00 -1.662094129092001327e-01
1.900000000000000000e+01 3.801276270401772628e+00 8.866135097213164729e-01
2.000000000000000000e+01 3.801276270401772628e+00 1.181182252198251126e+00
2.100000000000000000e+01 3.801276270401772628e+00 8.821528214169185311e-01
2.200000000000000000e+01 3.801276270401772628e+00 -1.286577509494038762e-01
2.300000000000000000e+01 3.801276270401772628e+00 -2.685455906739548926e+00
2.400000000000000000e+01 3.801276270401772628e+00 -4.507945392892883874e+00
2.500000000000000000e+01 3.801276270401772628e+00 -8.913695950532315448e-01
2.600000000000000000e+01 3.801276270401772628e+00 2.178772120572673998e-01
2.700000000000000000e+01 3.801276270401772628e+00 4.748618573824001099e-01
2.800000000000000000e+01 3.801276270401772628e+00 6.277183621856305407e-02
2.900000000000000000e+01 3.801276270401772628e+00 -1.250470273773797603e+00
3.000000000000000000e+01 3.801276270401772628e+00 -5.534736388125220508e+00
3.100000000000000000e+01 3.801276270401772628e+00 -2.929662125488652791e+00
3.200000000000000000e+01 3.801276270401772628e+00 -8.094300592887566648e-01
3.300000000000000000e+01 3.801276270401772628e+00 -1.894479533862856724e-01
3.400000000000000000e+01 3.801276270401772628e+00 -4.218007947888635090e-01
3.500000000000000000e+01 3.801276270401772628e+00 -1.650954804857564406e+00
3.600000000000000000e+01 3.801276270401772628e+00 -5.987474827165947922e+00
3.700000000000000000e+01 3.801276270401772628e+00 -3.228699861740408128e+00
3.800000000000000000e+01 3.801276270401772628e+00 -1.174988807199908170e+00
3.900000000000000000e+01 3.801276270401772628e+00 -6.416516974810941853e-01
4.000000000000000000e+01 3.801276270401772628e+00 -1.013684122494666440e+00
4.100000000000000000e+01 3.801276270401772628e+00 -2.532678590483306902e+00
4.200000000000000000e+01 3.801276270401772628e+00 -9.989720939418111456e+00
4.300000000000000000e+01 3.801276270401772628e+00 -3.186507421494865433e+00
4.400000000000000000e+01 3.801276270401772628e+00 -1.628088512128931020e+00
4.500000000000000000e+01 3.801276270401772628e+00 -1.371905696514049477e+00
4.600000000000000000e+01 3.801276270401772628e+00 -2.056719433912676642e+00
4.700000000000000000e+01 3.801276270401772628e+00 -4.243891482227986067e+00
4.800000000000000000e+01 3.801276270401772628e+00 -7.569165854927215165e+00
4.900000000000000000e+01 3.801276270401772628e+00 -3.222234549886681787e+00
5.000000000000000000e+01 3.801276270401772628e+00 -2.167471731014650072e+00
0.000000000000000000e+00 3.884609603735105665e+00 -3.827042108111281760e+00
1.000000000000000000e+00 3.884609603735105665e+00 -5.629377260115204784e+00
2.000000000000000000e+00 3.884609603735105665e+00 -1.030847402252491385e+01
3.000000000000000000e+00 3.884609603735105665e+00 -9.110973346535335082e+00
4.000000000000000000e+00 3.884609603735105665e+00 -8.560058034091355239e+00
5.000000000000000000e+00 3.884609603735105665e+00 -1.412105227459090173e+01
6.000000000000000000e+00 3.884609603735105665e+00 -8.489203927127265459e+00
7.000000000000000000e+00 3.884609603735105665e+00 -7.448577049210211243e+00
8.000000000000000000e+00 3.884609603735105665e+00 -1.305608377784303187e+01
9.000000000000000000e+00 3.884609603735105665e+00 -5.170395895606949566e+00
1.000000000000000000e+01 3.884609603735105665e+00 -2.366126165940260595e+00
1.100000000000000000e+01 3.884609603735105665e+00 -8.276153173656189965e-01
1.200000000000000000e+01 3.884609603735105665e+00 2.217302948463791695e-02
1.300000000000000000e+01 3.884609603735105665e+00 3.234259509389588172e-01
1.400000000000000000e+01 3.884609603735105665e+00 4.965211582028528775e-02
1.500000000000000000e+01 3.884609603735105665e+00 -1.074044581366523587e+00
1.600000000000000000e+01 3.884609603735105665e+00 -4.948491705280360975e+00
1.700000000000000000e+01 3.884609603735105665e+00 -2.552515134076655645e+00
1.800000000000000000e+01 3.884609603735105665e+00 -1.038131719223592958e-01
1.900000000000000000e+01 3.884609603735105665e+00 8.783061114080719101e-01
2.000000000000000000e+01 3.884609603735105665e+00 1.173330483605193209e+00
2.100000000000000000e+01 3.884609603735105665e+00 9.143667665715700110e-01
2.200000000000000000e+01 3.884609603735105665e+00 -1.659929277167218088e-03
2.300000000000000000e+01 3.884609603735105665e+00 -2.223080067592159814e+00
2.400000000000000000e+01 3.884609603735105665e+00 -6.015930933915037748e+00
2.500000000000000000e+01 3.884609603735105665e+00 -1.275822309013371791e+00
2.600000000000000000e+01 3.884609603735105665e+00 -2.579608261575654787e-02
2.700000000000000000e+01 3.884609603735105665e+00 2.933294132340070193e-01
2.800000000000000000e+01 3.884609603735105665e+00 -6.272845648490295301e-02
2.900000000000000000e+01 3.884609603735105665e+00 -1.257650321375342051e+00
3.000000000000000000e+01 3.884609603735105665e+00 -4.689639907538068364e+00
3.100000000000000000e+01 3.884609603735105665e+00 -3.877462437172901399e+00
3.200000000000000000e+01 3.884609603735105665e+00 -1.393514943705886688e+00
3.300000000000000000e+01 3.884609603735105665e+00 -6.818395434886483919e-01
3.400000000000000000e+01 3.884609603735105665e+00 -8.499587891928462868e-01
3.500000000000000000e+01 3.884609603735105665e+00 -1.965564542691296879e+00
3.600000000000000000e+01 3.884609603735105665e+00 -5.544721279796315017e+00
3.700000000000000000e+01 3.884609603735105665e+00 -4.227186778296975866e+00
3.800000000000000000e+01 3.884609603735105665e+00 -1.871637683933909724e+00
3.900000000000000000e+01 3.884609603735105665e+00 -1.227133444189953293e+00
4.000000000000000000e+01 3.884609603735105665e+00 -1.487042623953084286e+00
4.100000000000000000e+01 3.884609603735105665e+00 -2.777790396534900452e+00
4.200000000000000000e+01 3.884609603735105665e+00 -7.327444801460318402e+00
4.300000000000000000e+01 3.884609603735105665e+00 -4.374110939064916437e+00
4.400000000000000000e+01 3.884609603735105665e+00 -2.439248386742311592e+00
4.500000000000000000e+01 3.884609603735105665e+00 -2.011639153710420125e+00
4.600000000000000000e+01 3.884609603735105665e+00 -2.520778565841884422e+00
4.700000000000000000e+01 3.884609603735105665e+00 -4.335355229000588118e+00
4.800000000000000000e+01 3.884609603735105665e+00 -1.080802946798014474e+01
4.900000000000000000e+01 3.884609603735105665e+00 -3.979685157864127465e+00
5.000000000000000000e+01 3.884609603735105665e+00 -2.591526308573390391e+00
0.000000000000000000e+00 3.967942937068439146e+00 -3.170809015618334836e+00
1.000000000000000000e+00 3.967942937068439146e+00 -4.225500530374958430e+00
2.000000000000000000e+00 3.967942937068439146e+00 -5.755724905557503490e+00
3.000000000000000000e+00 3.967942937068439146e+00 -7.874056179248576370e+00
4.000000000000000000e+00 3.967942937068439146e+00 -1.073471021535715408e+01
5.000000000000000000e+00 3.967942937068439146e+00 -1.888286133528063360e+01
6.000000000000000000e+00 3.967942937068439146e+00 -1.019481051712424957e+01
7.000000000000000000e+00 3.967942937068439146e+00 -6.652217654548529424e+00
8.000000000000000000e+00 3.967942937068439146e+00 -4.184513256739744058e+00
9.000000000000000000e+00 3.967942937068439146e+00 -2.387126056091941617e+00
1.000000000000000000e+01 3.967942937068439146e+00 -1.101515475919062625e+00
1.100000000000000000e+01 3.967942937068439146e+00 -2.460648068826258306e-01
1.200000000000000000e+01 3.967942937068439146e+00 2.103201758846096059e-01
1.300000000000000000e+01 3.967942937068439146e+00 2.476323647603332900e-01
1.400000000000000000e+01 3.967942937068439146e+00 -2.427443092532974578e-01
1.500000000000000000e+01 3.967942937068439146e+00 -1.652616998582116858e+00
1.600000000000000000e+01 3.967942937068439146e+00 -7.728316364770845937e+00
1.700000000000000000e+01 3.967942937068439146e+00 -2.101100045330450250e+00
1.800000000000000000e+01 3.967942937068439146e+00 -4.030371162172153437e-02
1.900000000000000000e+01 3.967942937068439146e+00 8.467734244479863115e-01
2.000000000000000000e+01 3.967942937068439146e+00 1.121934580085318878e+00
2.100000000000000000e+01 3.967942937068439146e+00 8.903556322019740010e-01
2.200000000000000000e+01 3.967942937068439146e+00 6.848031816158411944e-02
2.300000000000000000e+01 3.967942937068439146e+00 -1.815852269306026612e+00
2.400000000000000000e+01 3.967942937068439146e+00 -1.285070062792724777e+01
2.500000000000000000e+01 3.967942937068439146e+00 -1.990553715583362582e+00
2.600000000000000000e+01 3.967942937068439146e+00 -4.890975261326926393e-01
2.700000000000000000e+01 3.967942937068439146e+00 -5.695488368936817147e-02
2.800000000000000000e+01 3.967942937068439146e+00 -3.092932062747267286e-01
2.900000000000000000e+01 3.967942937068439146e+00 -1.319821333975274236e+00
3.000000000000000000e+01 3.967942937068439146e+00 -3.911269983805419237e+00
3.100000000000000000e+01 3.967942937068439146e+00 -5.831709904613007645e+00
3.200000000000000000e+01 3.967942937068439146e+00 -2.334810827552199264e+00
3.300000000000000000e+01 3.967942937068439146e+00 -1.420527750657333277e+00
3.400000000000000000e+01 3.967942937068439146e+00 -1.468541929381137479e+00
3.500000000000000000e+01 3.967942937068439146e+00 -2.426131800927525894e+00
3.600000000000000000e+01 3.967942937068439146e+00 -5.321888360380409466e+00
3.700000000000000000e+01 3.967942937068439146e+00 -5.697414877753095297e+00
3.800000000000000000e+01 3.967942937068439146e+00 -2.804215435893714137e+00
3.900000000000000000e+01 3.967942937068439146e+00 -1.999556927848847643e+00
4.000000000000000000e+01 3.967942937068439146e+00 -2.120716431147053882e+00
4.100000000000000000e+01 3.967942937068439146e+00 -3.172251260292081820e+00
4.200000000000000000e+01 3.967942937068439146e+00 -6.345435554361412045e+00
4.300000000000000000e+01 3.967942937068439146e+00 -6.135779806296699057e+00
4.400000000000000000e+01 3.967942937068439146e+00 -3.549187704387414932e+00
4.500000000000000000e+01 3.967942937068439146e+00 -2.918347019916702312e+00
4.600000000000000000e+01 3.967942937068439146e+00 -3.284628725962788209e+00
4.700000000000000000e+01 3.967942937068439146e+00 -4.931883143337022268e+00
4.800000000000000000e+01 3.967942937068439146e+00 -1.274334504943461432e+01
4.900000000000000000e+01 3.967942937068439146e+00 -4.538468495210554288e+00
5.000000000000000000e+01 3.967942937068439146e+00 -2.952436920371344531e+00
0.000000000000000000e+00 4.051276270401772628e+00 -2.367997327730028356e+00
1.000000000000000000e+00 4.051276270401772628e+00 -3.076249905973551080e+00
2.000000000000000000e+00 4.051276270401772628e+00 -4.064545458732875538e+00
3.000000000000000000e+00 4.051276270401772628e+00 -5.500657826187838495e+00
4.000000000000000000e+00 4.051276270401772628e+00 -8.277674430375713044e+00
5.000000000000000000e+00 4.051276270401772628e+00 -9.299886529708830452e+00
6.000000000000000000e+00 4.051276270401772628e+00 -5.368586340061646034e+00
7.000000000000000000e+00 4.051276270401772628e+00 -3.435282025599432743e+00
8.000000000000000000e+00 4.051276270401772628e+00 -2.058836426749364623e+00
9.000000000000000000e+00 4.051276270401772628e+00 -1.020409868157147848e+00
1.000000000000000000e+01 4.051276270401772628e+00 -2.680225300042834990e-01
1.100000000000000000e+01 4.051276270401772628e+00 2.035457042713227638e-01
1.200000000000000000e+01 4.051276270401772628e+00 3.723459315573471318e-01
1.300000000000000000e+01 4.051276270401772628e+00 1.776153818602096424e-01
1.400000000000000000e+01 4.051276270401772628e+00 -5.365421088570183628e-01
1.500000000000000000e+01 4.051276270401772628e+00 -2.306209112265591887e+00
1.600000000000000000e+01 4.051276270401772628e+00 -9.828179028338489331e+00
1.700000000000000000e+01 4.051276270401772628e+00 -1.749592807522640570e+00
1.800000000000000000e+01 4.051276270401772628e+00 1.533170171632995292e-03
1.900000000000000000e+01 4.051276270401772628e+00 7.954442557149363768e-01
2.000000000000000000e+01 4.051276270401772628e+00 1.047902564209437726e+00
2.100000000000000000e+01 4.051276270401772628e+00 8.455672440546337931e-01
2.200000000000000000e+01 4.051276270401772628e+00 1.297964194068425281e-01
2.300000000000000000e+01 4.051276270401772628e+00 -1.411133497935272541e+00
2.400000000000000000e+01 4.051276270401772628e+00 -5.964786149111441560e+00
2.500000000000000000e+01 4.051276270401772628e+00 -3.270756060956844902e+00
2.600000000000000000e+01 4.051276270401772628e+00 -1.235391984039434288e+00
2.700000000000000000e+01 4.051276270401772628e+00 -6.050517867939824157e-01
2.800000000000000000e+01 4.051276270401772628e+00 -6.971701705141709615e-01
2.900000000000000000e+01 4.051276270401772628e+00 -1.469437012698466605e+00
3.000000000000000000e+01 4.051276270401772628e+00 -3.330360345045904946e+00
3.100000000000000000e+01 4.051276270401772628e+00 -1.609479528309108787e+01
3.200000000000000000e+01 4.051276270401772628e+00 -3.900243298152185289e+00
3.300000000000000000e+01 4.051276270401772628e+00 -2.535007575098243038e+00
3.400000000000000000e+01 4.051276270401772628e+00 -2.374215529329517516e+00
3.500000000000000000e+01 4.051276270401772628e+00 -3.127607787321359467e+00
3.600000000000000000e+01 4.051276270401772628e+00 -5.450497236124919986e+00
3.700000000000000000e+01 4.051276270401772628e+00 -7.906724248430459845e+00
3.800000000000000000e+01 4.051276270401772628e+00 -4.011243781662449770e+00
3.900000000000000000e+01 4.051276270401772628e+00 -2.984845133950328577e+00
4.000000000000000000e+01 4.051276270401772628e+00 -2.934113804424209881e+00
4.100000000000000000e+01 4.051276270401772628e+00 -3.725826695817679557e+00
4.200000000000000000e+01 4.051276270401772628e+00 -5.953037178403199015e+00
4.300000000000000000e+01 4.051276270401772628e+00 -9.649015633799699287e+00
4.400000000000000000e+01 4.051276270401772628e+00 -5.204778640419327473e+00
4.500000000000000000e+01 4.051276270401772628e+00 -4.295490906576623580e+00
4.600000000000000000e+01 4.051276270401772628e+00 -4.594493282700215175e+00
4.700000000000000000e+01 4.051276270401772628e+00 -6.477819221994113974e+00
4.800000000000000000e+01 4.051276270401772628e+00 -9.257838340959203549e+00
4.900000000000000000e+01 4.051276270401772628e+00 -4.657810351846446650e+00
5.000000000000000000e+01 4.051276270401772628e+00 -3.169127338336813704e+00
0.000000000000000000e+00 4.134609603735105665e+00 -1.626431217568324206e+00
1.000000000000000000e+00 4.134609603735105665e+00 -2.213947039694937668e+00
2.000000000000000000e+00 4.134609603735105665e+00 -3.116258962240938235e+00
3.000000000000000000e+00 4.134609603735105665e+00 -4.648166954908919735e+00
4.000000000000000000e+00 4.134609603735105665e+00 -8.931566881074781250e+00
5.000000000000000000e+00 4.134609603735105665e+00 -5.973729497052331361e+00
6.000000000000000000e+00 4.134609603735105665e+00 -3.313747020697785040e+00
7.000000000000000000e+00 4.134609603735105665e+00 -1.851219993332631875e+00
8.000000000000000000e+00 4.134609603735105665e+00 -8.496733060164380902e-01
9.000000000000000000e+00 4.134609603735105665e+00 -1.394728736399709901e-01
1.000000000000000000e+01 4.134609603735105665e+00 3.281340781254759031e-01
1.100000000000000000e+01 4.134609603735105665e+00 5.556688610128635020e-01
1.200000000000000000e+01 4.134609603735105665e+00 5.137727973128891623e-01
1.300000000000000000e+01 4.134609603735105665e+00 1.274497914769516516e-01
1.400000000000000000e+01 4.134609603735105665e+00 -7.934935203792569114e-01
1.500000000000000000e+01 4.134609603735105665e+00 -2.956767448997128067e+00
1.600000000000000000e+01 4.134609603735105665e+00 -6.320998968651180050e+00
1.700000000000000000e+01 4.134609603735105665e+00 -1.525908416080558272e+00
1.800000000000000000e+01 4.134609603735105665e+00 8.043662917675250060e-03
1.900000000000000000e+01 4.134609603735105665e+00 7.303568975174800082e-01
2.000000000000000000e+01 4.134609603735105665e+00 9.716403138106338711e-01
2.100000000000000000e+01 4.134609603735105665e+00 8.110118135149935181e-01
2.200000000000000000e+01 4.134609603735105665e+00 2.179820774509173831e-01
2.300000000000000000e+01 4.134609603735105665e+00 -9.880313277226386859e-01
2.400000000000000000e+01 4.134609603735105665e+00 -3.595787961773240671e+00
2.500000000000000000e+01 4.134609603735105665e+00 -6.266313528610949035e+00
2.600000000000000000e+01 4.134609603735105665e+00 -2.446983061063143339e+00
2.700000000000000000e+01 4.134609603735105665e+00 -1.425370244317976320e+00
2.800000000000000000e+01 4.134609603735105665e+00 -1.268887558410767280e+00
2.900000000000000000e+01 4.134609603735105665e+00 -1.748786698966978914e+00
3.000000000000000000e+01 4.134609603735105665e+00 -2.989935613332747266e+00
3.100000000000000000e+01 4.134609603735105665e+00 -5.938979094014587012e+00
3.200000000000000000e+01 4.134609603735105665e+00 -7.329607060556923237e+00
3.300000000000000000e+01 4.134609603735105665e+00 -4.379195794840927469e+00
3.400000000000000000e+01 4.134609603735105665e+00 -3.790954110694837897e+00
3.500000000000000000e+01 4.134609603735105665e+00 -4.269453827550868219e+00
3.600000000000000000e+01 4.134609603735105665e+00 -6.152718793636688055e+00
3.700000000000000000e+01 4.134609603735105665e+00 -1.109224097064551451e+01
3.800000000000000000e+01 4.134609603735105665e+00 -5.454794819717212917e+00
3.900000000000000000e+01 4.134609603735105665e+00 -4.163995304601210812e+00
4.000000000000000000e+01 4.134609603735105665e+00 -3.904815467041781396e+00
4.100000000000000000e+01 4.134609603735105665e+00 -4.393348471382018339e+00
4.200000000000000000e+01 4.134609603735105665e+00 -5.810543208653139224e+00
4.300000000000000000e+01 4.134609603735105665e+00 -9.777280800050020204e+00
4.400000000000000000e+01 4.134609603735105665e+00 -8.696931738753677976e+00
4.500000000000000000e+01 4.134609603735105665e+00 -6.972218808642694832e+00
4.600000000000000000e+01 4.134609603735105665e+00 -7.533027046254224146e+00
4.700000000000000000e+01 4.134609603735105665e+00 -1.605860938694754125e+01
4.800000000000000000e+01 4.134609603735105665e+00 -6.534878143930369809e+00
4.900000000000000000e+01 4.134609603735105665e+00 -4.309603674305381382e+00
5.000000000000000000e+01 4.134609603735105665e+00 -3.193646250387788932e+00
0.000000000000000000e+00 4.217942937068439591e+00 -1.030957141926371667e+00
1.000000000000000000e+00 4.217942937068439591e+00 -1.611776339865186092e+00
2.000000000000000000e+00 4.217942937068439591e+00 -2.584635644511033004e+00
3.000000000000000000e+00 4.217942937068439591e+00 -4.452076951149362749e+00
4.000000000000000000e+00 4.217942937068439591e+00 -1.444194705457258898e+01
5.000000000000000000e+00 4.217942937068439591e+00 -4.029220525836885614e+00
6.000000000000000000e+00 4.217942937068439591e+00 -1.996446579871675953e+00
7.000000000000000000e+00 4.217942937068439591e+00 -8.155841160243071375e-01
8.000000000000000000e+00 4.217942937068439591e+00 -3.210501584655370277e-02
9.000000000000000000e+00 4.217942937068439591e+00 4.836181989630797262e-01
1.000000000000000000e+01 4.217942937068439591e+00 7.731250123166937271e-01
1.100000000000000000e+01 4.217942937068439591e+00 8.376448105880001105e-01
1.200000000000000000e+01 4.217942937068439591e+00 6.457896876820885534e-01
1.300000000000000000e+01 4.217942937068439591e+00 1.158501372620380360e-01
1.400000000000000000e+01 4.217942937068439591e+00 -9.659150788414078148e-01
1.500000000000000000e+01 4.217942937068439591e+00 -3.461848569853033908e+00
1.600000000000000000e+01 4.217942937068439591e+00 -5.320234790094530375e+00
1.700000000000000000e+01 4.217942937068439591e+00 -1.435427755201541311e+00
1.800000000000000000e+01 4.217942937068439591e+00 -2.673489739488328285e-02
1.900000000000000000e+01 4.217942937068439591e+00 6.579190442044640097e-01
2.000000000000000000e+01 4.217942937068439591e+00 9.091552824326871729e-01
2.100000000000000000e+01 4.217942937068439591e+00 8.078158252689084939e-01
2.200000000000000000e+01 4.217942937068439591e+00 3.504759200432048805e-01
2.300000000000000000e+01 4.217942937068439591e+00 -5.505313481894952288e-01
2.400000000000000000e+01 4.217942937068439591e+00 -2.191248508620049051e+00
2.500000000000000000e+01 4.217942937068439591e+00 -6.291252928422617074e+00
2.600000000000000000e+01 4.217942937068439591e+00 -4.867949060214305845e+00
2.700000000000000000e+01 4.217942937068439591e+00 -2.732905293908514999e+00
2.800000000000000000e+01 4.217942937068439591e+00 -2.128596804134942566e+00
2.900000000000000000e+01 4.217942937068439591e+00 -2.229839334364560610e+00
3.000000000000000000e+01 4.217942937068439591e+00 -2.920358590603985061e+00
3.100000000000000000e+01 4.217942937068439591e+00 -4.357483303621209281e+00
3.200000000000000000e+01 4.217942937068439591e+00 -7.486366329229774408e+00
3.300000000000000000e+01 4.217942937068439591e+00 -9.267445303098350351e+00
3.400000000000000000e+01 4.217942937068439591e+00 -6.587351209253384354e+00
3.500000000000000000e+01 4.217942937068439591e+00 -6.515266950306016547e+00
3.600000000000000000e+01 4.217942937068439591e+00 -8.235031210738162244e+00
3.700000000000000000e+01 4.217942937068439591e+00 -1.156218685731683493e+01
3.800000000000000000e+01 4.217942937068439591e+00 -6.711146562670034399e+00
3.900000000000000000e+01 4.217942937068439591e+00 -5.316620175088114131e+00
4.000000000000000000e+01 4.217942937068439591e+00 -4.850958997972921516e+00
4.100000000000000000e+01 4.217942937068439591e+00 -4.978149124612790466e+00
4.200000000000000000e+01 4.217942937068439591e+00 -5.619045033096036867e+00
4.300000000000000000e+01 4.217942937068439591e+00 -6.762507235280608597e+00
4.400000000000000000e+01 4.217942937068439591e+00 -8.254291774982824847e+00
4.500000000000000000e+01 4.217942937068439591e+00 -9.086215336293067324e+00
4.600000000000000000e+01 4.217942937068439591e+00 -8.008256548113998008e+00
4.700000000000000000e+01 4.217942937068439591e+00 -6.232521360942802069e+00
4.800000000000000000e+01 4.217942937068439591e+00 -4.757861930219426050e+00
4.900000000000000000e+01 4.217942937068439591e+00 -3.710620391036556498e+00
5.000000000000000000e+01 4.217942937068439591e+00 -3.048088541803796403e+00
0.000000000000000000e+00 4.301276270401772628e+00 -5.998715964331952089e-01
1.000000000000000000e+00 4.301276270401772628e+00 -1.236865867182148859e+00
2.000000000000000000e+00 4.301276270401772628e+00 -2.361963232681675962e+00
3.000000000000000000e+00 4.301276270401772628e+00 -4.797588374179280635e+00
4.000000000000000000e+00 4.301276270401772628e+00 -6.873283744679021368e+00
5.000000000000000000e+00 4.301276270401772628e+00 -2.704610222239402173e+00
6.000000000000000000e+00 4.301276270401772628e+00 -1.062748371475073839e+00
7.000000000000000000e+00 4.301276270401772628e+00 -7.830912270875511894e-02
8.000000000000000000e+00 4.301276270401772628e+00 5.569292093006199540e-01
9.000000000000000000e+00 4.301276270401772628e+00 9.434104431215236675e-01
1.000000000000000000e+01 4.301276270401772628e+00 1.115078801893215621e+00
1.100000000000000000e+01 4.301276270401772628e+00 1.071335386602480844e+00
1.200000000000000000e+01 4.301276270401772628e+00 7.802648199279432761e-01
1.300000000000000000e+01 4.301276270401772628e+00 1.586867352302845091e-01
1.400000000000000000e+01 4.301276270401772628e+00 -1.014145408932589865e+00
1.500000000000000000e+01 4.301276270401772628e+00 -3.656424065024573178e+00
1.600000000000000000e+01 4.301276270401772628e+00 -5.137091578937200254e+00
1.700000000000000000e+01 4.301276270401772628e+00 -1.475809835882223808e+00
1.800000000000000000e+01 4.301276270401772628e+00 -1.043659017765228014e-01
1.900000000000000000e+01 4.301276270401772628e+00 5.822394544704352359e-01
2.000000000000000000e+01 4.301276270401772628e+00 8.683590070972496688e-01
2.100000000000000000e+01 4.301276270401772628e+00 8.430634685112998739e-01
2.200000000000000000e+01 4.301276270401772628e+00 5.252920329640238251e-01
2.300000000000000000e+01 4.301276270401772628e+00 -1.156232139905090939e-01
2.400000000000000000e+01 4.301276270401772628e+00 -1.185537471207672722e+00
2.500000000000000000e+01 4.301276270401772628e+00 -3.011391482379381479e+00
2.600000000000000000e+01 4.301276270401772628e+00 -7.652009311720052054e+00
2.700000000000000000e+01 4.301276270401772628e+00 -5.490591496269521699e+00
2.800000000000000000e+01 4.301276270401772628e+00 -3.587199637499947524e+00
2.900000000000000000e+01 4.301276270401772628e+00 -3.069687525962872421e+00
3.000000000000000000e+01 4.301276270401772628e+00 -3.187987704696257474e+00
3.100000000000000000e+01 4.301276270401772628e+00 -3.786497763147954831e+00
3.200000000000000000e+01 4.301276270401772628e+00 -4.857509338991588876e+00
3.300000000000000000e+01 4.301276270401772628e+00 -6.475289293272616042e+00
3.400000000000000000e+01 4.301276270401772628e+00 -8.716673647907224876e+00
3.500000000000000000e+01 4.301276270401772628e+00 -1.085254021484323594e+01
3.600000000000000000e+01 4.301276270401772628e+00 -1.020591324095002328e+01
3.700000000000000000e+01 4.301276270401772628e+00 -8.213199494698265823e+00
3.800000000000000000e+01 4.301276270401772628e+00 -6.713892746745706575e+00
3.900000000000000000e+01 4.301276270401772628e+00 -5.776245853483201742e+00
4.000000000000000000e+01 4.301276270401772628e+00 -5.265740936636376546e+00
4.100000000000000000e+01 4.301276270401772628e+00 -5.071886653551135105e+00
4.200000000000000000e+01 4.301276270401772628e+00 -5.093276039681465583e+00
4.300000000000000000e+01 4.301276270401772628e+00 -5.206056596696908123e+00
4.400000000000000000e+01 4.301276270401772628e+00 -5.250958444889678667e+00
4.500000000000000000e+01 4.301276270401772628e+00 -5.081630715403100851e+00
4.600000000000000000e+01 4.301276270401772628e+00 -4.664986885155483876e+00
4.700000000000000000e+01 4.301276270401772628e+00 -4.103150798831731727e+00
4.800000000000000000e+01 4.301276270401772628e+00 -3.540304762021564411e+00
4.900000000000000000e+01 4.301276270401772628e+00 -3.087168699447025322e+00
5.000000000000000000e+01 4.301276270401772628e+00 -2.815086014033790995e+00
0.000000000000000000e+00 4.384609603735105665e+00 -3.251733642490234333e-01
1.000000000000000000e+00 4.384609603735105665e+00 -1.060566615087369824e+00
2.000000000000000000e+00 4.384609603735105665e+00 -2.408347076390056074e+00
3.000000000000000000e+00 4.384609603735105665e+00 -5.881544557884462066e+00
4.000000000000000000e+00 4.384609603735105665e+00 -4.598983046966812260e+00
5.000000000000000000e+00 4.384609603735105665e+00 -1.741472418951459433e+00
6.000000000000000000e+00 4.384609603735105665e+00 -3.726489214626473867e-01
7.000000000000000000e+00 4.384609603735105665e+00 4.653939347032071128e-01
8.000000000000000000e+00 4.384609603735105665e+00 9.934565500116191439e-01
9.000000000000000000e+00 4.384609603735105665e+00 1.290585101933530376e+00
1.000000000000000000e+01 4.384609603735105665e+00 1.384264818646807171e+00
1.100000000000000000e+01 4.384609603735105665e+00 1.272483396506360886e+00
1.200000000000000000e+01 4.384609603735105665e+00 9.243998260332858541e-01
1.300000000000000000e+01 4.384609603735105665e+00 2.606077110145472164e-01
1.400000000000000000e+01 4.384609603735105665e+00 -9.276581119952544974e-01
1.500000000000000000e+01 4.384609603735105665e+00 -3.477970273887935448e+00
1.600000000000000000e+01 4.384609603735105665e+00 -5.587866269452300472e+00
1.700000000000000000e+01 4.384609603735105665e+00 -1.645559871031828658e+00
1.800000000000000000e+01 4.384609603735105665e+00 -2.254584776474191088e-01
1.900000000000000000e+01 4.384609603735105665e+00 5.032065785242187950e-01
2.000000000000000000e+01 4.384609603735105665e+00 8.477964763178197360e-01
2.100000000000000000e+01 4.384609603735105665e+00 9.104004153530568244e-01
2.200000000000000000e+01 4.384609603735105665e+00 7.268758621065856129e-01
2.300000000000000000e+01 4.384609603735105665e+00 2.979298634497862253e-01
2.400000000000000000e+01 4.384609603735105665e+00 -4.086708967566728412e-01
2.500000000000000000e+01 4.384609603735105665e+00 -1.480617331324080466e+00
2.600000000000000000e+01 4.384609603735105665e+00 -3.159066084846252842e+00
2.700000000000000000e+01 4.384609603735105665e+00 -6.530779831609557995e+00
2.800000000000000000e+01 4.384609603735105665e+00 -7.503633892817111573e+00
2.900000000000000000e+01 4.384609603735105665e+00 -4.761993770297351602e+00
3.000000000000000000e+01 4.384609603735105665e+00 -3.982171552551857285e+00
3.100000000000000000e+01 4.384609603735105665e+00 -3.847772861805668132e+00
3.200000000000000000e+01 4.384609603735105665e+00 -4.075872914524431678e+00
3.300000000000000000e+01 4.384609603735105665e+00 -4.527247188296446900e+00
3.400000000000000000e+01 4.384609603735105665e+00 -5.071330109723054314e+00
3.500000000000000000e+01 4.384609603735105665e+00 -5.542976740775398703e+00
3.600000000000000000e+01 4.384609603735105665e+00 -5.774278157428113900e+00
3.700000000000000000e+01 4.384609603735105665e+00 -5.702147259531180623e+00
3.800000000000000000e+01 4.384609603735105665e+00 -5.413375557037785057e+00
3.900000000000000000e+01 4.384609603735105665e+00 -5.047753146096938259e+00
4.000000000000000000e+01 4.384609603735105665e+00 -4.701536784643745470e+00
4.100000000000000000e+01 4.384609603735105665e+00 -4.409982990609387699e+00
4.200000000000000000e+01 4.384609603735105665e+00 -4.166197977633736116e+00
4.300000000000000000e+01 4.384609603735105665e+00 -3.942448494203943277e+00
4.400000000000000000e+01 4.384609603735105665e+00 -3.708795354840681568e+00
4.500000000000000000e+01 4.384609603735105665e+00 -3.449089910928514247e+00
4.600000000000000000e+01 4.384609603735105665e+00 -3.170133407181841445e+00
4.700000000000000000e+01 4.384609603735105665e+00 -2.900330168290005783e+00
4.800000000000000000e+01 4.384609603735105665e+00 -2.681351871707158274e+00
4.900000000000000000e+01 4.384609603735105665e+00 -2.561004409215138722e+00
5.000000000000000000e+01 4.384609603735105665e+00 -2.593564016069839884e+00
0.000000000000000000e+00 4.467942937068438702e+00 -1.907742126209761857e-01
1.000000000000000000e+00 4.467942937068438702e+00 -1.060156742751479531e+00
2.000000000000000000e+00 4.467942937068438702e+00 -2.721424898837107698e+00
3.000000000000000000e+00 4.467942937068438702e+00 -9.143898165909456921e+00
4.000000000000000000e+00 4.467942937068438702e+00 -3.200351519494571306e+00
5.000000000000000000e+00 4.467942937068438702e+00 -1.015917409753996692e+00
6.000000000000000000e+00 4.467942937068438702e+00 1.489769214690094545e-01
7.000000000000000000e+00 4.467942937068438702e+00 8.736305867932060432e-01
8.000000000000000000e+00 4.467942937068438702e+00 1.321839781986819506e+00
9.000000000000000000e+00 4.467942937068438702e+00 1.556620619204743372e+00
1.000000000000000000e+01 4.467942937068438702e+00 1.600316370096900309e+00
1.100000000000000000e+01 4.467942937068438702e+00 1.450197178980688673e+00
1.200000000000000000e+01 4.467942937068438702e+00 1.077882090556919970e+00
1.300000000000000000e+01 4.467942937068438702e+00 4.116631469223379636e-01
1.400000000000000000e+01 4.467942937068438702e+00 -7.317585408179194673e-01
1.500000000000000000e+01 4.467942937068438702e+00 -3.028204818986851343e+00
1.600000000000000000e+01 4.467942937068438702e+00 -6.945273257553707502e+00
1.700000000000000000e+01 4.467942937068438702e+00 -1.949022437365799831e+00
1.800000000000000000e+01 4.467942937068438702e+00 -3.916440352001353542e-01
1.900000000000000000e+01 4.467942937068438702e+00 4.165654524379113210e-01
2.000000000000000000e+01 4.467942937068438702e+00 8.388385452704555378e-01
2.100000000000000000e+01 4.467942937068438702e+00 9.953216025833667713e-01
2.200000000000000000e+01 4.467942937068438702e+00 9.351209326238588693e-01
2.300000000000000000e+01 4.467942937068438702e+00 6.758270069579839223e-01
2.400000000000000000e+01 4.467942937068438702e+00 2.143845700848829305e-01
2.500000000000000000e+01 4.467942937068438702e+00 -4.738922299383596104e-01
2.600000000000000000e+01 4.467942937068438702e+00 -1.449599283520166981e+00
2.700000000000000000e+01 4.467942937068438702e+00 -2.861031549151840103e+00
2.800000000000000000e+01 4.467942937068438702e+00 -5.196274144363312253e+00
2.900000000000000000e+01 4.467942937068438702e+00 -2.147879762014855487e+01
3.000000000000000000e+01 4.467942937068438702e+00 -6.077509097547334704e+00
3.100000000000000000e+01 4.467942937068438702e+00 -4.641129562007421328e+00
3.200000000000000000e+01 4.467942937068438702e+00 -4.081607156707619311e+00
3.300000000000000000e+01 4.467942937068438702e+00 -3.887640635591353533e+00
3.400000000000000000e+01 4.467942937068438702e+00 -3.872852290613918669e+00
3.500000000000000000e+01 4.467942937068438702e+00 -3.928141359198790372e+00
3.600000000000000000e+01 4.467942937068438702e+00 -3.976167832293296733e+00
3.700000000000000000e+01 4.467942937068438702e+00 -3.966535192544196509e+00
3.800000000000000000e+01 4.467942937068438702e+00 -3.879007174997243457e+00
3.900000000000000000e+01 4.467942937068438702e+00 -3.720022323120018459e+00
4.000000000000000000e+01 4.467942937068438702e+00 -3.510684191535578869e+00
4.100000000000000000e+01 4.467942937068438702e+00 -3.274019054911696980e+00
4.200000000000000000e+01 4.467942937068438702e+00 -3.028146940229577755e+00
4.300000000000000000e+01 4.467942937068438702e+00 -2.785795667442604540e+00
4.400000000000000000e+01 4.467942937068438702e+00 -2.557209634598727188e+00
4.500000000000000000e+01 4.467942937068438702e+00 -2.353634251571407709e+00
4.600000000000000000e+01 4.467942937068438702e+00 -2.189921759557677650e+00
4.700000000000000000e+01 4.467942937068438702e+00 -2.086155903167139058e+00
4.800000000000000000e+01 4.467942937068438702e+00 -2.069263584328887795e+00
4.900000000000000000e+01 4.467942937068438702e+00 -2.176589895630849814e+00
5.000000000000000000e+01 4.467942937068438702e+00 -2.465545780767980588e+00
0.000000000000000000e+00 4.551276270401772628e+00 -1.804246438202500302e-01
1.000000000000000000e+00 4.551276270401772628e+00 -1.220275467517625279e+00
2.000000000000000000e+00 4.551276270401772628e+00 -3.342969168390382162e+00
3.000000000000000000e+00 4.551276270401772628e+00 -7.829559806883343853e+00
4.000000000000000000e+00 4.551276270401772628e+00 -2.218083933340840641e+00
5.000000000000000000e+00 4.551276270401772628e+00 -4.579209355250321578e-01
6.000000000000000000e+00 4.551276270401772628e+00 5.485836506580340499e-01
7.000000000000000000e+00 4.551276270401772628e+00 1.183275066306902490e+00
8.000000000000000000e+00 4.551276270401772628e+00 1.570810627975762763e+00
9.000000000000000000e+00 4.551276270401772628e+00 1.762008368258876523e+00
1.000000000000000000e+01 4.551276270401772628e+00 1.775187270579658305e+00
1.100000000000000000e+01 4.551276270401772628e+00 1.607424508335228763e+00
1.200000000000000000e+01 4.551276270401772628e+00 1.233494896069518010e+00
1.300000000000000000e+01 4.551276270401772628e+00 5.910235439751311270e-01
1.400000000000000000e+01 4.551276270401772628e+00 -4.734857303044716637e-01
1.500000000000000000e+01 4.551276270401772628e+00 -2.471062346031305257e+00
1.600000000000000000e+01 4.551276270401772628e+00 -1.235353666124911065e+01
1.700000000000000000e+01 4.551276270401772628e+00 -2.399198251196151155e+00
1.800000000000000000e+01 4.551276270401772628e+00 -6.051073494488791171e-01
1.900000000000000000e+01 4.551276270401772628e+00 3.162839475341681084e-01
2.000000000000000000e+01 4.551276270401772628e+00 8.302530039440572107e-01
2.100000000000000000e+01 4.551276270401772628e+00 1.081890654335993407e+00
2.200000000000000000e+01 4.551276270401772628e+00 1.132415814924219166e+00
2.300000000000000000e+01 4.551276270401772628e+00 1.009624644397167481e+00
2.400000000000000000e+01 4.551276270401772628e+00 7.233074004621746766e-01
2.500000000000000000e+01 4.551276270401772628e+00 2.696364976098879485e-01
2.600000000000000000e+01 4.551276270401772628e+00 -3.706415893156774777e-01
2.700000000000000000e+01 4.551276270401772628e+00 -1.242302392198400440e+00
2.800000000000000000e+01 4.551276270401772628e+00 -2.447959285883742897e+00
2.900000000000000000e+01 4.551276270401772628e+00 -4.276784444930549434e+00
3.000000000000000000e+01 4.551276270401772628e+00 -8.311724997027365447e+00
3.100000000000000000e+01 4.551276270401772628e+00 -7.246303949727010085e+00
3.200000000000000000e+01 4.551276270401772628e+00 -4.865886249722398027e+00
3.300000000000000000e+01 4.551276270401772628e+00 -3.888130969714727492e+00
3.400000000000000000e+01 4.551276270401772628e+00 -3.368120644508488581e+00
3.500000000000000000e+01 4.551276270401772628e+00 -3.062834120734124976e+00
3.600000000000000000e+01 4.551276270401772628e+00 -2.863923730292648795e+00
3.700000000000000000e+01 4.551276270401772628e+00 -2.710747318801340011e+00
3.800000000000000000e+01 4.551276270401772628e+00 -2.567609055560396314e+00
3.900000000000000000e+01 4.551276270401772628e+00 -2.415968381097226558e+00
4.000000000000000000e+01 4.551276270401772628e+00 -2.250205415853224089e+00
4.100000000000000000e+01 4.551276270401772628e+00 -2.073881104525925334e+00
4.200000000000000000e+01 4.551276270401772628e+00 -1.896278316947075826e+00
4.300000000000000000e+01 4.551276270401772628e+00 -1.729792102950999722e+00
4.400000000000000000e+01 4.551276270401772628e+00 -1.588524423927602403e+00
4.500000000000000000e+01 4.551276270401772628e+00 -1.488050486885135415e+00
4.600000000000000000e+01 4.551276270401772628e+00 -1.446208710072507619e+00
4.700000000000000000e+01 4.551276270401772628e+00 -1.485015642486370968e+00
4.800000000000000000e+01 4.551276270401772628e+00 -1.634497014355311029e+00
4.900000000000000000e+01 4.551276270401772628e+00 -1.940977464050537060e+00
5.000000000000000000e+01 4.551276270401772628e+00 -2.488179564391619358e+00
0.000000000000000000e+00 4.634609603735105665e+00 -2.817533177494509489e-01
1.000000000000000000e+00 4.634609603735105665e+00 -1.536064152376874992e+00
2.000000000000000000e+00 4.634609603735105665e+00 -4.414455481151897231e+00
3.000000000000000000e+00 4.634609603735105665e+00 -4.858983676249919448e+00
4.000000000000000000e+00 4.634609603735105665e+00 -1.490596220122934135e+00
5.000000000000000000e+00 4.634609603735105665e+00 -2.476476419621580910e-02
6.000000000000000000e+00 4.634609603735105665e+00 8.559476964716259406e-01
7.000000000000000000e+00 4.634609603735105665e+00 1.418124765598100856e+00
8.000000000000000000e+00 4.634609603735105665e+00 1.758713278215165321e+00
9.000000000000000000e+00 4.634609603735105665e+00 1.919154698536787107e+00
1.000000000000000000e+01 4.634609603735105665e+00 1.914593677801127658e+00
1.100000000000000000e+01 4.634609603735105665e+00 1.742151450370749588e+00
1.200000000000000000e+01 4.634609603735105665e+00 1.379740382200957072e+00
1.300000000000000000e+01 4.634609603735105665e+00 7.739444888347056795e-01
1.400000000000000000e+01 4.634609603735105665e+00 -2.015427343495041490e-01
1.500000000000000000e+01 4.634609603735105665e+00 -1.928348724530398961e+00
1.600000000000000000e+01 4.634609603735105665e+00 -7.462403702097399893e+00
1.700000000000000000e+01 4.634609603735105665e+00 -3.018946614491207825e+00
1.800000000000000000e+01 4.634609603735105665e+00 -8.656263429103170370e-01
1.900000000000000000e+01 4.634609603735105665e+00 1.982129317362960885e-01
2.000000000000000000e+01 4.634609603735105665e+00 8.128432440002322235e-01
2.100000000000000000e+01 4.634609603735105665e+00 1.157624697538525149e+00
2.200000000000000000e+01 4.634609603735105665e+00 1.306678037601765707e+00
2.300000000000000000e+01 4.634609603735105665e+00 1.295501535503101653e+00
2.400000000000000000e+01 4.634609603735105665e+00 1.140841585813872072e+00
2.500000000000000000e+01 4.634609603735105665e+00 8.475762887484977748e-01
2.600000000000000000e+01 4.634609603735105665e+00 4.101881471133993484e-01
2.700000000000000000e+01 4.634609603735105665e+00 -1.899132700055571332e-01
2.800000000000000000e+01 4.634609603735105665e+00 -9.938699165650405343e-01
2.900000000000000000e+01 4.634609603735105665e+00 -2.093616360048197400e+00
3.000000000000000000e+01 4.634609603735105665e+00 -3.737659309306283983e+00
3.100000000000000000e+01 4.634609603735105665e+00 -7.095468325648755403e+00
3.200000000000000000e+01 4.634609603735105665e+00 -7.406795201408575835e+00
3.300000000000000000e+01 4.634609603735105665e+00 -4.473259163248250125e+00
3.400000000000000000e+01 4.634609603735105665e+00 -3.266020781355330804e+00
3.500000000000000000e+01 4.634609603735105665e+00 -2.566476620495388605e+00
3.600000000000000000e+01 4.634609603735105665e+00 -2.106644451569497090e+00
3.700000000000000000e+01 4.634609603735105665e+00 -1.778955706379159896e+00
3.800000000000000000e+01 4.634609603735105665e+00 -1.528886180740569589e+00
3.900000000000000000e+01 4.634609603735105665e+00 -1.326387713857930972e+00
4.000000000000000000e+01 4.634609603735105665e+00 -1.155604950035560741e+00
4.100000000000000000e+01 4.634609603735105665e+00 -1.010187849970344720e+00
4.200000000000000000e+01 4.634609603735105665e+00 -8.906098949196844528e-01
4.300000000000000000e+01 4.634609603735105665e+00 -8.024169907352604048e-01
4.400000000000000000e+01 4.634609603735105665e+00 -7.551798990428886249e-01
4.500000000000000000e+01 4.634609603735105665e+00 -7.622344350380553246e-01
4.600000000000000000e+01 4.634609603735105665e+00 -8.414875573287524668e-01
4.700000000000000000e+01 4.634609603735105665e+00 -1.017950891229387089e+00
4.800000000000000000e+01 4.634609603735105665e+00 -1.329776927037512158e+00
4.900000000000000000e+01 4.634609603735105665e+00 -1.843269659790401915e+00
5.000000000000000000e+01 4.634609603735105665e+00 -2.697851888960411948e+00
0.000000000000000000e+00 4.717942937068439591e+00 -4.889833625041313803e-01
1.000000000000000000e+00 4.717942937068439591e+00 -2.019275241043063218e+00
2.000000000000000000e+00 4.717942937068439591e+00 -6.471766450579963248e+00
3.000000000000000000e+00 4.717942937068439591e+00 -3.402162532960006036e+00
4.000000000000000000e+00 4.717942937068439591e+00 -9.400233371181909714e-01
5.000000000000000000e+00 4.717942937068439591e+00 3.099710201083847316e-01
6.000000000000000000e+00 4.717942937068439591e+00 1.089244333077964644e+00
7.000000000000000000e+00 4.717942937068439591e+00 1.592155576955045060e+00
8.000000000000000000e+00 4.717942937068439591e+00 1.895570577755268049e+00
9.000000000000000000e+00 4.717942937068439591e+00 2.033637638721922603e+00
1.000000000000000000e+01 4.717942937068439591e+00 2.018929637753275053e+00
1.100000000000000000e+01 4.717942937068439591e+00 1.848612097696048728e+00
1.200000000000000000e+01 4.717942937068439591e+00 1.503243727456546885e+00
1.300000000000000000e+01 4.717942937068439591e+00 9.368550722701693978e-01
1.400000000000000000e+01 4.717942937068439591e+00 4.466844544234960246e-02
1.500000000000000000e+01 4.717942937068439591e+00 -1.465170694041042720e+00
1.600000000000000000e+01 4.717942937068439591e+00 -5.167371404308763516e+00
1.700000000000000000e+01 4.717942937068439591e+00 -3.839497842836054442e+00
1.800000000000000000e+01 4.717942937068439591e+00 -1.165725684395825912e+00
1.900000000000000000e+01 4.717942937068439591e+00 6.345753940004866811e-02
2.000000000000000000e+01 4.717942937068439591e+00 7.822737413734466294e-01
2.100000000000000000e+01 4.717942937068439591e+00 1.215302916831776825e+00
2.200000000000000000e+01 4.717942937068439591e+00 1.451137935572807569e+00
2.300000000000000000e+01 4.717942937068439591e+00 1.532202481769371571e+00
2.400000000000000000e+01 4.717942937068439591e+00 1.479977962933693547e+00
2.500000000000000000e+01 4.717942937068439591e+00 1.303920590547275049e+00
2.600000000000000000e+01 4.717942937068439591e+00 1.004444248097366543e+00
2.700000000000000000e+01 4.717942937068439591e+00 5.725552787472411032e-01
2.800000000000000000e+01 4.717942937068439591e+00 -1.420655100233788118e-02
2.900000000000000000e+01 4.717942937068439591e+00 -8.033709948443396032e-01
3.000000000000000000e+01 4.717942937068439591e+00 -1.901932036424070382e+00
3.100000000000000000e+01 4.717942937068439591e+00 -3.612920861073892986e+00
3.200000000000000000e+01 4.717942937068439591e+00 -7.670477025863775999e+00
3.300000000000000000e+01 4.717942937068439591e+00 -5.987493129415598858e+00
3.400000000000000000e+01 4.717942937068439591e+00 -3.487156525863926770e+00
3.500000000000000000e+01 4.717942937068439591e+00 -2.311485079615065885e+00
3.600000000000000000e+01 4.717942937068439591e+00 -1.585772684939050770e+00
3.700000000000000000e+01 4.717942937068439591e+00 -1.089544930489489527e+00
3.800000000000000000e+01 4.717942937068439591e+00 -7.324947312301707258e-01
3.900000000000000000e+01 4.717942937068439591e+00 -4.694985404944393426e-01
4.000000000000000000e+01 4.717942937068439591e+00 -2.762727581943291710e-01
4.100000000000000000e+01 4.717942937068439591e+00 -1.402473905721329517e-01
4.200000000000000000e+01 4.717942937068439591e+00 -5.654433548428264289e-02
4.300000000000000000e+01 4.717942937068439591e+00 -2.607796315051359726e-02
4.400000000000000000e+01 4.717942937068439591e+00 -5.481894576428735649e-02
4.500000000000000000e+01 4.717942937068439591e+00 -1.540417779978474899e-01
4.600000000000000000e+01 4.717942937068439591e+00 -3.418996063657414042e-01
4.700000000000000000e+01 4.717942937068439591e+00 -6.474909830715817050e-01
4.800000000000000000e+01 4.717942937068439591e+00 -1.120826125033050680e+00
4.900000000000000000e+01 4.717942937068439591e+00 -1.860369598830832194e+00
5.000000000000000000e+01 4.717942937068439591e+00 -3.112988881857838397e+00
0.000000000000000000e+00 4.801276270401772628e+00 -8.060461913779753962e-01
1.000000000000000000e+00 4.801276270401772628e+00 -2.711940843751208252e+00
2.000000000000000000e+00 4.801276270401772628e+00 -1.339536274634934010e+01
3.000000000000000000e+00 4.801276270401772628e+00 -2.468706542829535611e+00
4.000000000000000000e+00 4.801276270401772628e+00 -5.233451323924187548e-01
5.000000000000000000e+00 4.801276270401772628e+00 5.618152466584376281e-01
6.000000000000000000e+00 4.801276270401772628e+00 1.257910855238716819e+00
7.000000000000000000e+00 4.801276270401772628e+00 1.711462893430161225e+00
8.000000000000000000e+00 4.801276270401772628e+00 1.984410337359588050e+00
9.000000000000000000e+00 4.801276270401772628e+00 2.105111967744248691e+00
1.000000000000000000e+01 4.801276270401772628e+00 2.083961228407129607e+00
1.100000000000000000e+01 4.801276270401772628e+00 1.918013114026548172e+00
1.200000000000000000e+01 4.801276270401772628e+00 1.589754855067810446e+00
1.300000000000000000e+01 4.801276270401772628e+00 1.058747013863496678e+00
1.400000000000000000e+01 4.801276270401772628e+00 2.356456712708445700e-01
1.500000000000000000e+01 4.801276270401772628e+00 -1.113342169236878121e+00
1.600000000000000000e+01 4.801276270401772628e+00 -4.006879440133311654e+00
1.700000000000000000e+01 4.801276270401772628e+00 -4.888493522655005030e+00
1.800000000000000000e+01 4.801276270401772628e+00 -1.484966022789430129e+00
1.900000000000000000e+01 4.801276270401772628e+00 -7.988696163690484076e-02
2.000000000000000000e+01 4.801276270401772628e+00 7.394197011255106977e-01
2.100000000000000000e+01 4.801276270401772628e+00 1.252176871247295820e+00
2.200000000000000000e+01 4.801276270401772628e+00 1.562431092293610213e+00
2.300000000000000000e+01 4.801276270401772628e+00 1.719079670235299950e+00
2.400000000000000000e+01 4.801276270401772628e+00 1.747278392055493734e+00
2.500000000000000000e+01 4.801276270401772628e+00 1.659343707890161390e+00
2.600000000000000000e+01 4.801276270401772628e+00 1.458773505639464174e+00
2.700000000000000000e+01 4.801276270401772628e+00 1.140964003499812529e+00
2.800000000000000000e+01 4.801276270401772628e+00 6.911573826552998012e-01
2.900000000000000000e+01 4.801276270401772628e+00 7.794522436999244686e-02
3.000000000000000000e+01 4.801276270401772628e+00 -7.643571346269345534e-01
3.100000000000000000e+01 4.801276270401772628e+00 -1.992235957921251632e+00
3.200000000000000000e+01 4.801276270401772628e+00 -4.129485280837308814e+00
3.300000000000000000e+01 4.801276270401772628e+00 -1.275132891893814602e+01
3.400000000000000000e+01 4.801276270401772628e+00 -4.045570116500967650e+00
3.500000000000000000e+01 4.801276270401772628e+00 -2.246760896921005113e+00
3.600000000000000000e+01 4.801276270401772628e+00 -1.250906479838668428e+00
3.700000000000000000e+01 4.801276270401772628e+00 -6.004047836779626834e-01
3.800000000000000000e+01 4.801276270401772628e+00 -1.481734716298399035e-01
3.900000000000000000e+01 4.801276270401772628e+00 1.711707107321790156e-01
4.000000000000000000e+01 4.801276270401772628e+00 3.911101657128246978e-01
4.100000000000000000e+01 4.801276270401772628e+00 5.293685708093218700e-01
4.200000000000000000e+01 4.801276270401772628e+00 5.942853024330622125e-01
4.300000000000000000e+01 4.801276270401772628e+00 5.874844982762843504e-01
4.400000000000000000e+01 4.801276270401772628e+00 5.046944181276284969e-01
4.500000000000000000e+01 4.801276270401772628e+00 3.351539503621913663e-01
4.600000000000000000e+01 4.801276270401772628e+00 5.916640310505011380e-02
4.700000000000000000e+01 4.801276270401772628e+00 -3.580229524995343637e-01
4.800000000000000000e+01 4.801276270401772628e+00 -9.819164628411722884e-01
4.900000000000000000e+01 4.801276270401772628e+00 -1.957022437456776620e+00
5.000000000000000000e+01 4.801276270401772628e+00 -3.725467850262240699e+00
0.000000000000000000e+00 4.884609603735105665e+00 -1.253061610584827568e+00
1.000000000000000000e+00 4.884609603735105665e+00 -3.727396897694923439e+00
2.000000000000000000e+00 4.884609603735105665e+00 -6.003561556706770830e+00
3.000000000000000000e+00 4.884609603735105665e+00 -1.818914282489483503e+00
4.000000000000000000e+00 4.884609603735105665e+00 -2.156872655140265049e-01
5.000000000000000000e+00 4.884609603735105665e+00 7.385278550073850479e-01
6.000000000000000000e+00 4.884609603735105665e+00 1.364658168693690055e+00
7.000000000000000000e+00 4.884609603735105665e+00 1.775806638131048887e+00
8.000000000000000000e+00 4.884609603735105665e+00 2.022428598054477167e+00
9.000000000000000000e+00 4.884609603735105665e+00 2.128124762203065679e+00
1.000000000000000000e+01 4.884609603735105665e+00 2.101320633680744177e+00
1.100000000000000000e+01 4.884609603735105665e+00 1.938704126634558156e+00
1.200000000000000000e+01 4.884609603735105665e+00 1.623889423566027057e+00
1.300000000000000000e+01 4.884609603735105665e+00 1.120020259418188724e+00
1.400000000000000000e+01 4.884609603735105665e+00 3.476663219757420431e-01
1.500000000000000000e+01 4.884609603735105665e+00 -8.921579158118519981e-01
1.600000000000000000e+01 4.884609603735105665e+00 -3.365515478208641387e+00
1.700000000000000000e+01 4.884609603735105665e+00 -6.132793803855295600e+00
1.800000000000000000e+01 4.884609603735105665e+00 -1.785645597903207760e+00
1.900000000000000000e+01 4.884609603735105665e+00 -2.174843614529543279e-01
2.000000000000000000e+01 4.884609603735105665e+00 6.886159300706983233e-01
2.100000000000000000e+01 4.884609603735105665e+00 1.267786543157772616e+00
2.200000000000000000e+01 4.884609603735105665e+00 1.638350749588903810e+00
2.300000000000000000e+01 4.884609603735105665e+00 1.854708984757970303e+00
2.400000000000000000e+01 4.884609603735105665e+00 1.944822689792728543e+00
2.500000000000000000e+01 4.884609603735105665e+00 1.922910665576826439e+00
2.600000000000000000e+01 4.884609603735105665e+00 1.794270104648115760e+00
2.700000000000000000e+01 4.884609603735105665e+00 1.556643609255337957e+00
2.800000000000000000e+01 4.884609603735105665e+00 1.199159541221743730e+00
2.900000000000000000e+01 4.884609603735105665e+00 6.980525892581036507e-01
3.000000000000000000e+01 4.884609603735105665e+00 5.358668627085109992e-03
3.100000000000000000e+01 4.884609603735105665e+00 -9.836976240926060822e-01
3.200000000000000000e+01 4.884609603735105665e+00 -2.556895767522902929e+00
3.300000000000000000e+01 4.884609603735105665e+00 -6.239274213443927408e+00
3.400000000000000000e+01 4.884609603735105665e+00 -5.082123380905580134e+00
3.500000000000000000e+01 4.884609603735105665e+00 -2.362169885633888633e+00
3.600000000000000000e+01 4.884609603735105665e+00 -1.085448452095324479e+00
3.700000000000000000e+01 4.884609603735105665e+00 -2.936075375854995673e-01
3.800000000000000000e+01 4.884609603735105665e+00 2.418085910635065783e-01
3.900000000000000000e+01 4.884609603735105665e+00 6.110317495989453507e-01
4.000000000000000000e+01 4.884609603735105665e+00 8.576142180736421317e-01
4.100000000000000000e+01 4.884609603735105665e+00 1.004170819381893009e+00
4.200000000000000000e+01 4.884609603735105665e+00 1.061746094163961596e+00
4.300000000000000000e+01 4.884609603735105665e+00 1.033531662370539506e+00
4.400000000000000000e+01 4.884609603735105665e+00 9.159671843426577809e-01
4.500000000000000000e+01 4.884609603735105665e+00 6.979609095439348598e-01
4.600000000000000000e+01 4.884609603735105665e+00 3.576780711254129441e-01
4.700000000000000000e+01 4.884609603735105665e+00 -1.456777187838556864e-01
4.800000000000000000e+01 4.884609603735105665e+00 -8.940403104908243304e-01
4.900000000000000000e+01 4.884609603735105665e+00 -2.085792060932674996e+00
5.000000000000000000e+01 4.884609603735105665e+00 -4.465422804985387017e+00
0.000000000000000000e+00 4.967942937068439591e+00 -1.883207616532168727e+00
1.000000000000000000e+00 4.967942937068439591e+00 -5.430227626057433810e+00
2.000000000000000000e+00 4.967942937068439591e+00 -4.171892373629524364e+00
3.000000000000000000e+00 4.967942937068439591e+00 -1.354354085738924462e+00
4.000000000000000000e+00 4.967942937068439591e+00 -2.415565579723646418e-03
5.000000000000000000e+00 4.967942937068439591e+00 8.424666701835343829e-01
6.000000000000000000e+00 4.967942937068439591e+00 1.407175363813662816e+00
7.000000000000000000e+00 4.967942937068439591e+00 1.779981675149511000e+00
8.000000000000000000e+00 4.967942937068439591e+00 2.002042279307195027e+00
9.000000000000000000e+00 4.967942937068439591e+00 2.092822690128456564e+00
1.000000000000000000e+01 4.967942937068439591e+00 2.058819127274307270e+00
1.100000000000000000e+01 4.967942937068439591e+00 1.896005933008511501e+00
1.200000000000000000e+01 4.967942937068439591e+00 1.588277099929337410e+00
1.300000000000000000e+01 4.967942937068439591e+00 1.100464407878792628e+00
1.400000000000000000e+01 4.967942937068439591e+00 3.581407422683112740e-01
1.500000000000000000e+01 4.967942937068439591e+00 -8.205252924215683530e-01
1.600000000000000000e+01 4.967942937068439591e+00 -3.093543592729592895e+00
1.700000000000000000e+01 4.967942937068439591e+00 -7.272387792396337147e+00
1.800000000000000000e+01 4.967942937068439591e+00 -2.014964418439090466e+00
1.900000000000000000e+01 4.967942937068439591e+00 -3.321803440999664958e-01
2.000000000000000000e+01 4.967942937068439591e+00 6.348978034448279351e-01
2.100000000000000000e+01 4.967942937068439591e+00 1.261771716921193054e+00
2.200000000000000000e+01 4.967942937068439591e+00 1.676328101311908902e+00
2.300000000000000000e+01 4.967942937068439591e+00 1.936483688403810355e+00
2.400000000000000000e+01 4.967942937068439591e+00 2.071919989399000350e+00
2.500000000000000000e+01 4.967942937068439591e+00 2.097987675348642611e+00
2.600000000000000000e+01 4.967942937068439591e+00 2.021049630260479901e+00
2.700000000000000000e+01 4.967942937068439591e+00 1.840252843225316459e+00
2.800000000000000000e+01 4.967942937068439591e+00 1.547050107889504700e+00
2.900000000000000000e+01 4.967942937068439591e+00 1.122134161296914234e+00
3.000000000000000000e+01 4.967942937068439591e+00 5.273134214610166737e-01
3.100000000000000000e+01 4.967942937068439591e+00 -3.165112768839068447e-01
3.200000000000000000e+01 4.967942937068439591e+00 -1.604038349929879592e+00
3.300000000000000000e+01 4.967942937068439591e+00 -4.069566657674155152e+00
3.400000000000000000e+01 4.967942937068439591e+00 -7.225982632716058340e+00
3.500000000000000000e+01 4.967942937068439591e+00 -2.688064134445955489e+00
3.600000000000000000e+01 4.967942937068439591e+00 -1.097358709519087760e+00
3.700000000000000000e+01 4.967942937068439591e+00 -1.689396201487147753e-01
3.800000000000000000e+01 4.967942937068439591e+00 4.424911406190999430e-01
3.900000000000000000e+01 4.967942937068439591e+00 8.573557366333185437e-01
4.000000000000000000e+01 4.967942937068439591e+00 1.130415636785253808e+00
4.100000000000000000e+01 4.967942937068439591e+00 1.289358718647753754e+00
4.200000000000000000e+01 4.967942937068439591e+00 1.347816951559120735e+00
4.300000000000000000e+01 4.967942937068439591e+00 1.310345895774033265e+00
4.400000000000000000e+01 4.967942937068439591e+00 1.173949758583483050e+00
4.500000000000000000e+01 4.967942937068439591e+00 9.272887374155550644e-01
4.600000000000000000e+01 4.967942937068439591e+00 5.469862919299006698e-01
4.700000000000000000e+01 4.967942937068439591e+00 -1.211136885353647670e-02
4.800000000000000000e+01 4.967942937068439591e+00 -8.442336008460840091e-01
4.900000000000000000e+01 4.967942937068439591e+00 -2.191948890887748025e+00
5.000000000000000000e+01 4.967942937068439591e+00 -5.126070613486258587e+00
0.000000000000000000e+00 5.051276270401772628e+00 -2.833534484322786540e+00
1.000000000000000000e+00 5.051276270401772628e+00 -1.077925319624452349e+01
2.000000000000000000e+00 5.051276270401772628e+00 -3.110835811584760524e+00
3.000000000000000000e+00 5.051276270401772628e+00 -1.021655966959969852e+00
4.000000000000000000e+00 5.051276270401772628e+00 1.263466098775995750e-01
5.000000000000000000e+00 5.051276270401772628e+00 8.731692797195933498e-01
6.000000000000000000e+00 5.051276270401772628e+00 1.380074156522985485e+00
7.000000000000000000e+00 5.051276270401772628e+00 1.715357873933962773e+00
8.000000000000000000e+00 5.051276270401772628e+00 1.912054688308514994e+00
9.000000000000000000e+00 5.051276270401772628e+00 1.985724570739729522e+00
1.000000000000000000e+01 5.051276270401772628e+00 1.940776288783301773e+00
1.100000000000000000e+01 5.051276270401772628e+00 1.771999867022750141e+00
1.200000000000000000e+01 5.051276270401772628e+00 1.462623330179082970e+00
1.300000000000000000e+01 5.051276270401772628e+00 9.771943484025660265e-01
1.400000000000000000e+01 5.051276270401772628e+00 2.414785904872381317e-01
1.500000000000000000e+01 5.051276270401772628e+00 -9.248779219166605170e-01
1.600000000000000000e+01 5.051276270401772628e+00 -3.169899443833080976e+00
1.700000000000000000e+01 5.051276270401772628e+00 -7.514339118256680550e+00
1.800000000000000000e+01 5.051276270401772628e+00 -2.119551062181177503e+00
1.900000000000000000e+01 5.051276270401772628e+00 -4.089356071519639757e-01
2.000000000000000000e+01 5.051276270401772628e+00 5.818727636049085827e-01
2.100000000000000000e+01 5.051276270401772628e+00 1.233018961875648190e+00
2.200000000000000000e+01 5.051276270401772628e+00 1.673462310324803415e+00
2.300000000000000000e+01 5.051276270401772628e+00 1.961549260065064582e+00
2.400000000000000000e+01 5.051276270401772628e+00 2.127256910107059973e+00
2.500000000000000000e+01 5.051276270401772628e+00 2.186276191436508309e+00
2.600000000000000000e+01 5.051276270401772628e+00 2.145491133799318995e+00
2.700000000000000000e+01 5.051276270401772628e+00 2.004943028771735136e+00
2.800000000000000000e+01 5.051276270401772628e+00 1.757713545355483076e+00
2.900000000000000000e+01 5.051276270401772628e+00 1.387649577727237737e+00
3.000000000000000000e+01 5.051276270401772628e+00 8.632384081485702243e-01
3.100000000000000000e+01 5.051276270401772628e+00 1.217211167542716771e-01
3.200000000000000000e+01 5.051276270401772628e+00 -9.799883188603449868e-01
3.300000000000000000e+01 5.051276270401772628e+00 -2.889322586273904925e+00
3.400000000000000000e+01 5.051276270401772628e+00 -1.115798566491945465e+01
3.500000000000000000e+01 5.051276270401772628e+00 -3.324374688818620971e+00
3.600000000000000000e+01 5.051276270401772628e+00 -1.321371746941941927e+00
3.700000000000000000e+01 5.051276270401772628e+00 -2.430344409753662227e-01
3.800000000000000000e+01 5.051276270401772628e+00 4.465006503381847569e-01
3.900000000000000000e+01 5.051276270401772628e+00 9.079891846865667526e-01
4.000000000000000000e+01 5.051276270401772628e+00 1.209935611253762255e+00
4.100000000000000000e+01 5.051276270401772628e+00 1.385981175304457524e+00
4.200000000000000000e+01 5.051276270401772628e+00 1.452757331697366316e+00
4.300000000000000000e+01 5.051276270401772628e+00 1.416491019693207898e+00
4.400000000000000000e+01 5.051276270401772628e+00 1.275158612525457036e+00
4.500000000000000000e+01 5.051276270401772628e+00 1.017924074347196672e+00
4.600000000000000000e+01 5.051276270401772628e+00 6.214343767190708689e-01
4.700000000000000000e+01 5.051276270401772628e+00 3.972970665964338510e-02
4.800000000000000000e+01 5.051276270401772628e+00 -8.244412254695225872e-01
4.900000000000000000e+01 5.051276270401772628e+00 -2.225878055842660519e+00
5.000000000000000000e+01 5.051276270401772628e+00 -5.343637907969768008e+00
0.000000000000000000e+00 5.134609603735105665e+00 -4.548833297874519843e+00
1.000000000000000000e+00 5.134609603735105665e+00 -6.301541287018770809e+00
2.000000000000000000e+00 5.134609603735105665e+00 -2.366863811230857539e+00
3.000000000000000000e+00 5.134609603735105665e+00 -7.829409351337486278e-01
4.000000000000000000e+00 5.134609603735105665e+00 1.807242703199134493e-01
5.000000000000000000e+00 5.134609603735105665e+00 8.307491543482482532e-01
6.000000000000000000e+00 5.134609603735105665e+00 1.277663718834949114e+00
7.000000000000000000e+00 5.134609603735105665e+00 1.572146057754354453e+00
8.000000000000000000e+00 5.134609603735105665e+00 1.739427229757120053e+00
9.000000000000000000e+00 5.134609603735105665e+00 1.790979180801342663e+00
1.000000000000000000e+01 5.134609603735105665e+00 1.728707138141876154e+00
1.100000000000000000e+01 5.134609603735105665e+00 1.545528139119038302e+00
1.200000000000000000e+01 5.134609603735105665e+00 1.222795153785540379e+00
1.300000000000000000e+01 5.134609603735105665e+00 7.223530415005228189e-01
1.400000000000000000e+01 5.134609603735105665e+00 -3.565879759568519464e-02
1.500000000000000000e+01 5.134609603735105665e+00 -1.248920432340491660e+00
1.600000000000000000e+01 5.134609603735105665e+00 -3.670823657146595753e+00
1.700000000000000000e+01 5.134609603735105665e+00 -6.542119176606303377e+00
1.800000000000000000e+01 5.134609603735105665e+00 -2.069124060543330312e+00
1.900000000000000000e+01 5.134609603735105665e+00 -4.384211158205408854e-01
2.000000000000000000e+01 5.134609603735105665e+00 5.318917491951415943e-01
2.100000000000000000e+01 5.134609603735105665e+00 1.181075959614816817e+00
2.200000000000000000e+01 5.134609603735105665e+00 1.628536003375108621e+00
2.300000000000000000e+01 5.134609603735105665e+00 1.929267509355981014e+00
2.400000000000000000e+01 5.134609603735105665e+00 2.111871108564321808e+00
2.500000000000000000e+01 5.134609603735105665e+00 2.191531091276119003e+00
2.600000000000000000e+01 5.134609603735105665e+00 2.175174083282080950e+00
2.700000000000000000e+01 5.134609603735105665e+00 2.063417494782569417e+00
2.800000000000000000e+01 5.134609603735105665e+00 1.850671292648872202e+00
2.900000000000000000e+01 5.134609603735105665e+00 1.523459358658943552e+00
3.000000000000000000e+01 5.134609603735105665e+00 1.055812026411187432e+00
3.100000000000000000e+01 5.134609603735105665e+00 3.977735376471434048e-01
3.200000000000000000e+01 5.134609603735105665e+00 -5.573391556617154352e-01
3.300000000000000000e+01 5.134609603735105665e+00 -2.099333306189322013e+00
3.400000000000000000e+01 5.134609603735105665e+00 -5.757851042615978798e+00
3.500000000000000000e+01 5.134609603735105665e+00 -4.569701502873043886e+00
3.600000000000000000e+01 5.134609603735105665e+00 -1.837368629255757613e+00
3.700000000000000000e+01 5.134609603735105665e+00 -5.555641172259143667e-01
3.800000000000000000e+01 5.134609603735105665e+00 2.311124003176278363e-01
3.900000000000000000e+01 5.134609603735105665e+00 7.494370865878845489e-01
4.000000000000000000e+01 5.134609603735105665e+00 1.088101621988152523e+00
4.100000000000000000e+01 5.134609603735105665e+00 1.289075800079714895e+00
4.200000000000000000e+01 5.134609603735105665e+00 1.373170565341379712e+00
4.300000000000000000e+01 5.134609603735105665e+00 1.349106232138410633e+00
4.400000000000000000e+01 5.134609603735105665e+00 1.216679615438841067e+00
4.500000000000000000e+01 5.134609603735105665e+00 9.667833657985529516e-01
4.600000000000000000e+01 5.134609603735105665e+00 5.782968908767264216e-01
4.700000000000000000e+01 5.134609603735105665e+00 9.165802928523958046e-03
4.800000000000000000e+01 5.134609603735105665e+00 -8.286617629299616317e-01
4.900000000000000000e+01 5.134609603735105665e+00 -2.158195785322267302e+00
5.000000000000000000e+01 5.134609603735105665e+00 -4.901893739909120917e+00
0.000000000000000000e+00 5.217942937068439591e+00 -1.237212310257018721e+01
1.000000000000000000e+00 5.217942937068439591e+00 -3.876746231016349853e+00
2.000000000000000000e+00 5.217942937068439591e+00 -1.778472191501434541e+00
3.000000000000000000e+00 5.217942937068439591e+00 -6.037543751951204296e-01
4.000000000000000000e+00 5.217942937068439591e+00 1.759071648664106979e-01
5.000000000000000000e+00 5.217942937068439591e+00 7.203133349195148805e-01
6.000000000000000000e+00 5.217942937068439591e+00 1.098004425984118848e+00
7.000000000000000000e+00 5.217942937068439591e+00 1.342941405899652496e+00
8.000000000000000000e+00 5.217942937068439591e+00 1.472206924707580411e+00
9.000000000000000000e+00 5.217942937068439591e+00 1.492577151223603682e+00
1.000000000000000000e+01 5.217942937068439591e+00 1.402680456449259427e+00
1.100000000000000000e+01 5.217942937068439591e+00 1.192464852798419184e+00
1.200000000000000000e+01 5.217942937068439591e+00 8.395630943302353488e-01
1.300000000000000000e+01 5.217942937068439591e+00 2.993838578594132382e-01
1.400000000000000000e+01 5.217942937068439591e+00 -5.229776499727192274e-01
1.500000000000000000e+01 5.217942937068439591e+00 -1.876083728450111954e+00
1.600000000000000000e+01 5.217942937068439591e+00 -4.892136594437518582e+00
1.700000000000000000e+01 5.217942937068439591e+00 -5.130111942445601869e+00
1.800000000000000000e+01 5.217942937068439591e+00 -1.870801552544567370e+00
1.900000000000000000e+01 5.217942937068439591e+00 -4.166276735660299768e-01
2.000000000000000000e+01 5.217942937068439591e+00 4.890579372033847516e-01
2.100000000000000000e+01 5.217942937068439591e+00 1.109813504224891112e+00
2.200000000000000000e+01 5.217942937068439591e+00 1.545828226808329431e+00
2.300000000000000000e+01 5.217942937068439591e+00 1.845054516582176118e+00
2.400000000000000000e+01 5.217942937068439591e+00 2.033035770420744459e+00
2.500000000000000000e+01 5.217942937068439591e+00 2.123609211361219273e+00
2.600000000000000000e+01 5.217942937068439591e+00 2.123311769187762543e+00
2.700000000000000000e+01 5.217942937068439591e+00 2.033125267055157614e+00
2.800000000000000000e+01 5.217942937068439591e+00 1.848696397695187787e+00
2.900000000000000000e+01 5.217942937068439591e+00 1.559161958102494250e+00
3.000000000000000000e+01 5.217942937068439591e+00 1.143853509856063377e+00
3.100000000000000000e+01 5.217942937068439591e+00 5.644090401386585576e-01
3.200000000000000000e+01 5.217942937068439591e+00 -2.559173950682323562e-01
3.300000000000000000e+01 5.217942937068439591e+00 -1.500617861415837861e+00
3.400000000000000000e+01 5.217942937068439591e+00 -3.828130427189691876e+00
3.500000000000000000e+01 5.217942937068439591e+00 -8.072846347730274985e+00
3.600000000000000000e+01 5.217942937068439591e+00 -2.842766550637144451e+00
3.700000000000000000e+01 5.217942937068439591e+00 -1.192177520281181291e+00
3.800000000000000000e+01 5.217942937068439591e+00 -2.525654979072383122e-01
3.900000000000000000e+01 5.217942937068439591e+00 3.508278098188845062e-01
4.000000000000000000e+01 5.217942937068439591e+00 7.446315345662999352e-01
4.100000000000000000e+01 5.217942937068439591e+00 9.852102276058389840e-01
4.200000000000000000e+01 5.217942937068439591e+00 1.100329002471561068e+00
4.300000000000000000e+01 5.217942937068439591e+00 1.102879721538868596e+00
4.400000000000000000e+01 5.217942937068439591e+00 9.958931680338586334e-01
4.500000000000000000e+01 5.217942937068439591e+00 7.736712355611058411e-01
4.600000000000000000e+01 5.217942937068439591e+00 4.199564133118913190e-01
4.700000000000000000e+01 5.217942937068439591e+00 -9.835641682374839101e-02
4.800000000000000000e+01 5.217942937068439591e+00 -8.484087719717262610e-01
4.900000000000000000e+01 5.217942937068439591e+00 -1.986250752838986333e+00
5.000000000000000000e+01 5.217942937068439591e+00 -4.021479737114217023e+00
0.000000000000000000e+00 5.301276270401772628e+00 -4.559630922184015667e+00
1.000000000000000000e+00 5.301276270401772628e+00 -2.469138102375688870e+00
2.000000000000000000e+00 5.301276270401772628e+00 -1.265743561839008047e+00
3.000000000000000000e+00 5.301276270401772628e+00 -4.490588558372012318e-01
4.000000000000000000e+00 5.301276270401772628e+00 1.359995532834815668e-01
5.000000000000000000e+00 5.301276270401772628e+00 5.570694098818721463e-01
6.000000000000000000e+00 5.301276270401772628e+00 8.483911012314805378e-01
7.000000000000000000e+00 5.301276270401772628e+00 1.027968166990246957e+00
8.000000000000000000e+00 5.301276270401772628e+00 1.104129203385378899e+00
9.000000000000000000e+00 5.301276270401772628e+00 1.077980014795891783e+00
1.000000000000000000e+01 5.301276270401772628e+00 9.435920400165532795e-01
1.100000000000000000e+01 5.301276270401772628e+00 6.860443028480833760e-01
1.200000000000000000e+01 5.301276270401772628e+00 2.758640722070205276e-01
1.300000000000000000e+01 5.301276270401772628e+00 -3.453624501302610672e-01
1.400000000000000000e+01 5.301276270401772628e+00 -1.308462938250832153e+00
1.500000000000000000e+01 5.301276270401772628e+00 -3.004910774280556307e+00
1.600000000000000000e+01 5.301276270401772628e+00 -8.701135722957529239e+00
1.700000000000000000e+01 5.301276270401772628e+00 -3.817902072569476335e+00
1.800000000000000000e+01 5.301276270401772628e+00 -1.560098588921561280e+00
1.900000000000000000e+01 5.301276270401772628e+00 -3.412566787564718651e-01
2.000000000000000000e+01 5.301276270401772628e+00 4.633871105981019478e-01
2.100000000000000000e+01 5.301276270401772628e+00 1.031870323014611346e+00
2.200000000000000000e+01 5.301276270401772628e+00 1.439591311603478418e+00
2.300000000000000000e+01 5.301276270401772628e+00 1.724780457036768633e+00
2.400000000000000000e+01 5.301276270401772628e+00 1.908561098538539280e+00
2.500000000000000000e+01 5.301276270401772628e+00 2.002707554323420069e+00
2.600000000000000000e+01 5.301276270401772628e+00 2.013006154389248348e+00
2.700000000000000000e+01 5.301276270401772628e+00 1.940660446384028237e+00
2.800000000000000000e+01 5.301276270401772628e+00 1.782557582433899723e+00
2.900000000000000000e+01 5.301276270401772628e+00 1.530536435144286500e+00
3.000000000000000000e+01 5.301276270401772628e+00 1.169262605146843104e+00
3.100000000000000000e+01 5.301276270401772628e+00 6.713665187161323988e-01
3.200000000000000000e+01 5.301276270401772628e+00 -1.420318904401495635e-02
3.300000000000000000e+01 5.301276270401772628e+00 -9.950251915504408906e-01
3.400000000000000000e+01 5.301276270401772628e+00 -2.561719401559062081e+00
3.500000000000000000e+01 5.301276270401772628e+00 -6.245626116225331259e+00
3.600000000000000000e+01 5.301276270401772628e+00 -5.077885316839978458e+00
3.700000000000000000e+01 5.301276270401772628e+00 -2.370618873713271846e+00
3.800000000000000000e+01 5.301276270401772628e+00 -1.113979409627180450e+00
3.900000000000000000e+01 5.301276270401772628e+00 -3.534171121631221602e-01
4.000000000000000000e+01 5.301276270401772628e+00 1.375148820374047787e-01
4.100000000000000000e+01 5.301276270401772628e+00 4.472839774148603120e-01
4.200000000000000000e+01 5.301276270401772628e+00 6.177093763284070560e-01
4.300000000000000000e+01 5.301276270401772628e+00 6.695335471571161046e-01
4.400000000000000000e+01 5.301276270401772628e+00 6.115226654152282615e-01
4.500000000000000000e+01 5.301276270401772628e+00 4.437052307693199471e-01
4.600000000000000000e+01 5.301276270401772628e+00 1.575491277529696421e-01
4.700000000000000000e+01 5.301276270401772628e+00 -2.667726734607930861e-01
4.800000000000000000e+01 5.301276270401772628e+00 -8.682931710831256478e-01
4.900000000000000000e+01 5.301276270401772628e+00 -1.727004784687899086e+00
5.000000000000000000e+01 5.301276270401772628e+00 -3.037628138676771172e+00
